# Supplementary material for: Copper-based catalysts derived from salen-type ligands: synthesis of 5-substituted-1H-tetrazoles via [3+2] cycloaddition and propargylamines via A3-coupling reactions
Source: Royal Society of Chemistry journal article supplement (doi:10.1039/d0nj03081c), 2020-01-01
Supplement: d0nj03081c1.pdf [file d0nj03081c1.pdf]

## Supporting Information

### Copper-based catalysts derived from salen-type ligands: Synthesis of 5-substituted-1H-tetrazoles *via* [3+2] cycloaddition and propargylamines *via* A<sup>3</sup>-coupling reactions

Anshu Singh, Ankur Maji, Aurobinda Mohanty, Kaushik Ghosh\*<sup>a</sup>

<sup>a</sup> Department of Chemistry, Indian Institute of Technology Roorkee, Roorkee 247667, Uttarakhand, India  
E-mail: kaushik.ghosh@cy.iitr.ac.in Fax: +91-1332-273560; Tel: +91-1332-275547

#### Table of contents

|                   |                                                                                                                           |
|-------------------|---------------------------------------------------------------------------------------------------------------------------|
| Figure S1         | <sup>1</sup> H NMR spectrum of L <sup>1</sup> H taking CDCl <sub>3</sub> as solvent.                                      |
| Figure S2         | D <sub>2</sub> O exchange of <sup>1</sup> H NMR spectrum of L <sup>1</sup> H taking CDCl <sub>3</sub> as solvent.         |
| Figure S3         | <sup>13</sup> C NMR spectrum of L <sup>1</sup> H taking CDCl <sub>3</sub> as solvent.                                     |
| Figure S4         | <sup>1</sup> H NMR spectrum of L <sup>2</sup> H taking CDCl <sub>3</sub> as solvent.                                      |
| Figure S5         | <sup>13</sup> C NMR spectrum of L <sup>2</sup> H taking CDCl <sub>3</sub> as solvent.                                     |
| Figure S6         | <sup>1</sup> H NMR spectrum of L <sup>3</sup> H taking CDCl <sub>3</sub> as solvent.                                      |
| Figure S7         | <sup>13</sup> C NMR spectrum of L <sup>3</sup> H taking CDCl <sub>3</sub> as solvent.                                     |
| Figure S8         | <sup>1</sup> H NMR spectrum of L <sup>4</sup> H taking CDCl <sub>3</sub> as solvent.                                      |
| Figure S9         | <sup>13</sup> C NMR spectrum of L <sup>4</sup> H taking CDCl <sub>3</sub> as solvent.                                     |
| Figure S10        | ESI-MS Spectrum of L <sup>1</sup> H using acetonitrile as solvent.                                                        |
| Figure S11        | ESI-MS Spectrum of L <sup>2</sup> H using acetonitrile as solvent.                                                        |
| Figure S12        | ESI-MS Spectrum of L <sup>3</sup> H using acetonitrile as solvent.                                                        |
| Figure S13        | ESI-MS Spectrum of L <sup>4</sup> H using acetonitrile as solvent.                                                        |
| Figure S14        | Electronic absorption spectra and spectral data of ligands L <sup>1</sup> H-L <sup>4</sup> H in dichloromethane solution. |
| Figure S15        | Electronic absorption spectra and spectral data of complexes <b>1-4</b> in dichloromethane solution.                      |
| Figure S16        | FT-IR spectrum of free ligand L <sup>1</sup> H.                                                                           |
| Figure S17        | FT-IR spectrum of free ligand L <sup>2</sup> H.                                                                           |
| Figure S18        | FT-IR spectrum of free ligand L <sup>3</sup> H.                                                                           |
| Figure S19        | FT-IR spectrum of free ligand L <sup>4</sup> H.                                                                           |
| Figure S20        | FT-IR spectrum of complex <b>1</b> .                                                                                      |
| Figure S21        | FT-IR spectrum of complex <b>2</b> .                                                                                      |
| Figure S22        | FT-IR spectrum of complex <b>3</b> .                                                                                      |
| Figure S23        | FT-IR spectrum of complex <b>4</b> .                                                                                      |
| Figure S24        | ESI-MS spectra of complex <b>1</b> using acetonitrile as solvent.                                                         |
| Figure S25        | ESI-MS spectra of complex <b>2</b> using acetonitrile as solvent.                                                         |
| Figure S26        | ESI-MS spectra of complex <b>3</b> using acetonitrile as solvent.                                                         |
| Figure S27        | ESI-MS spectra of complex <b>4</b> using acetonitrile as solvent.                                                         |
| Table S1          | Crystal data and structural refinement parameters for complex <b>1</b> , <b>2</b> and <b>4</b> .                          |
| Table S2          | Selected bond angles and bond distances of complex <b>1</b> .                                                             |
| Table S3          | Selected bond angles and bond distances of complex <b>2</b> .                                                             |
| Table S4          | Selected bond angles and bond distances of complex <b>4</b> .                                                             |
| Figure S28-S51    | <sup>1</sup> H NMR and <sup>13</sup> C NMR spectrum of 3a-3l taking DMSO as solvent.                                      |
| Figure S52- S81   | <sup>1</sup> H NMR and <sup>13</sup> C NMR spectrum of 7aa-7ao taking CDCl <sub>3</sub> as solvent.                       |
| Figure S82- S109  | <sup>1</sup> H NMR and <sup>13</sup> C NMR spectrum of 8aa-8an taking CDCl <sub>3</sub> as solvent.                       |
| Figure S110- S139 | <sup>1</sup> H NMR and <sup>13</sup> C NMR spectrum of 9aa-9ao taking CDCl <sub>3</sub> as solvent.                       |
| Figure S140- S169 | <sup>1</sup> H NMR and <sup>13</sup> C NMR spectrum of 10aa-10ao taking CDCl <sub>3</sub> as solvent.                     |

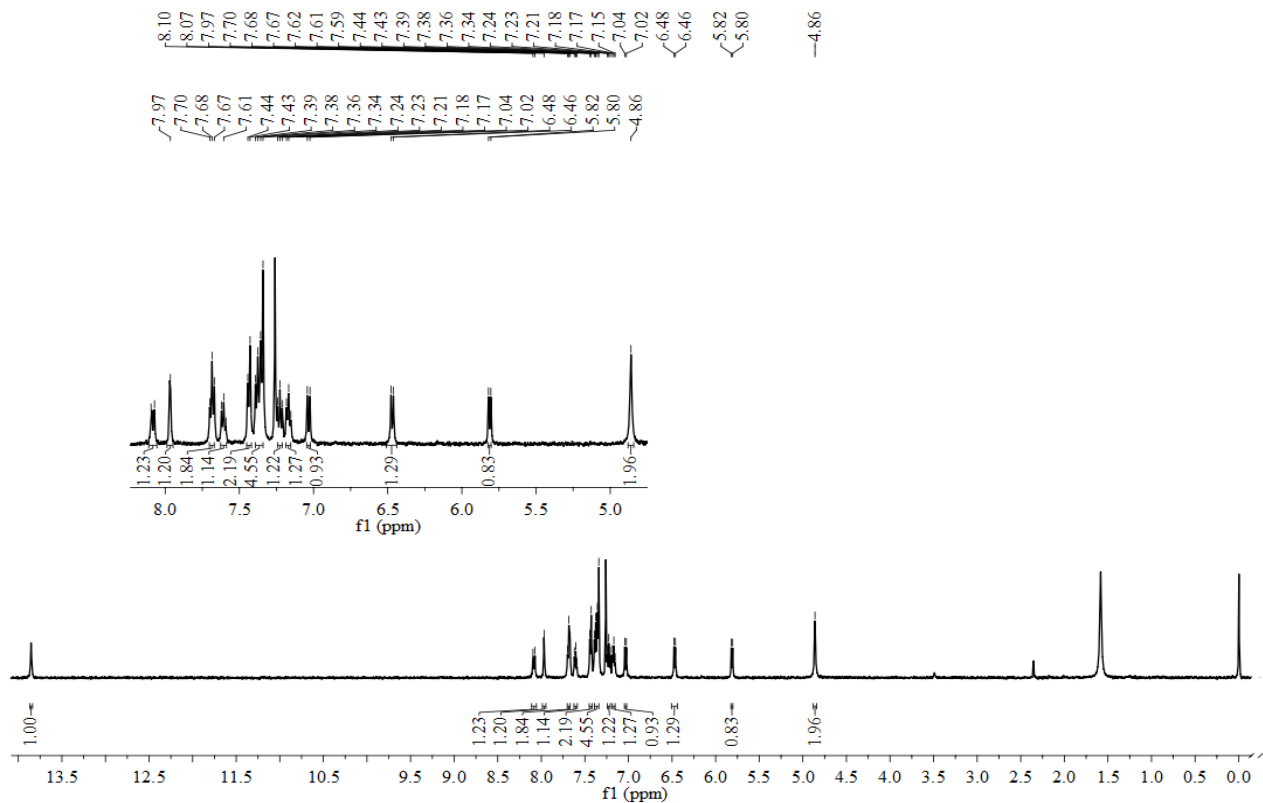

Figure S1:  $^1\text{H}$  NMR spectrum of  $\text{L}^1\text{H}$  taking  $\text{CDCl}_3$  as solvent.

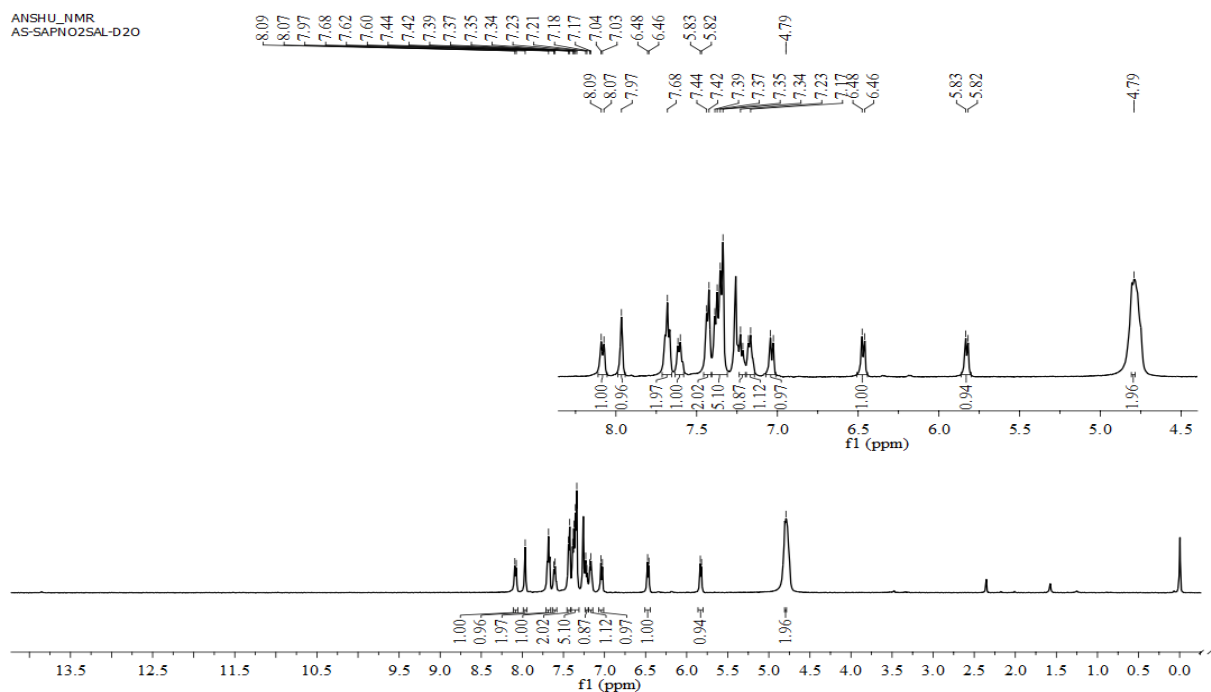

Figure S2:  $\text{D}_2\text{O}$  exchange of  $^1\text{H}$  NMR spectrum of  $\text{L}^1\text{H}$  taking  $\text{CDCl}_3$  as solvent.

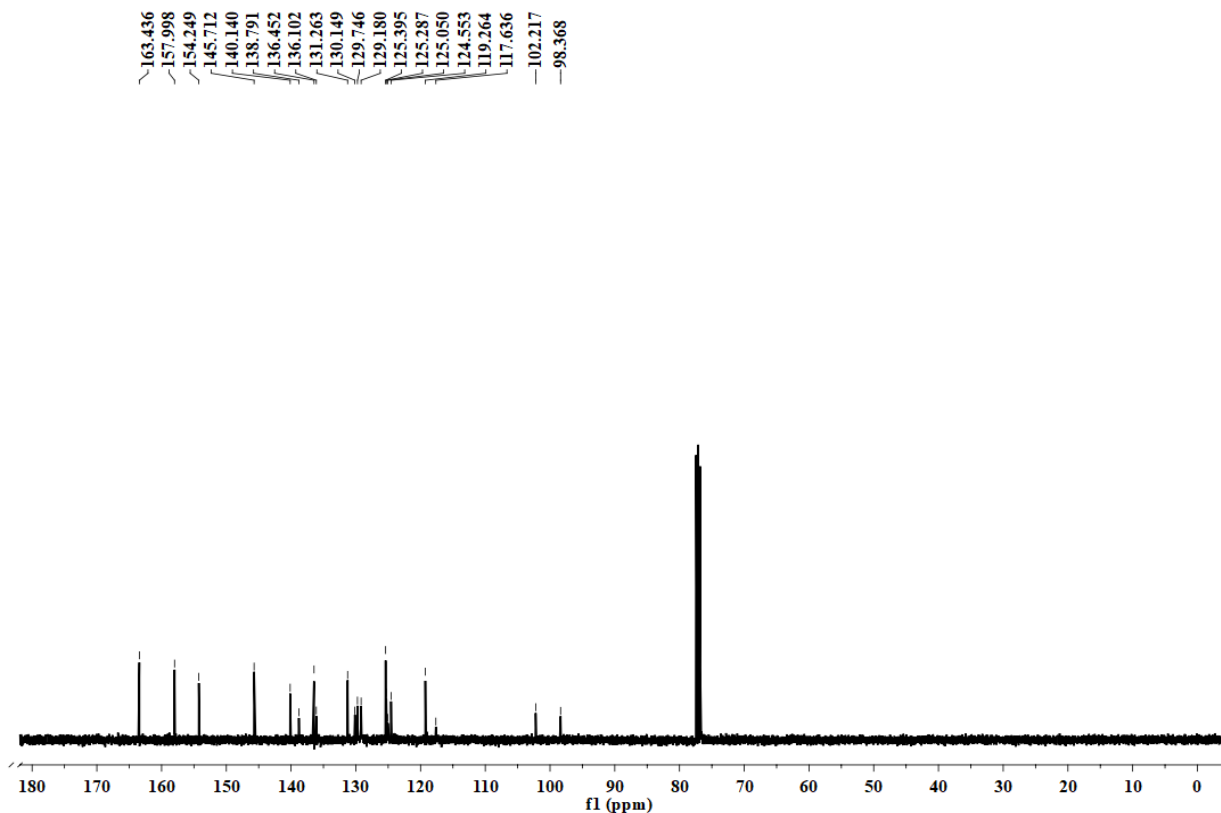

Figure S3:  $^{13}\text{C}$  NMR spectrum of  $\text{L}^1\text{H}$  taking  $\text{CDCl}_3$  as solvent.

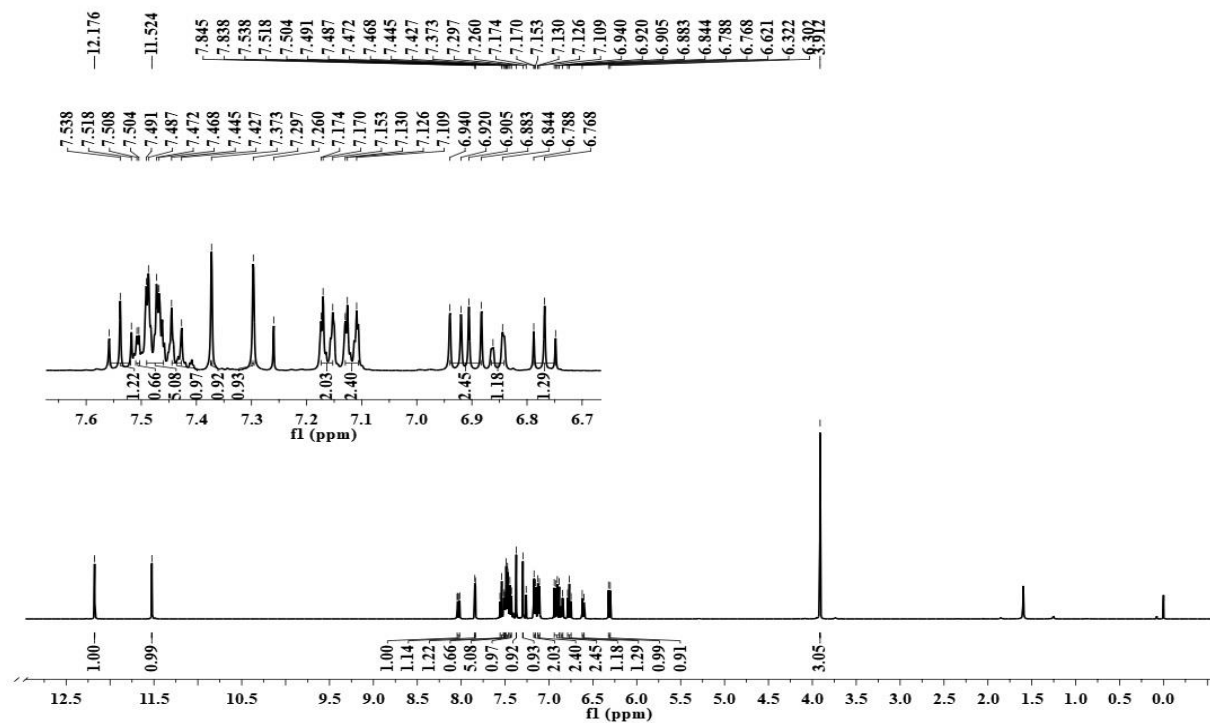

Figure S4:  $^1\text{H}$  NMR spectrum of  $\text{L}^2\text{H}$  taking  $\text{CDCl}_3$  as solvent.

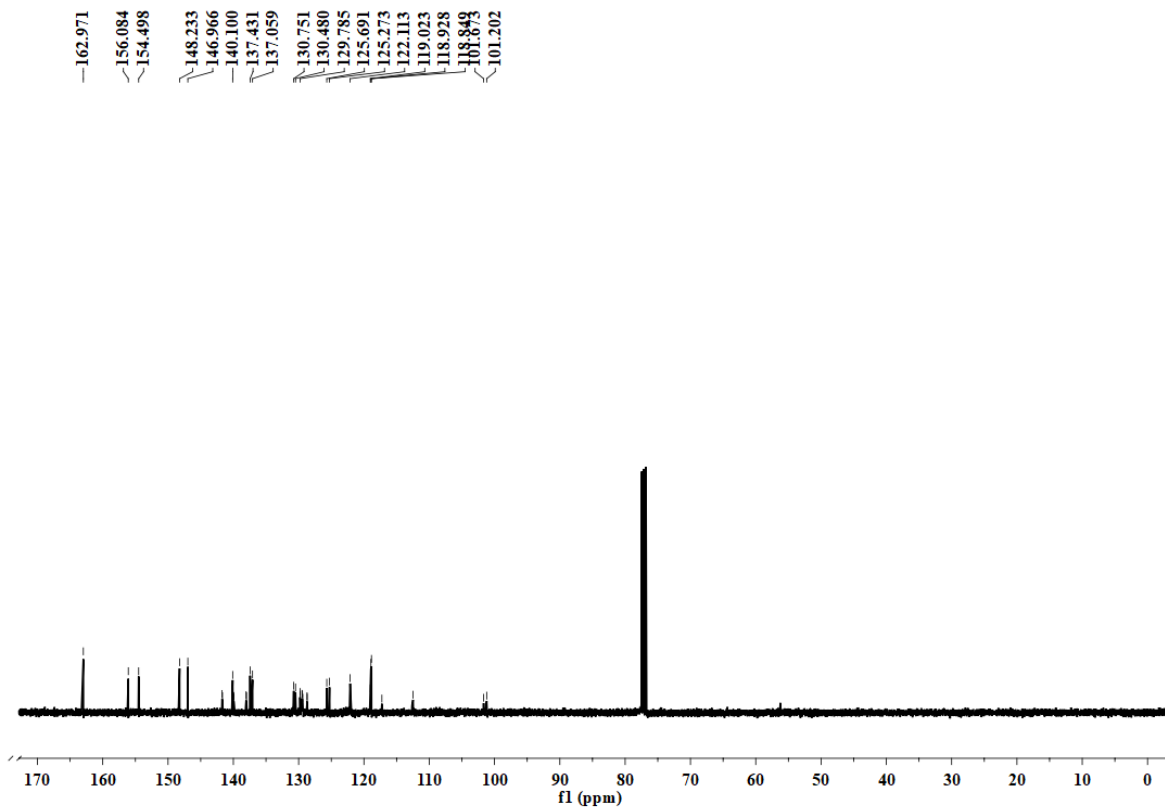

Figure S5:  $^{13}\text{C}$  NMR spectrum of  $\text{L}^2\text{H}$  taking  $\text{CDCl}_3$  as solvent.

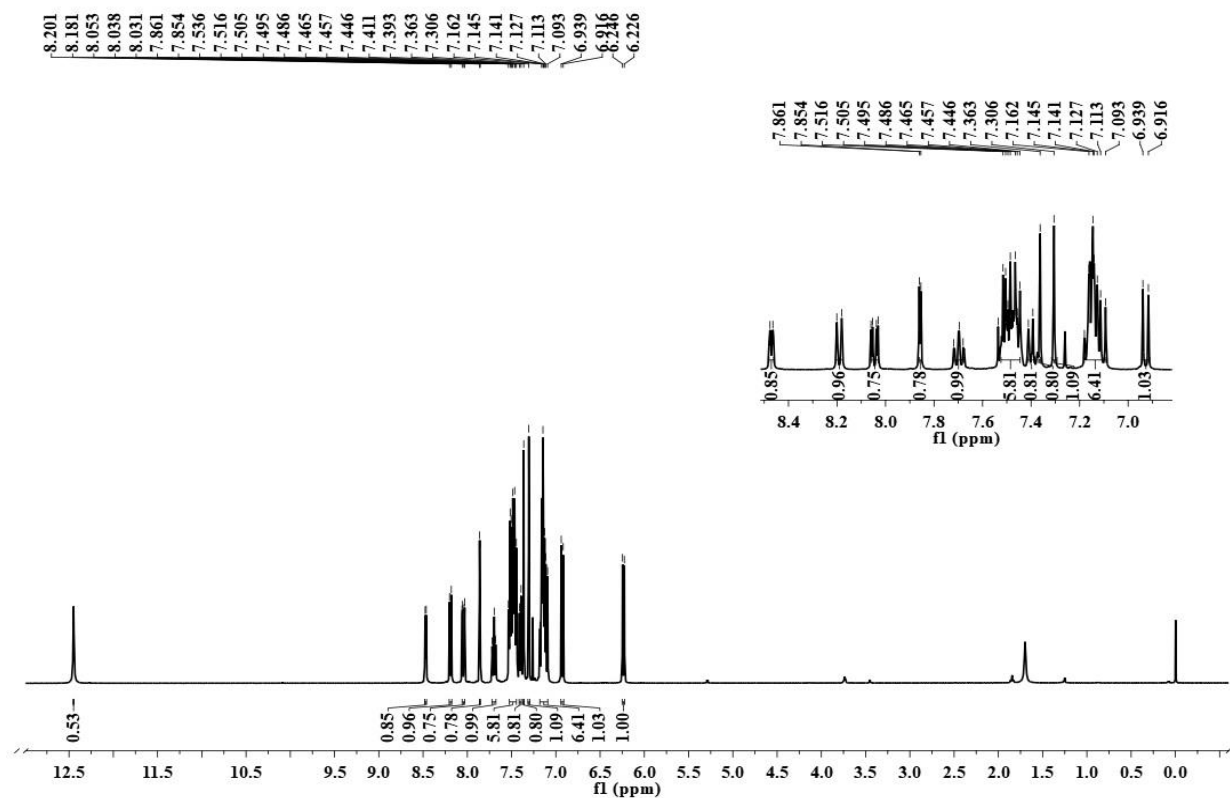

Figure S6:  $^1\text{H}$  NMR spectrum of  $\text{L}^3\text{H}$  taking  $\text{CDCl}_3$  as solvent.

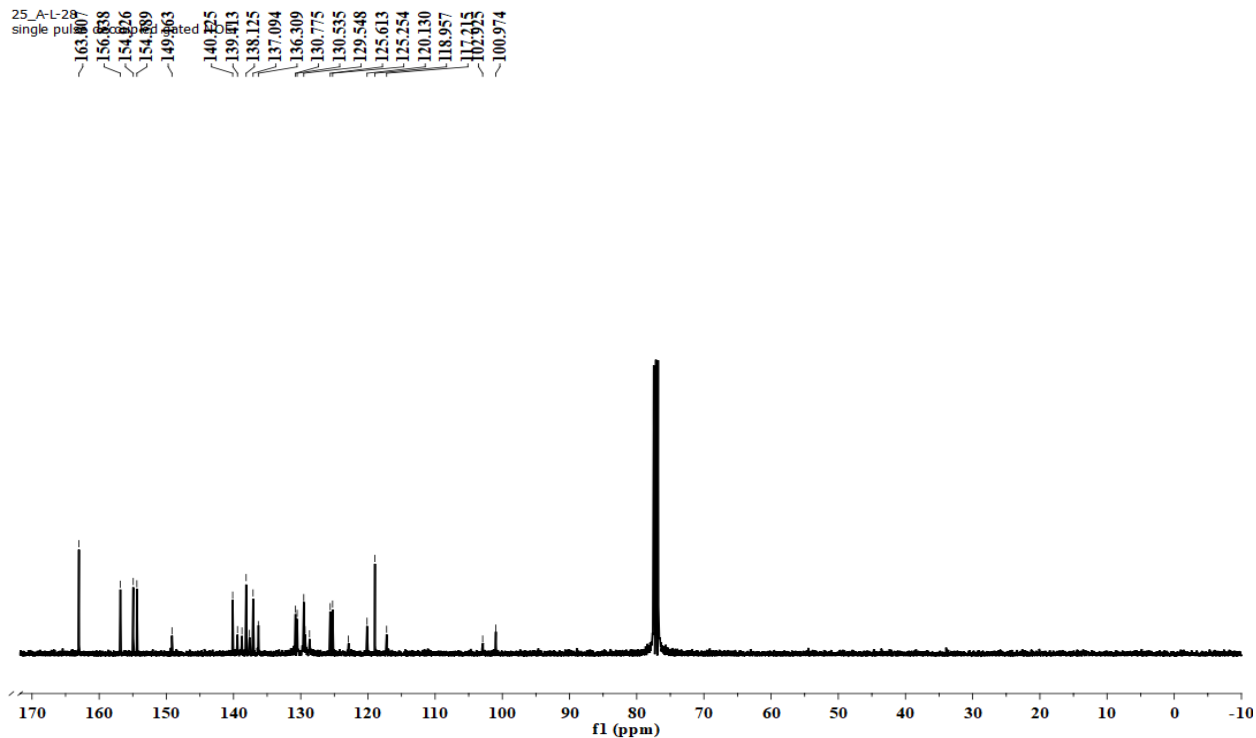

Figure S7:  $^{13}\text{C}$  NMR spectrum of  $\text{L}^3\text{H}$  taking  $\text{CDCl}_3$  as solvent.

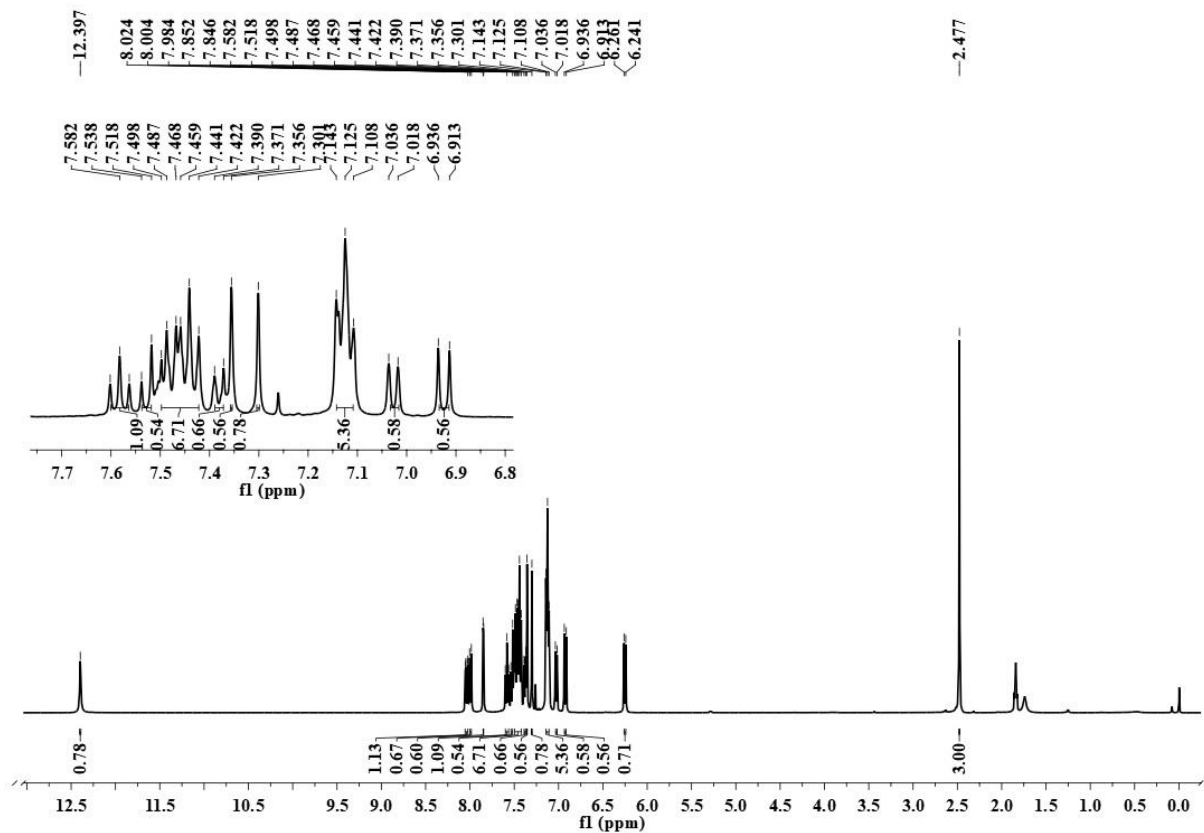

Figure S8:  $^1\text{H}$  NMR spectrum of  $\text{L}^4\text{H}$  taking  $\text{CDCl}_3$  as solvent.

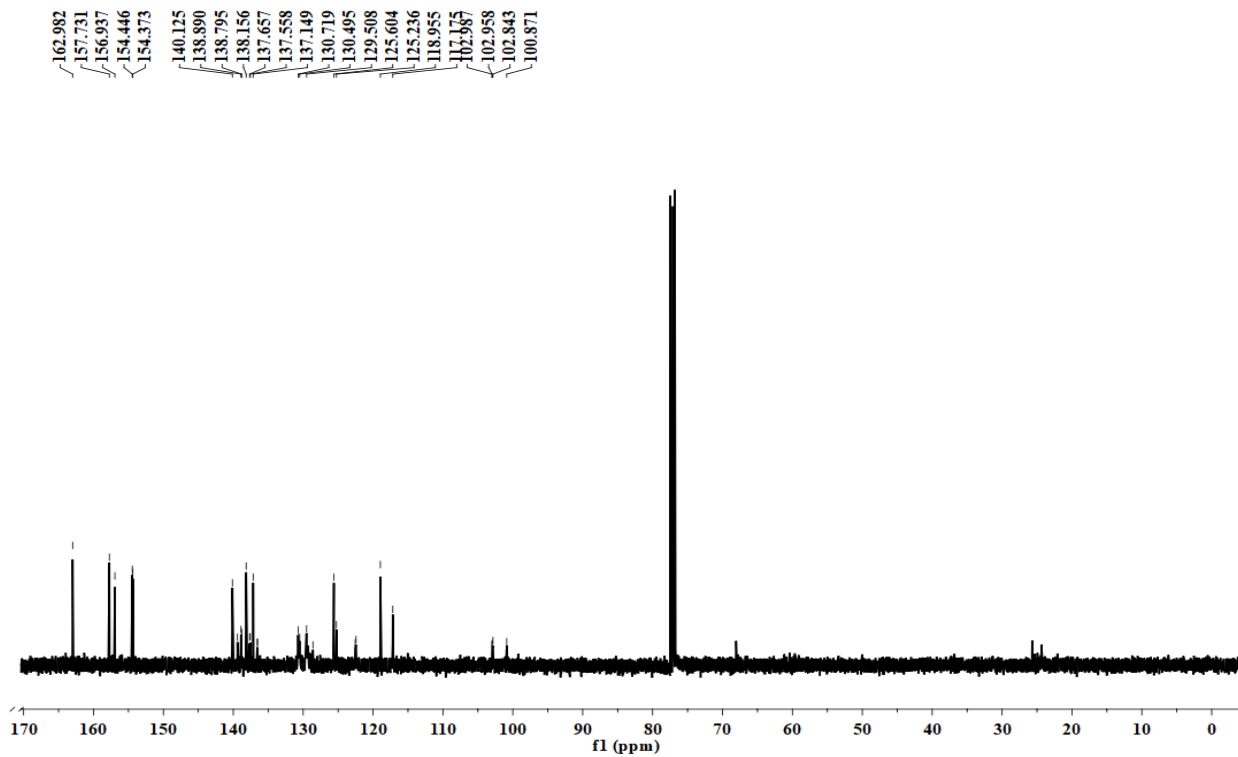

Figure S9:  $^{13}\text{C}$  NMR spectrum of  $\text{L}^4\text{H}$  taking  $\text{CDCl}_3$  as solvent.

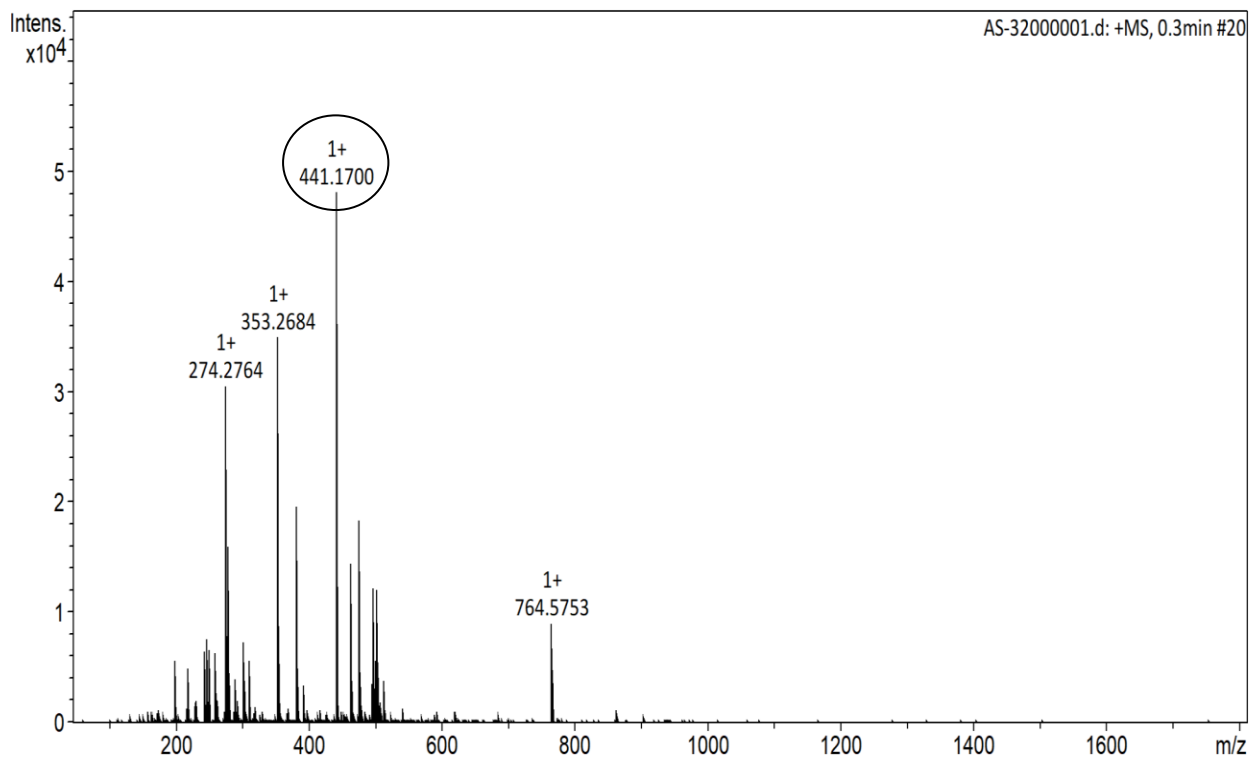

Figure S10: ESI-MS Spectrum of  $\text{L}^1\text{H}$  using acetonitrile as solvent.

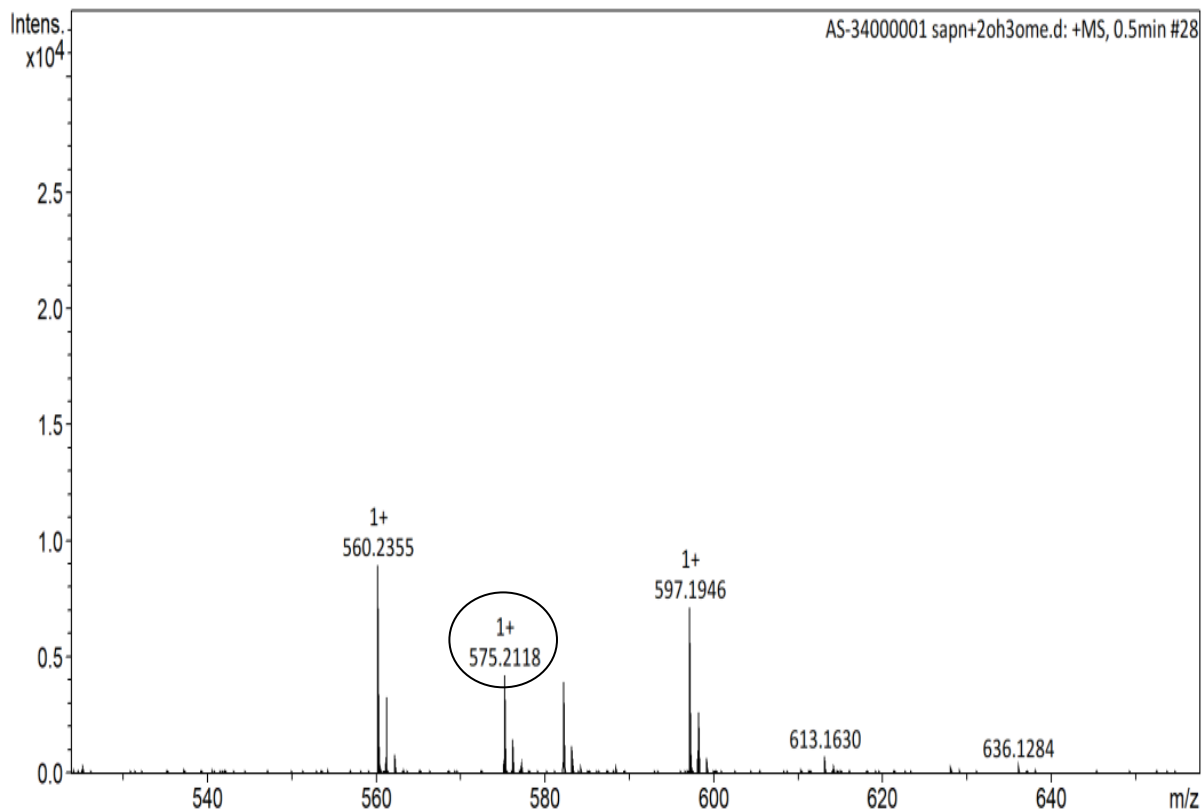

Figure S11: ESI-MS Spectrum of L<sup>2</sup>H using acetonitrile as solvent.

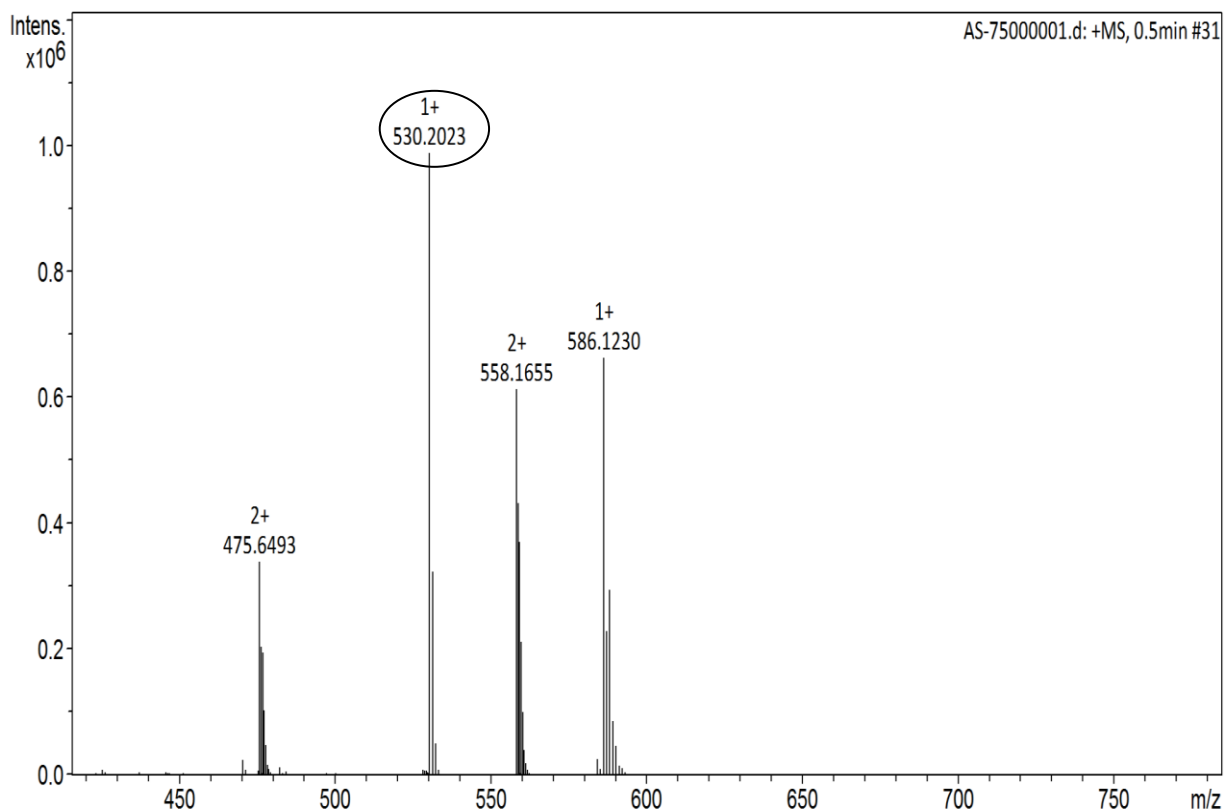

Figure S12: ESI-MS Spectrum of L<sup>3</sup>H using acetonitrile as solvent.

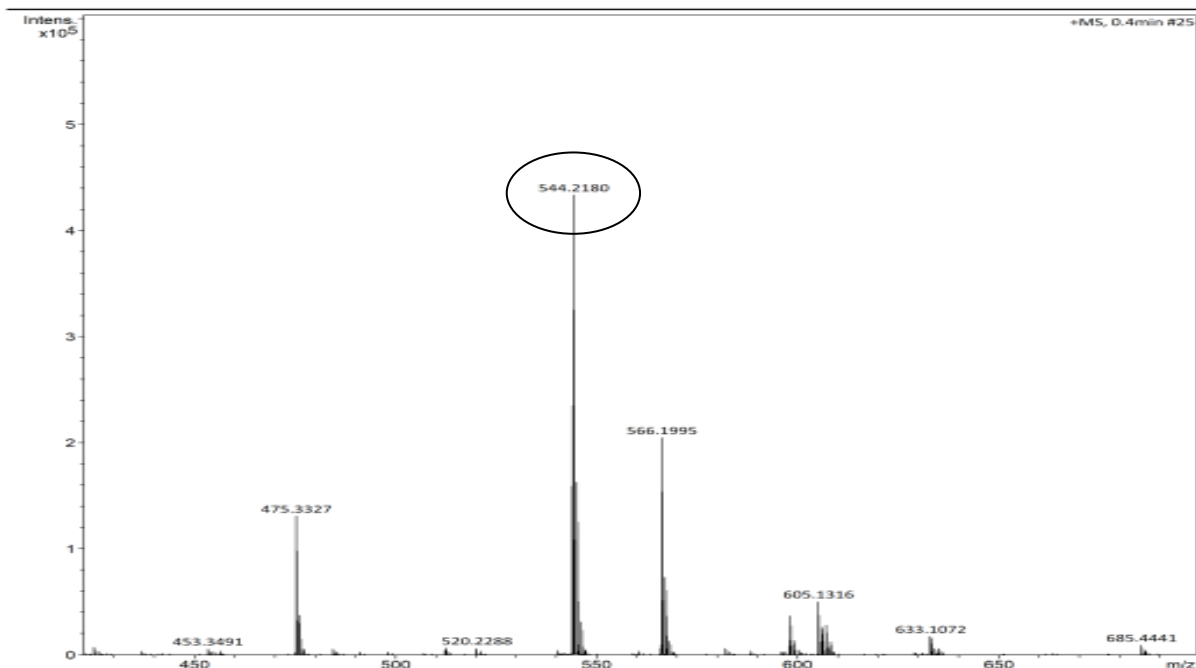

Figure S13: ESI-MS Spectrum of L<sup>4</sup>H using acetonitrile as solvent.

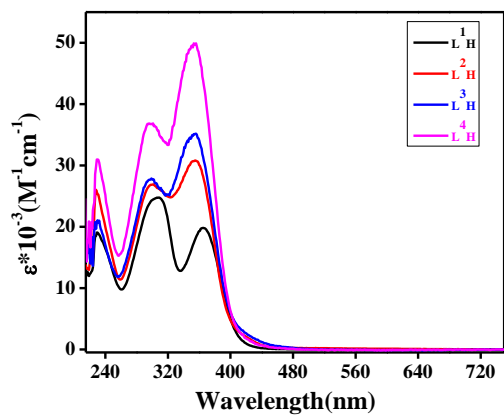

| Molecule         | $\lambda_{\max}$ (nm) | $\epsilon$ ( $M^{-1}cm^{-1}$ ) |
|------------------|-----------------------|--------------------------------|
| L <sup>1</sup> H | 230, 307, 365         | 19130, 24920, 20160            |
| L <sup>2</sup> H | 227, 298, 355         | 26130, 27020, 31020            |
| L <sup>3</sup> H | 231, 297, 355         | 21380, 28170, 35510            |
| L <sup>4</sup> H | 229, 297, 355         | 31230, 37010, 50180            |

Figure S14: Electronic absorption spectra and spectral data of ligands L<sup>1</sup>H-L<sup>4</sup>H in dichloromethane solution.

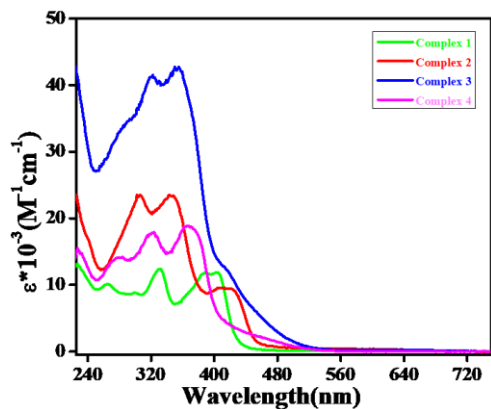

| Molecule  | $\lambda_{\max}$ (nm) | $\epsilon$ ( $M^{-1}cm^{-1}$ ) |
|-----------|-----------------------|--------------------------------|
| Complex 1 | 264, 331, 386, 404    | 10200, 12560, 11990, 12000     |
| Complex 2 | 304, 344, 406, 422    | 23550, 23670, 9770, 9650       |
| Complex 3 | 282, 320, 351, 418    | 33490, 41720, 42660, 11950     |
| Complex 4 | 280, 321, 364, 456    | 14280, 17990, 19110, 2420      |

Figure S15: Electronic absorption spectra and spectral data of complexes 1-4 in dichloromethane solution.



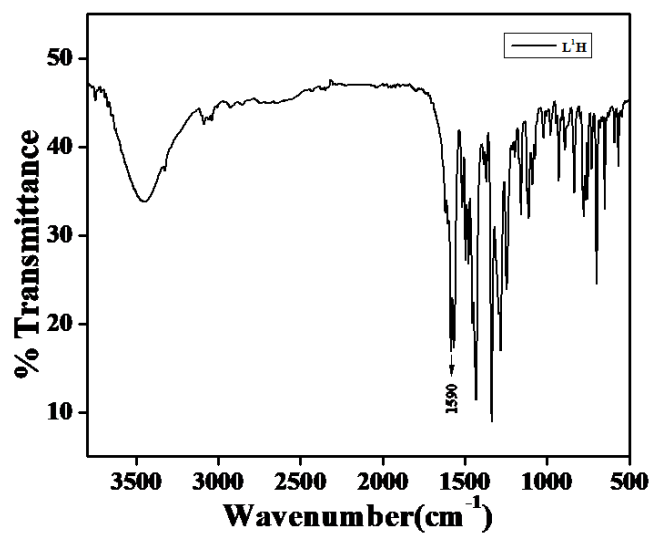

Figure S16: IR spectrum of ligand L<sup>1</sup>H.

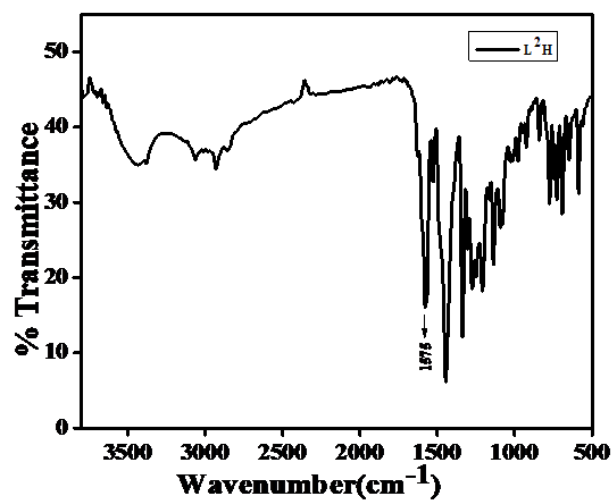

Figure S17: IR spectrum of ligand L<sup>2</sup>H.

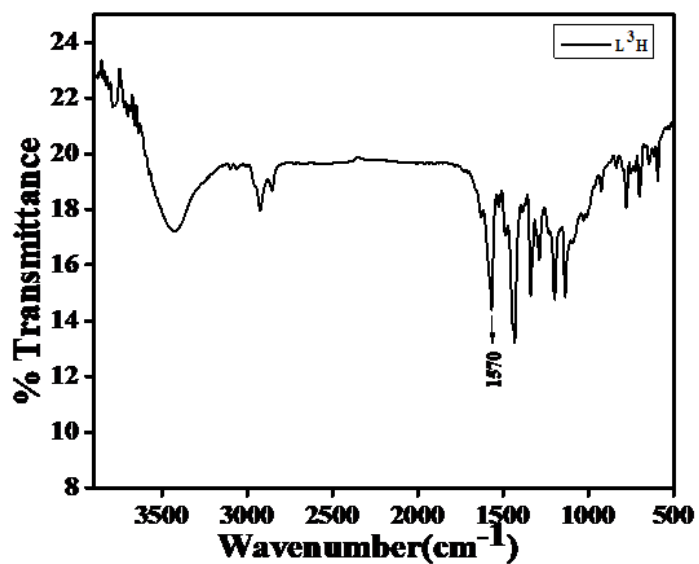

Figure S18: IR spectrum of ligand L<sup>3</sup>H.

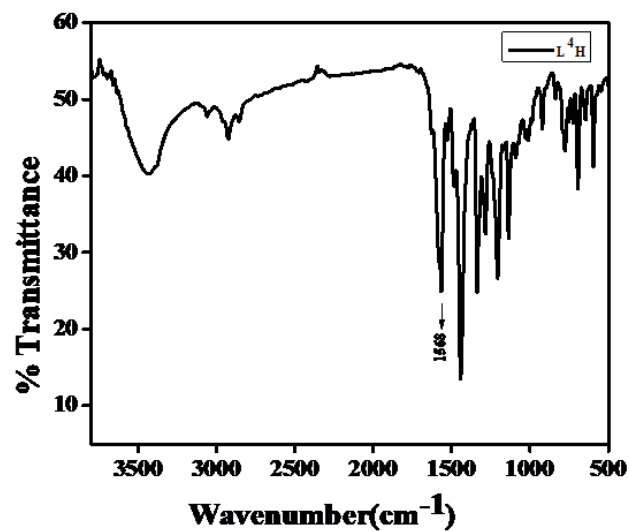

Figure S19: IR spectrum of ligand L<sup>4</sup>H.

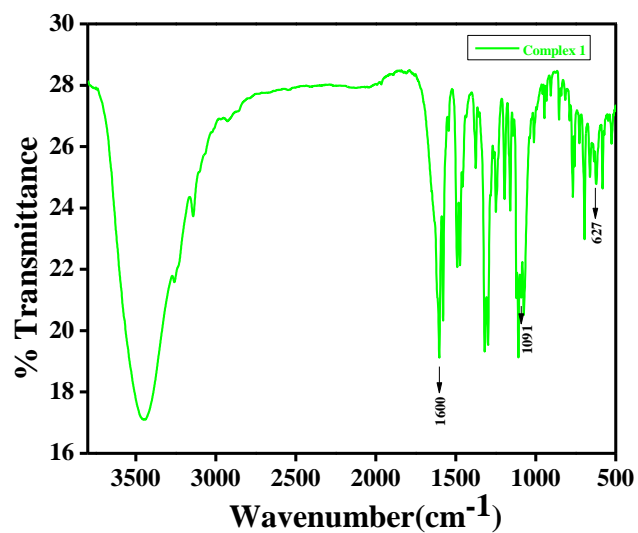

Figure S20: IR spectrum of complex 1.

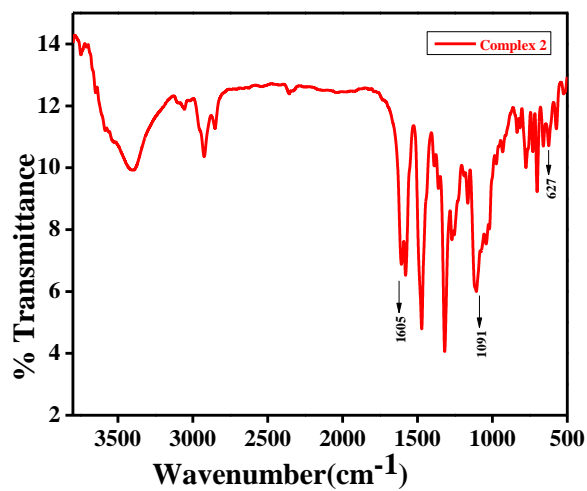

Figure S21: IR spectrum of complex 2.

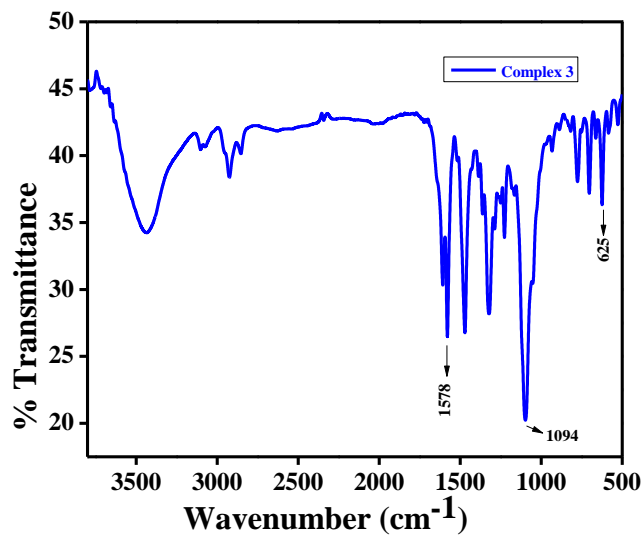

Figure S22: IR spectrum of complex 3.

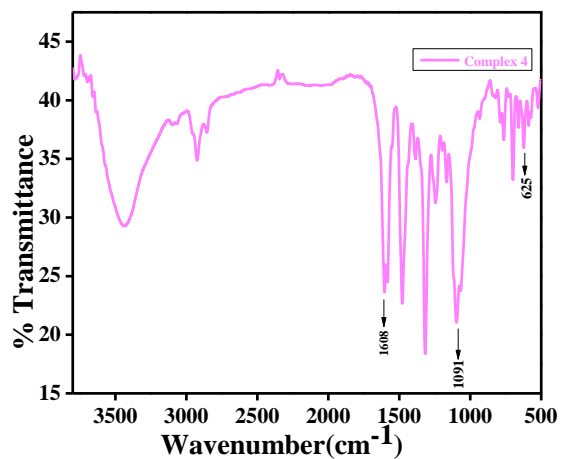

Figure S23: IR spectrum of complex 4.

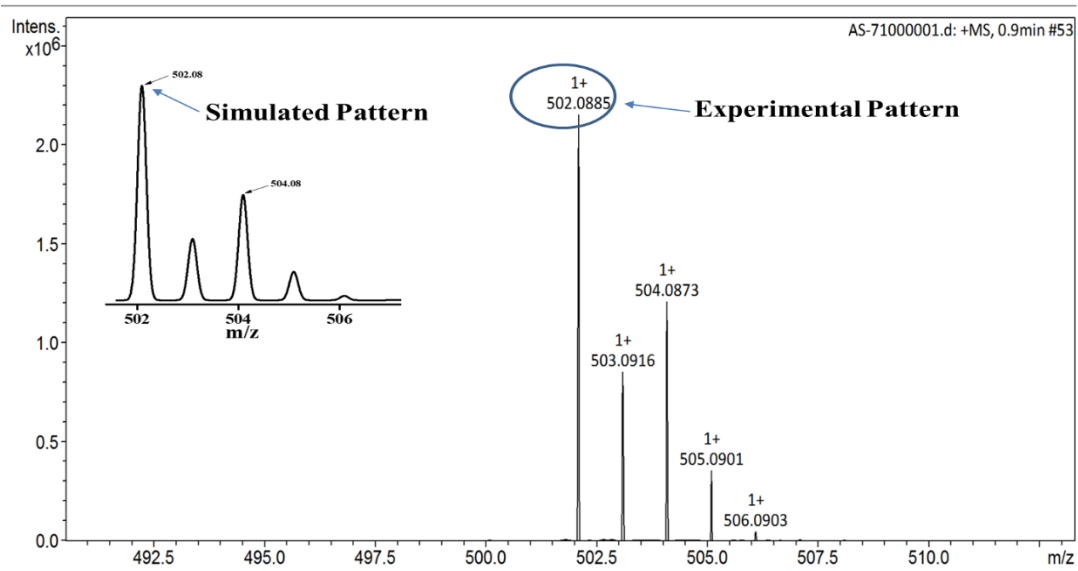

Figure S24: ESI-MS spectrum of complex 1 using acetonitrile as solvent.

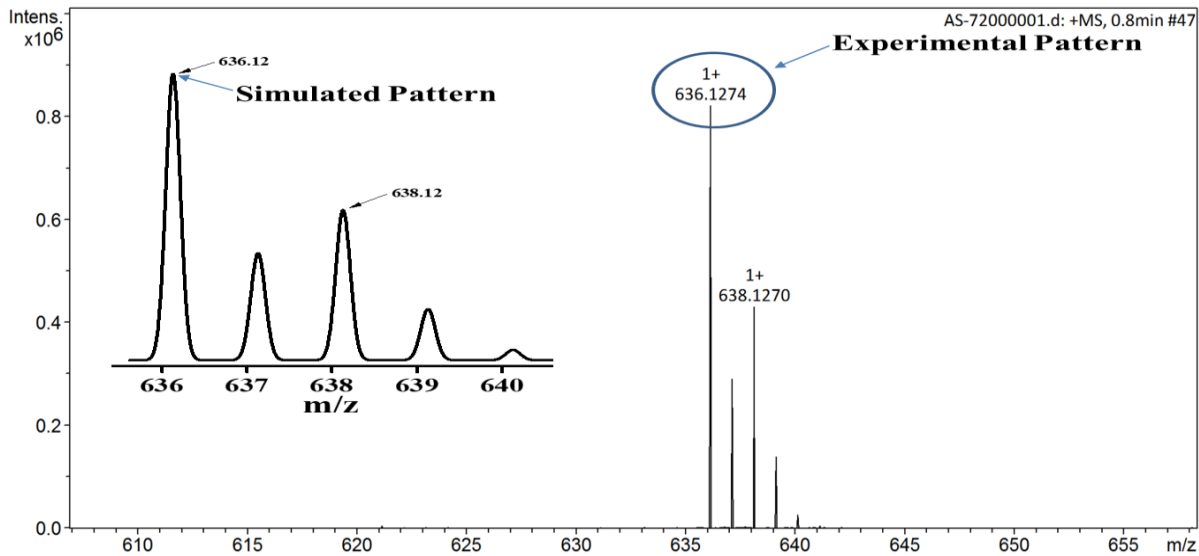

Figure S25: ESI-MS spectrum of complex **2** using acetonitrile as solvent.

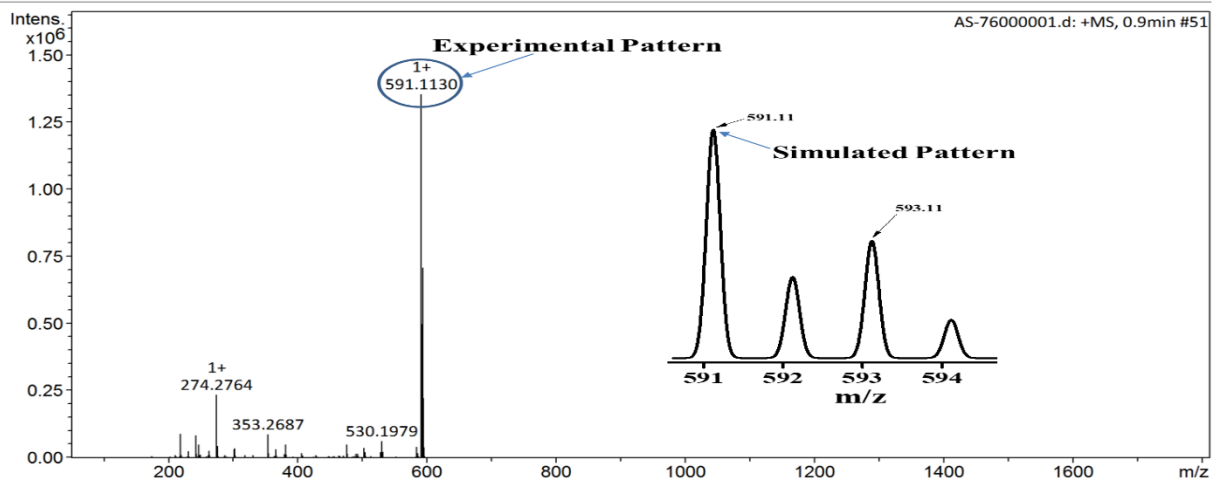

Figure S26: ESI-MS spectrum of complex **3** using acetonitrile as solvent.

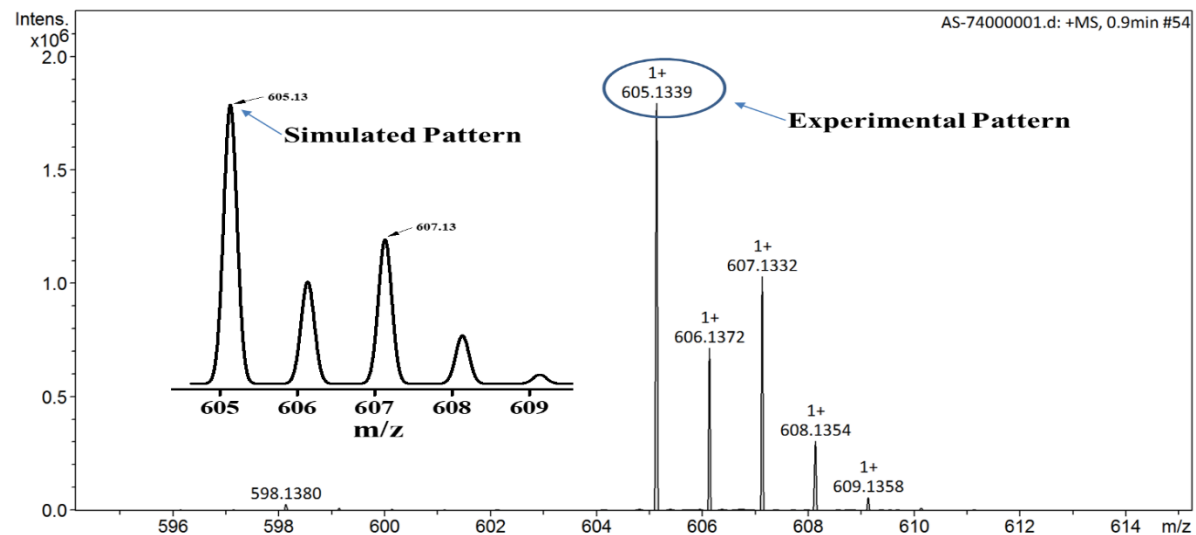

Figure S27: ESI-MS spectrum of complex **4** using acetonitrile as solvent.

**Table S1:** Crystal data and structural refinement parameters for complexes **1**, **2** and **4**.

| Empirical formula                                                  | <b>C24 H19 Cu N6 O3, Cl O4</b>                            | <b>C32 H25 Cl Cu N6 O9, 0.35(C7 H8), 0.15(C O)</b>        | <b>C31 H25 Cl2 Cu N7 O11 [+ solvent]</b>                  |
|--------------------------------------------------------------------|-----------------------------------------------------------|-----------------------------------------------------------|-----------------------------------------------------------|
| Color                                                              | Green                                                     | Green                                                     | Green                                                     |
| Formula weight                                                     | 602.44                                                    | 773.02                                                    | 806.03                                                    |
| Temperature (K)                                                    | 293(2)                                                    | 296(2)                                                    | 293(2)                                                    |
| $\lambda$ (Å) (Mo-K $\alpha$ )                                     | 0.71073                                                   | 0.71073                                                   | 0.71073                                                   |
| Crystal system                                                     | monoclinic                                                | triclinic                                                 | triclinic                                                 |
| Space group                                                        | <i>P</i> 21/ <i>n</i>                                     | <i>P</i> -1                                               | <i>P</i> -1                                               |
| <i>a</i> (Å)                                                       | 12.216(3)                                                 | 11.0303(12)                                               | 10.1909(4)                                                |
| <i>b</i> (Å)                                                       | 15.250(4)                                                 | 13.7093(13)                                               | 12.3887(5)                                                |
| <i>c</i> (Å)                                                       | 13.903(4)                                                 | 14.831(2)                                                 | 15.5047(5)                                                |
| $\alpha$ (°)                                                       | 90                                                        | 88.132(8)                                                 | 77.781(2)                                                 |
| $\beta$ (°)                                                        | 111.406(12)                                               | 68.696(6)                                                 | 77.754(2)                                                 |
| $\gamma$ (°)                                                       | 90                                                        | 70.091(6)                                                 | 69.406(2)                                                 |
| Z                                                                  | 4                                                         | 2                                                         | 2                                                         |
| $\rho_{\text{calc}}$ (gcm <sup>-3</sup> )                          | 1.659                                                     | 1.314                                                     | 1.512                                                     |
| F(000)                                                             | 1228.0                                                    | 793                                                       | 822.0                                                     |
| $\theta$ range for data collection                                 | 2.326–28.564                                              | 2.927–25.349                                              | 2.720–28.312                                              |
| Index ranges                                                       | -16< <i>h</i> <16, -14< <i>k</i> <20<br>-18< <i>l</i> <17 | -13< <i>h</i> <13, -16< <i>k</i> <16<br>-17< <i>l</i> <17 | -13< <i>h</i> <13, -16< <i>k</i> <16<br>-20< <i>l</i> <20 |
| Refinement method                                                  | Full matrix least-squares on F <sup>2</sup>               | Full matrix least-squares on F <sup>2</sup>               | Full matrix least-squares on F <sup>2</sup>               |
| Data/restraint/parameters                                          | 6016/13/ 350                                              | 7079/1/464                                                | 8667/0/470                                                |
| GOF <sup>a</sup> on F <sup>2</sup>                                 | 1.051                                                     | 1.066                                                     | 1.046                                                     |
| R <sub>1</sub> <sup>b</sup> [ <i>I</i> > 2 $\sigma$ ( <i>I</i> )]  | 0.0434                                                    | 0.0729                                                    | 0.0597                                                    |
| R <sub>1</sub> (all data)                                          | 0.0551                                                    | 0.1163                                                    | 0.1114                                                    |
| wR <sub>2</sub> <sup>c</sup> ( <i>I</i> > 2 $\sigma$ ( <i>I</i> )) | 0.1266                                                    | 0.2135                                                    | 0.1623                                                    |
| wR <sub>2</sub> (all data)                                         | 0.1363                                                    | 0.2476                                                    | 0.1893                                                    |

<sup>a</sup>GOF =  $[\sum[w(\text{Fo}^2 - \text{Fc}^2)^2] / (\text{M} - \text{N})]^{1/2}$  (M = number of reflections, N = number of parameters refined). <sup>b</sup>R<sub>1</sub> =  $\sum ||\text{Fo}| - |\text{Fc}|| / \sum |\text{Fo}|$ ,

<sup>c</sup>wR<sub>2</sub> =  $[\sum[w(\text{Fo}^2 - \text{Fc}^2)_2] / \sum [w(\text{Fo}_2)_2]]^{1/2}$

**Table S2:** Selected bond angles and bond distances of complex **1**.

| Bond Lengths (Å) |            | Bond Angles(°) |           |
|------------------|------------|----------------|-----------|
| Cu1—O1           | 1.8552(18) | O1—Cu1—N3      | 174.73(8) |
| Cu1—N3           | 1.883(2)   | O1—Cu1—N1      | 103.20(8) |
| Cu1—N1           | 2.075(2)   | O1—Cu1—N5      | 94.91(8)  |
| Cu1—N5           | 1.974(2)   | N3—Cu1—N1      | 81.00(9)  |
|                  |            | N3—Cu1—N5      | 80.72(8)  |
|                  |            | N5—Cu1—N1      | 161.53(8) |

**Table S3:** Selected bond angles and bond distances of complex **2**.

| Bond Lengths (Å) |          | Bond Angles(°) |            |
|------------------|----------|----------------|------------|
| Cu1—O1           | 1.854(3) | O1—Cu1—N3      | 168.85(18) |
| Cu1—N3           | 1.887(4) | O1—Cu1—N1      | 104.67(15) |
| Cu1—N1           | 2.090(4) | O1—Cu1—N5      | 94.97(15)  |
| Cu1—N5           | 1.973(4) | N3—Cu1—N1      | 79.93(17)  |
|                  |          | N3—Cu1—N5      | 80.09(17)  |
|                  |          | N5—Cu1—N1      | 160.02(17) |

**Table S4:** Selected bond angles and bond distances of complex 4.

|               |          |                  |            |
|---------------|----------|------------------|------------|
| <b>Cu1—O1</b> | 1.857(2) | <b>O1—Cu1—N3</b> | 176.58(11) |
| <b>Cu1—N3</b> | 1.891(3) | <b>O1—Cu1—N1</b> | 105.81(10) |
| <b>Cu1—N1</b> | 2.193(3) | <b>O1—Cu1—N5</b> | 95.25(10)  |
| <b>Cu1—N5</b> | 1.959(3) | <b>N3—Cu1—N1</b> | 77.51(11)  |
|               |          | <b>N3—Cu1—N5</b> | 81.58(12)  |
|               |          | <b>N5—Cu1—N1</b> | 157.33(11) |

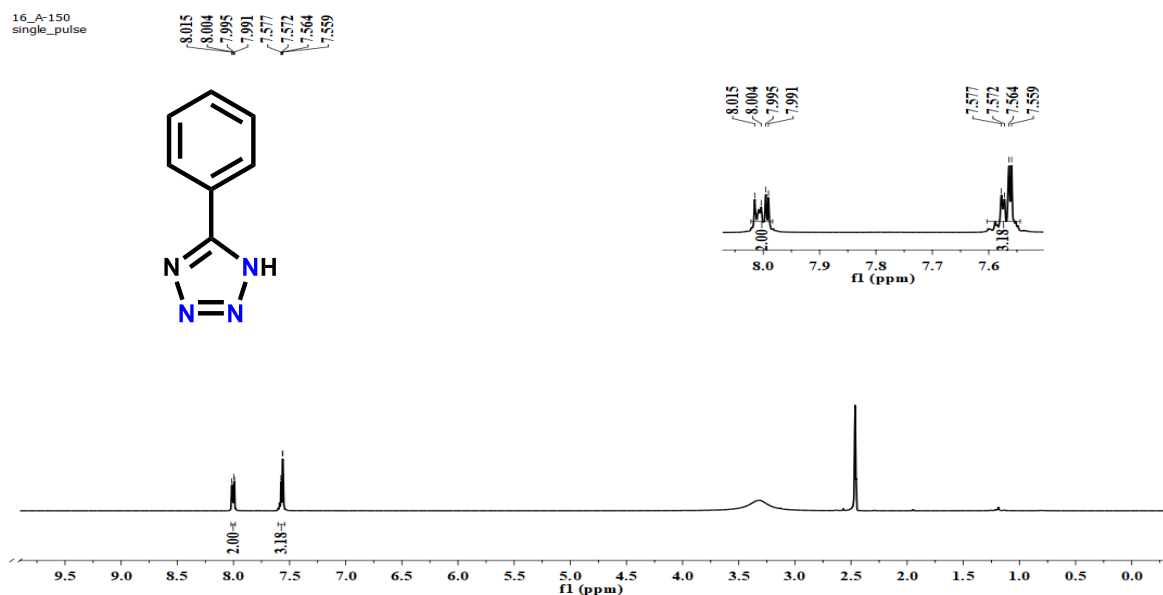

**Figure S28:**  $^1\text{H}$  NMR spectrum of 3a taking DMSO as solvent.

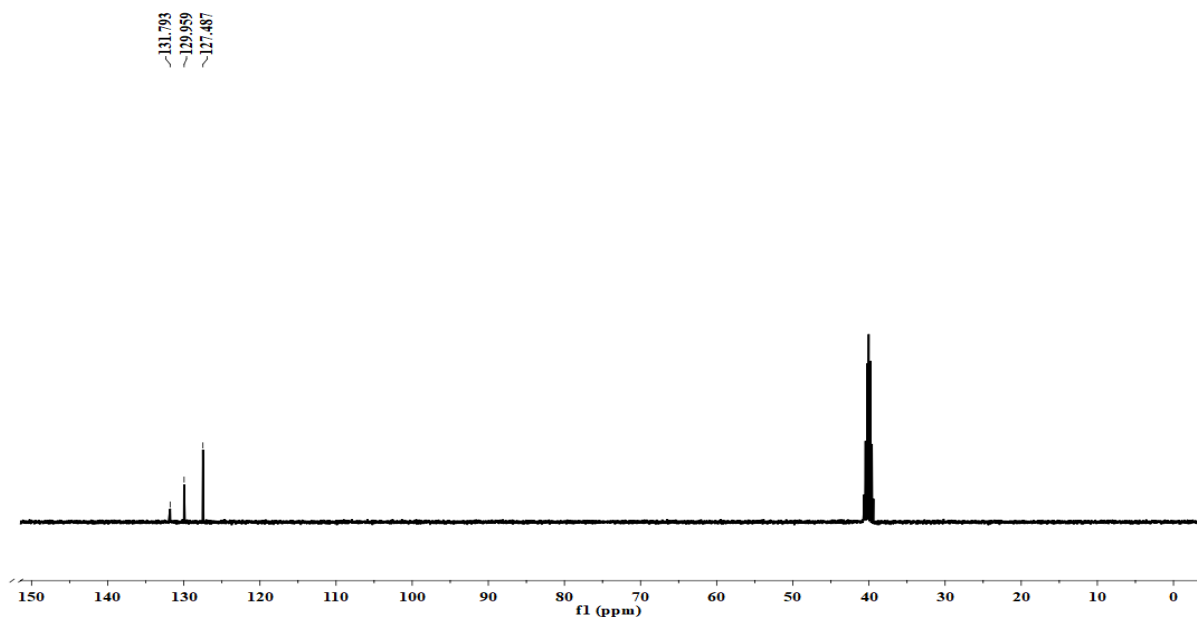

**Figure S29:**  $^{13}\text{C}$  NMR spectrum of taking 3a DMSO as solvent.

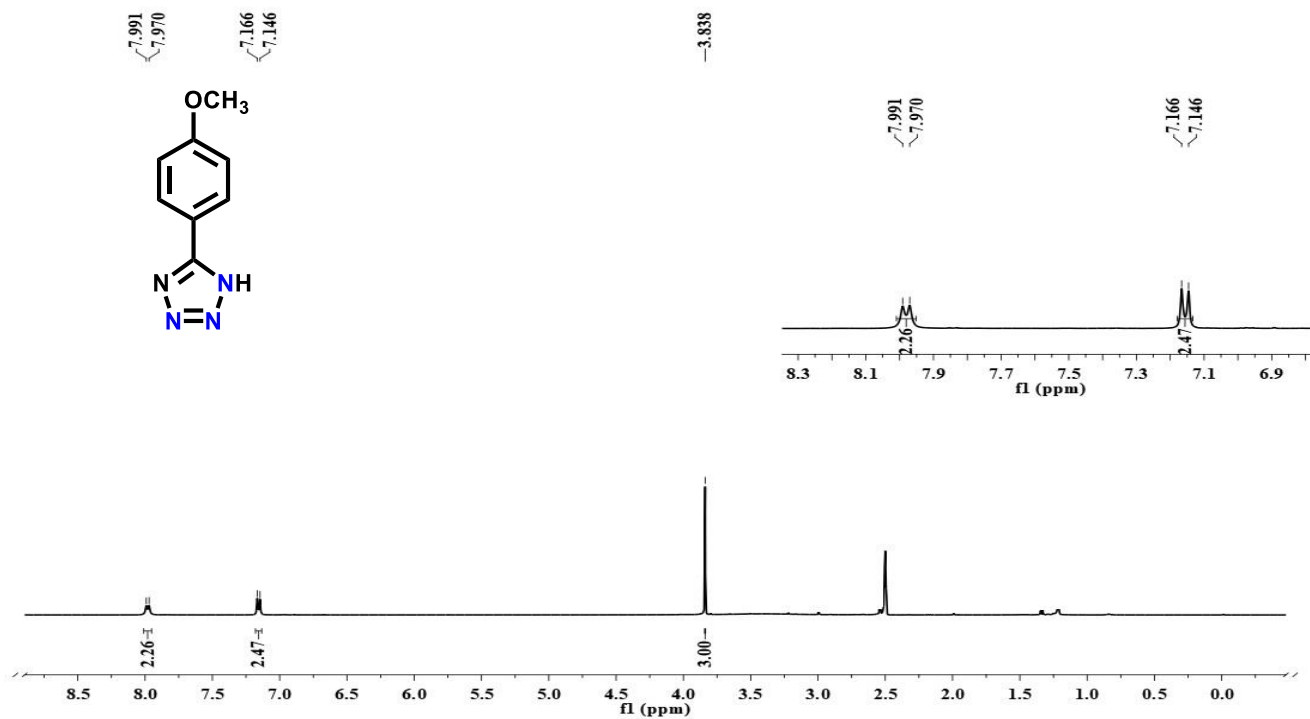

Figure S30: <sup>1</sup>H NMR spectrum of 3b taking DMSO as solvent.

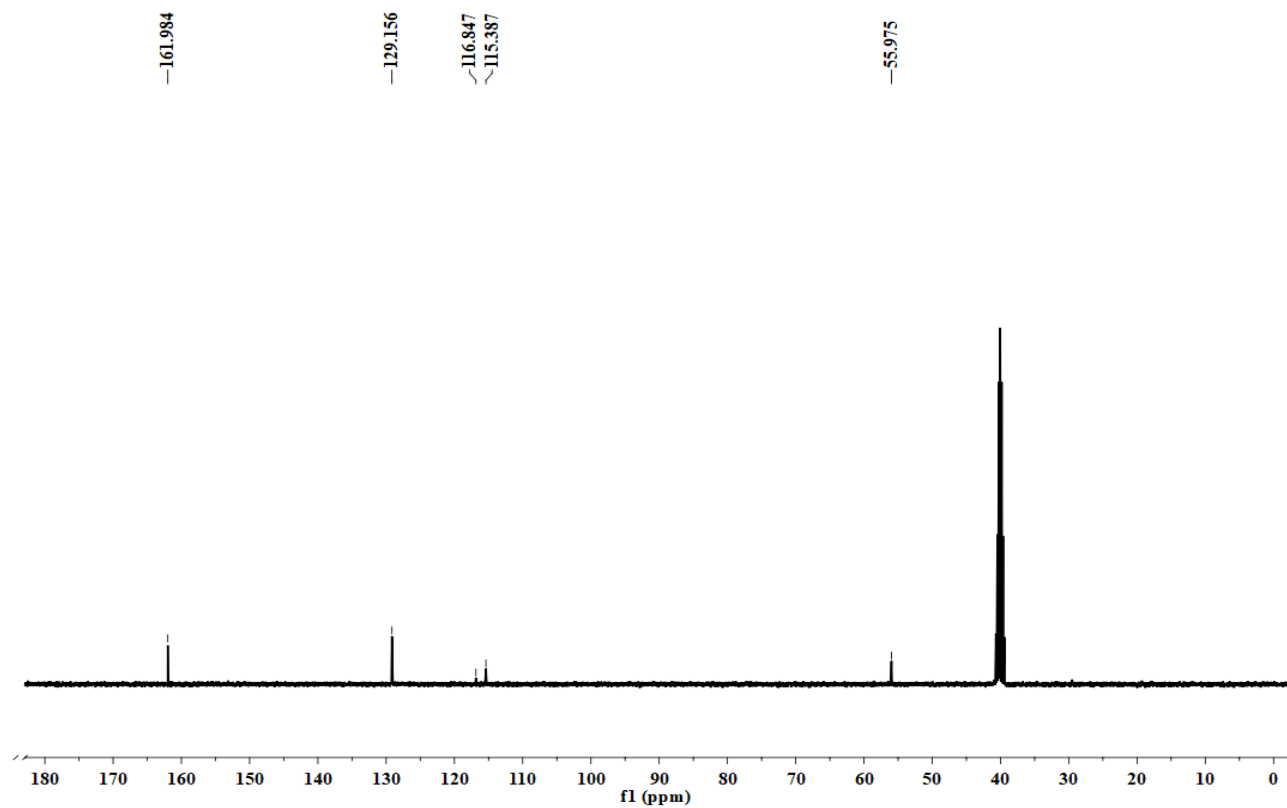

Figure S31: <sup>13</sup>C NMR spectrum of 3b taking DMSO as solvent.

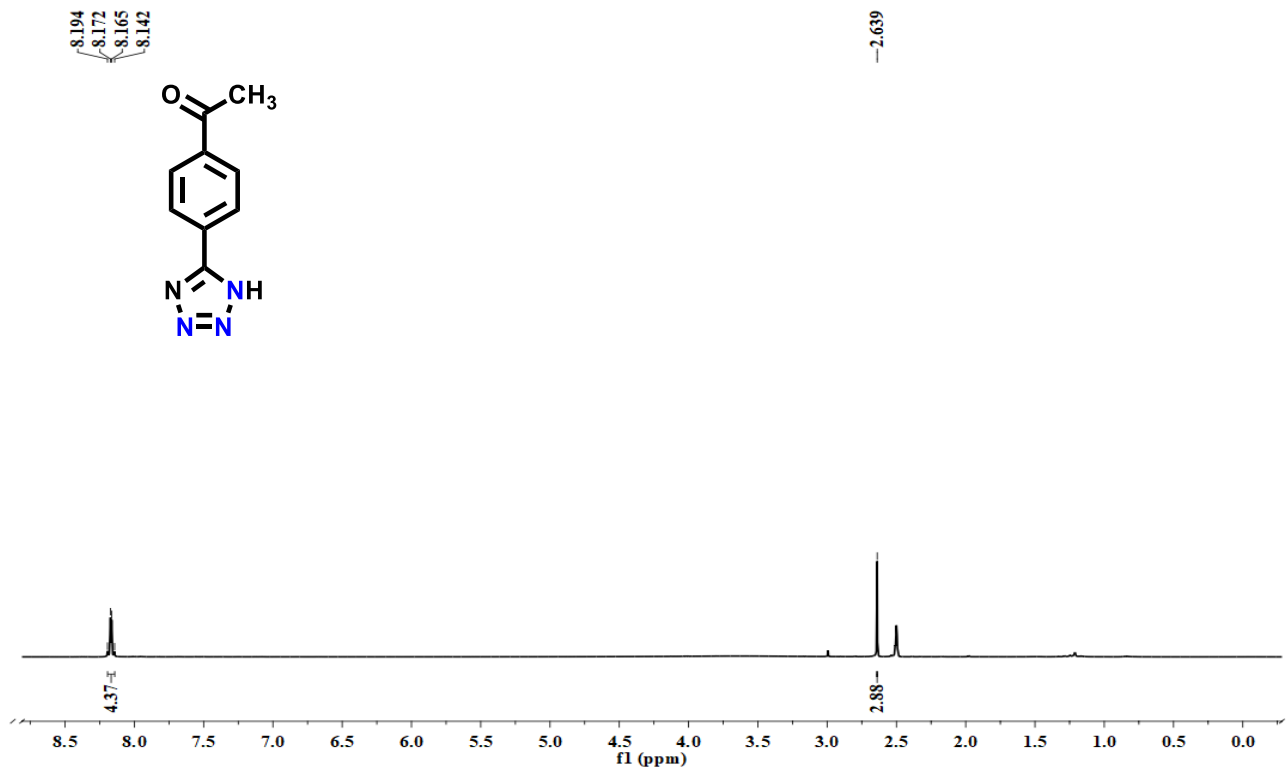

Figure S32: <sup>1</sup>H NMR spectrum of taking 3c DMSO as solvent.

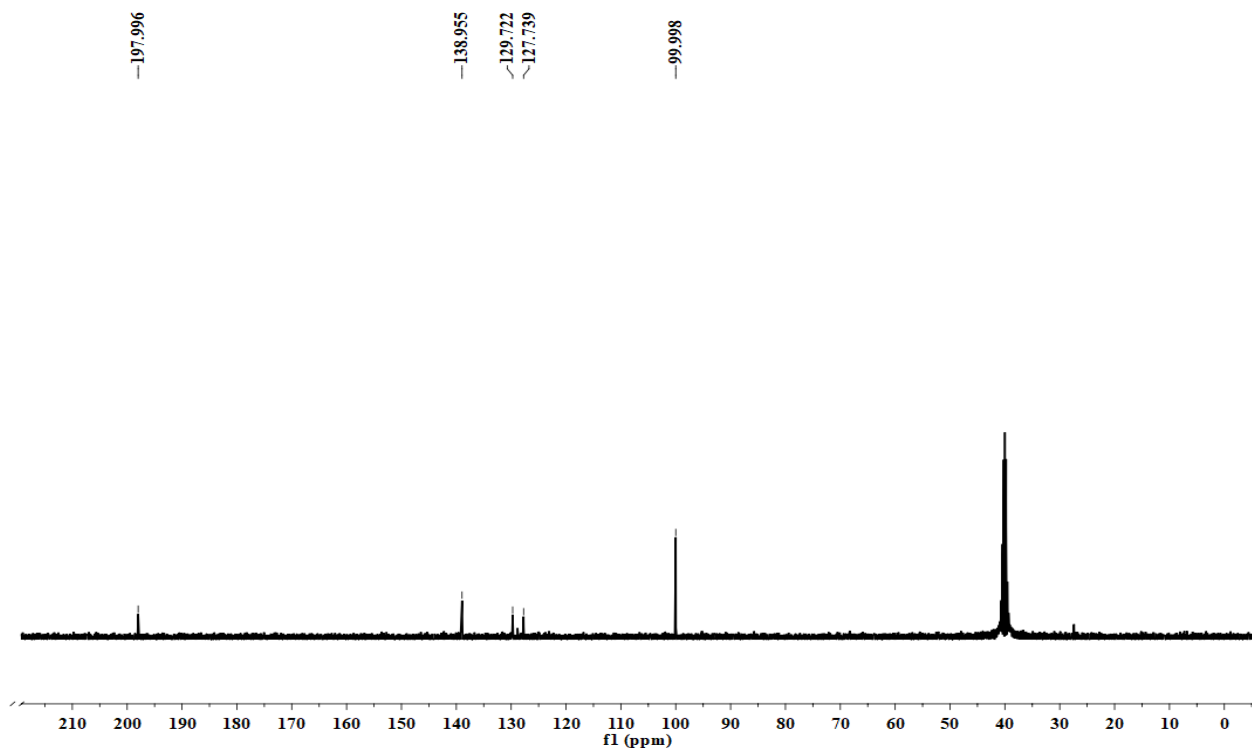

Figure S33: <sup>13</sup>C NMR spectrum of 3c taking DMSO as solvent.



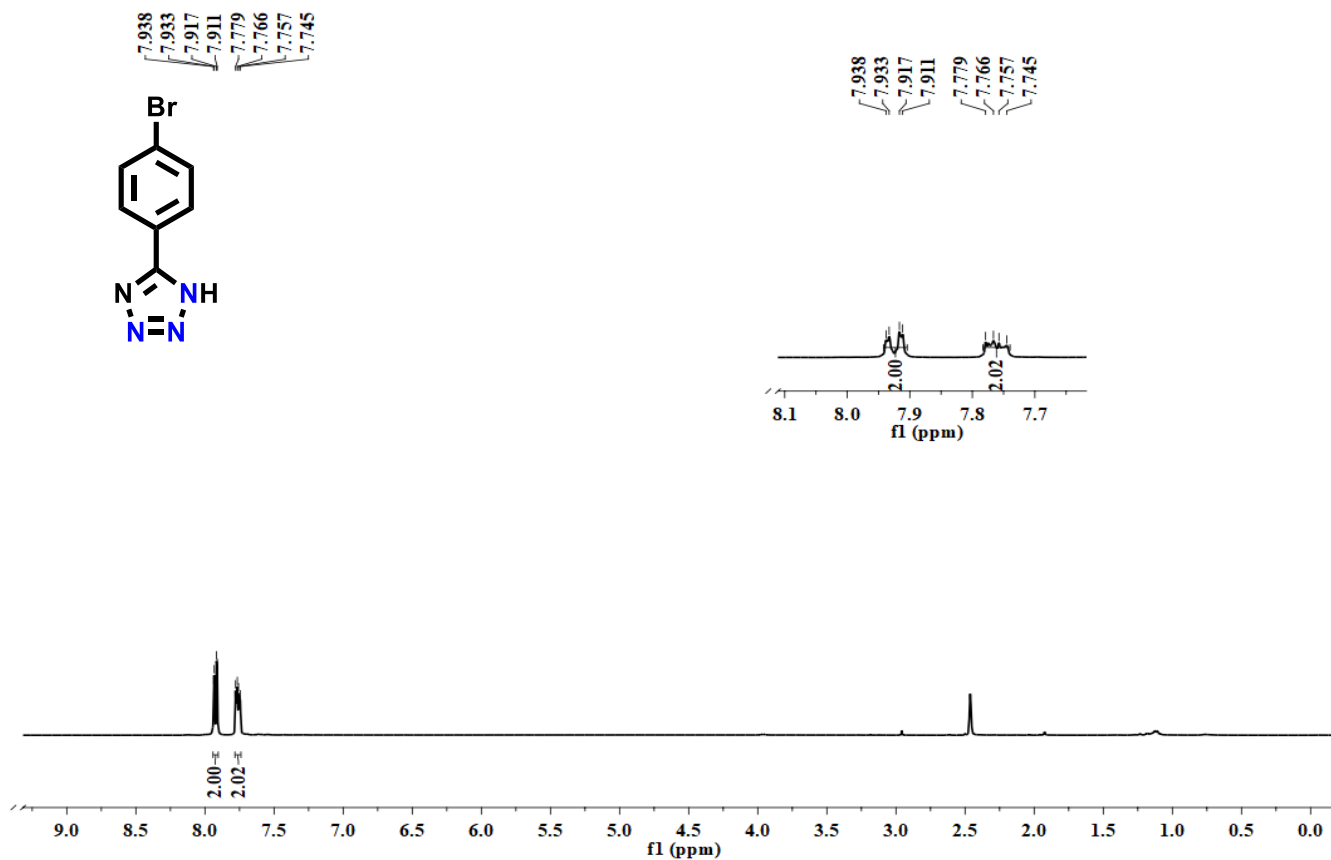

Figure S34: <sup>1</sup>H NMR spectrum of 3d taking DMSO as solvent.

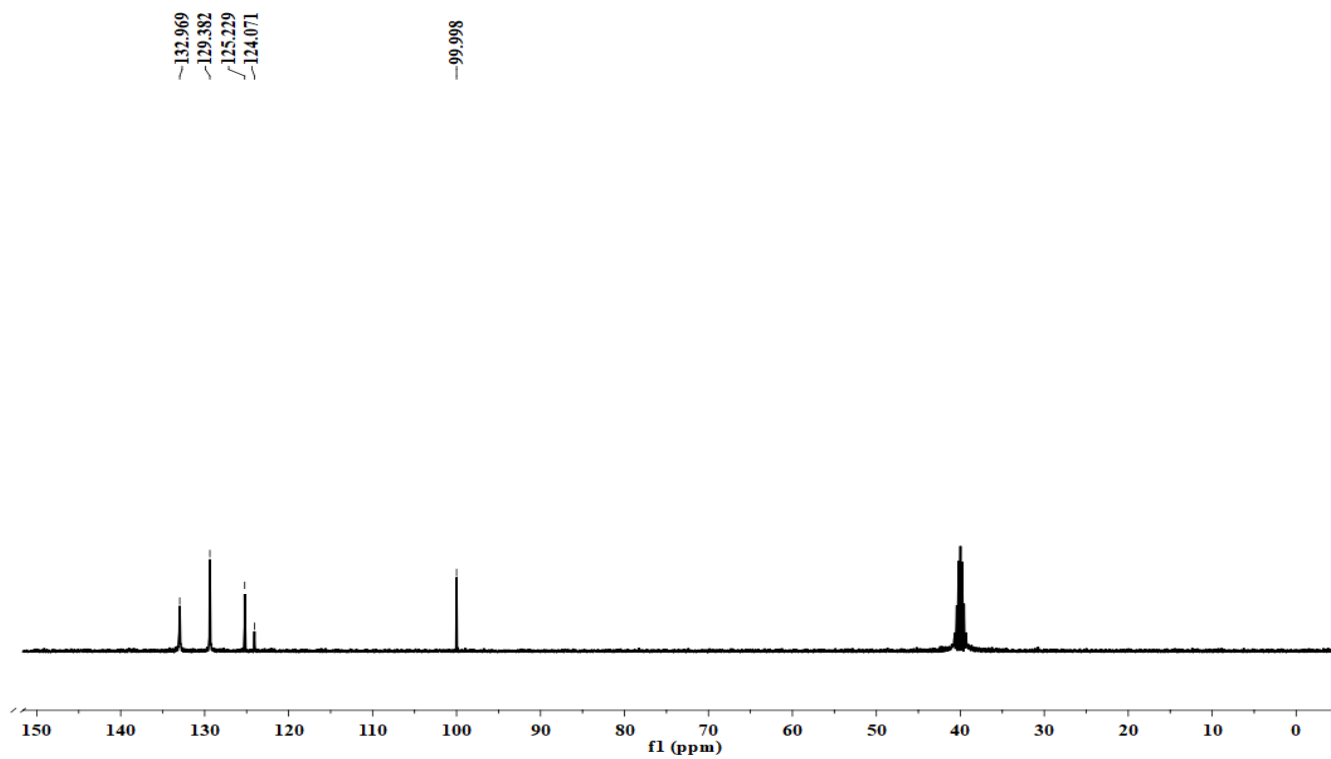

Figure S35: <sup>13</sup>C NMR spectrum of 3d taking DMSO as solvent.

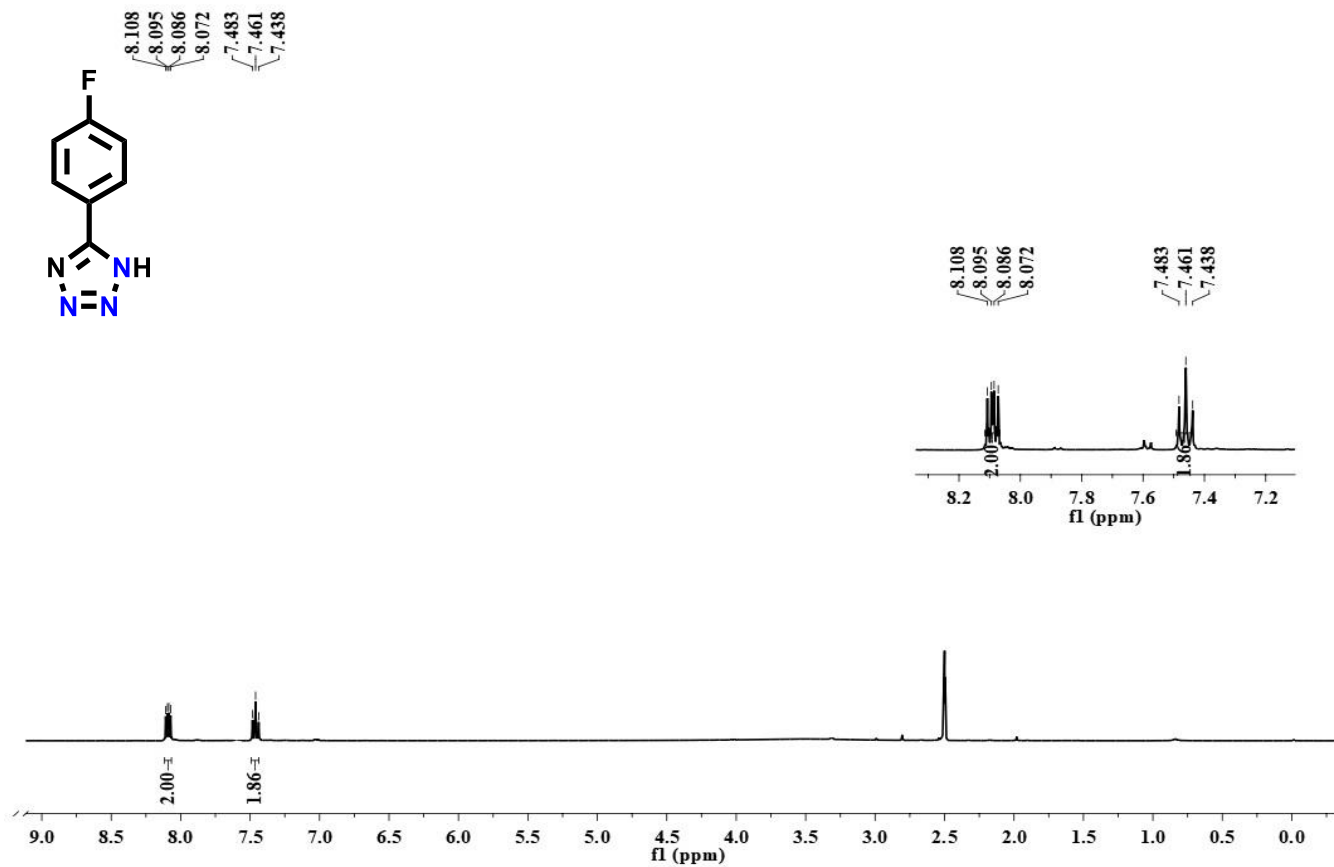

Figure S36: <sup>1</sup>H NMR spectrum of 3e taking DMSO as solvent.

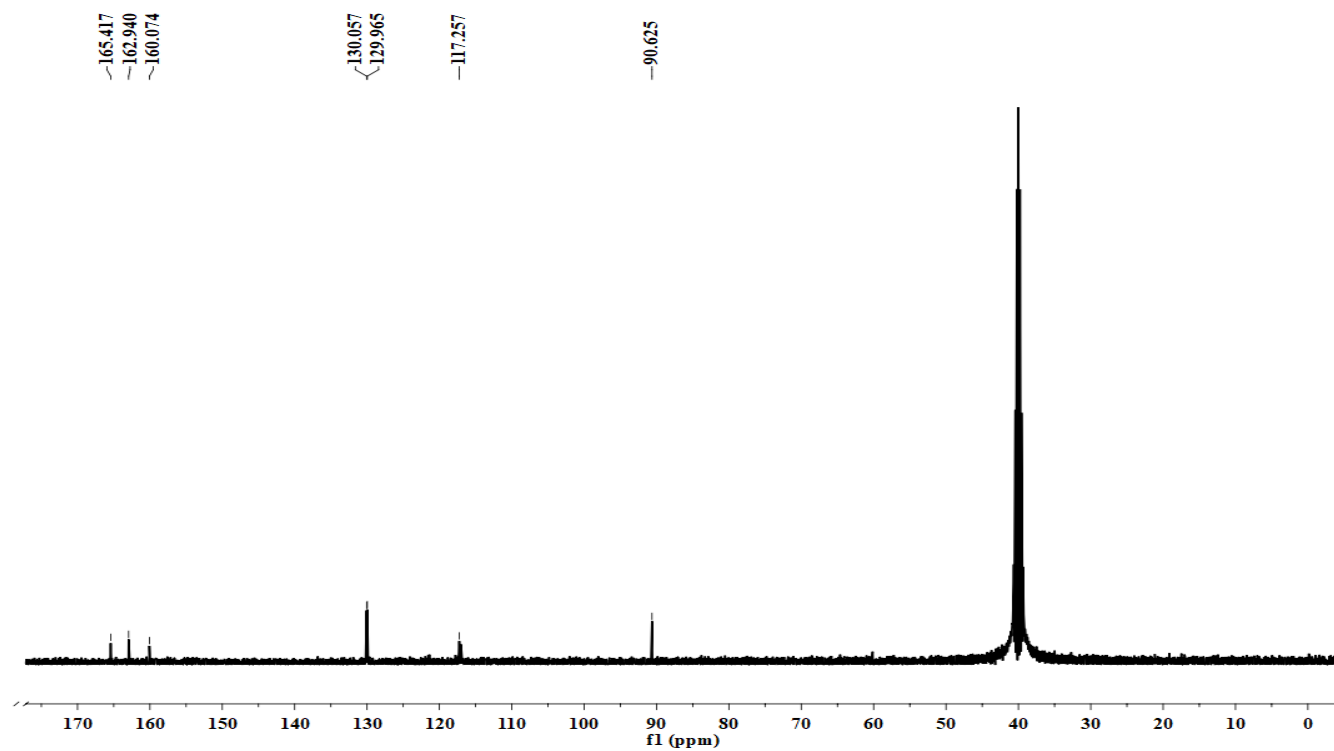

Figure S37: <sup>13</sup>C NMR spectrum of 3e taking DMSO as solvent.

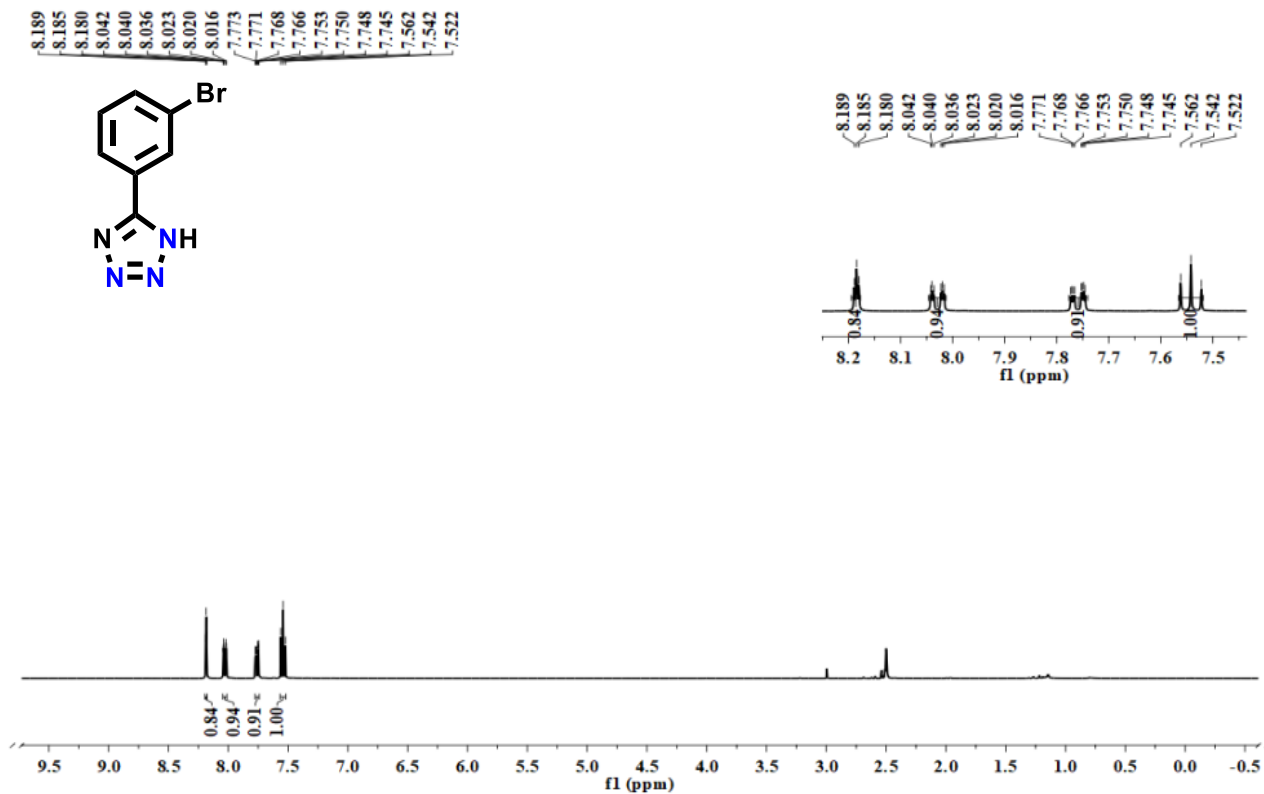

Figure S38: <sup>1</sup>H NMR spectrum of 3f taking DMSO as solvent.

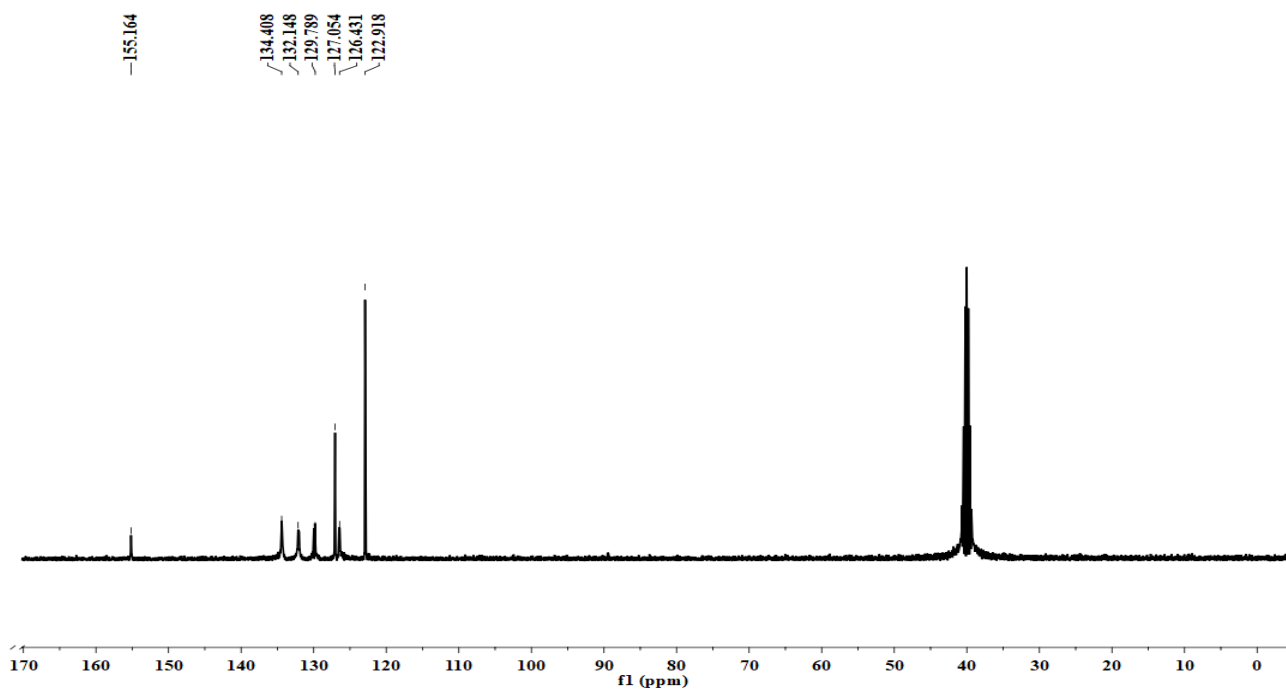

Figure S39: <sup>13</sup>C NMR spectrum of 3f taking DMSO as solvent.

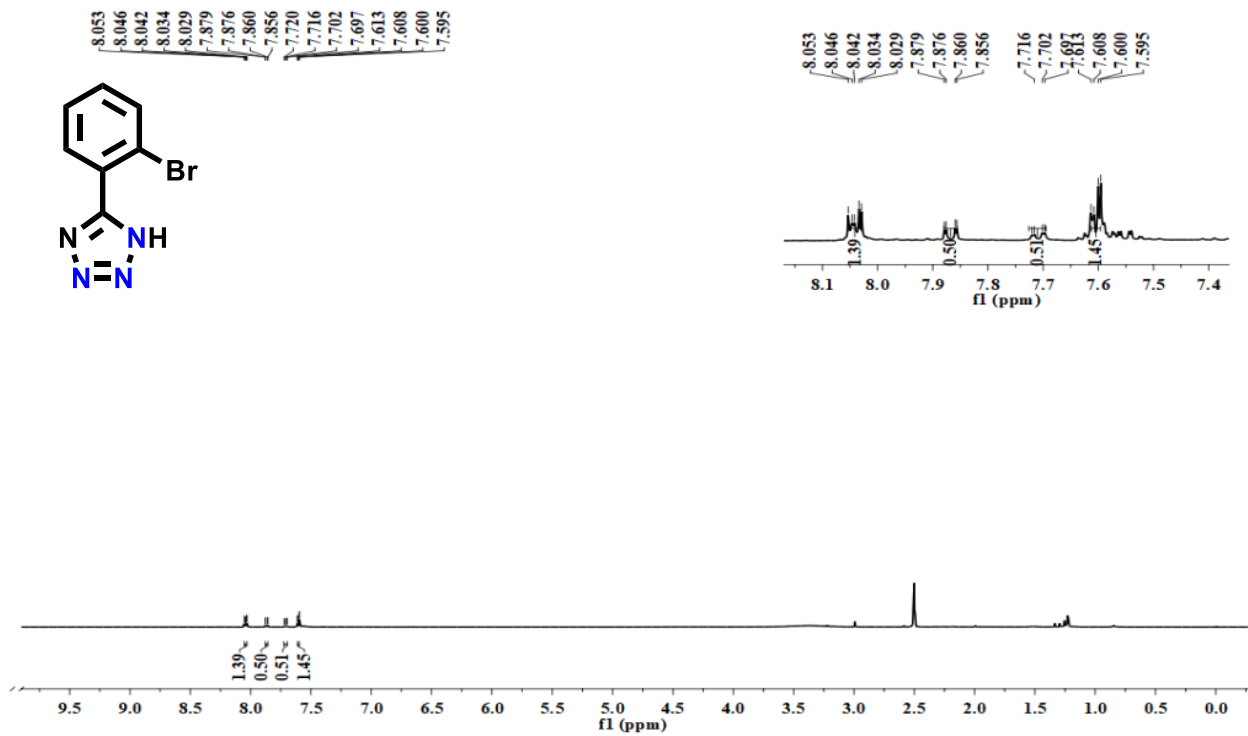

Figure S40: <sup>1</sup>H NMR spectrum of 3g taking DMSO as solvent.

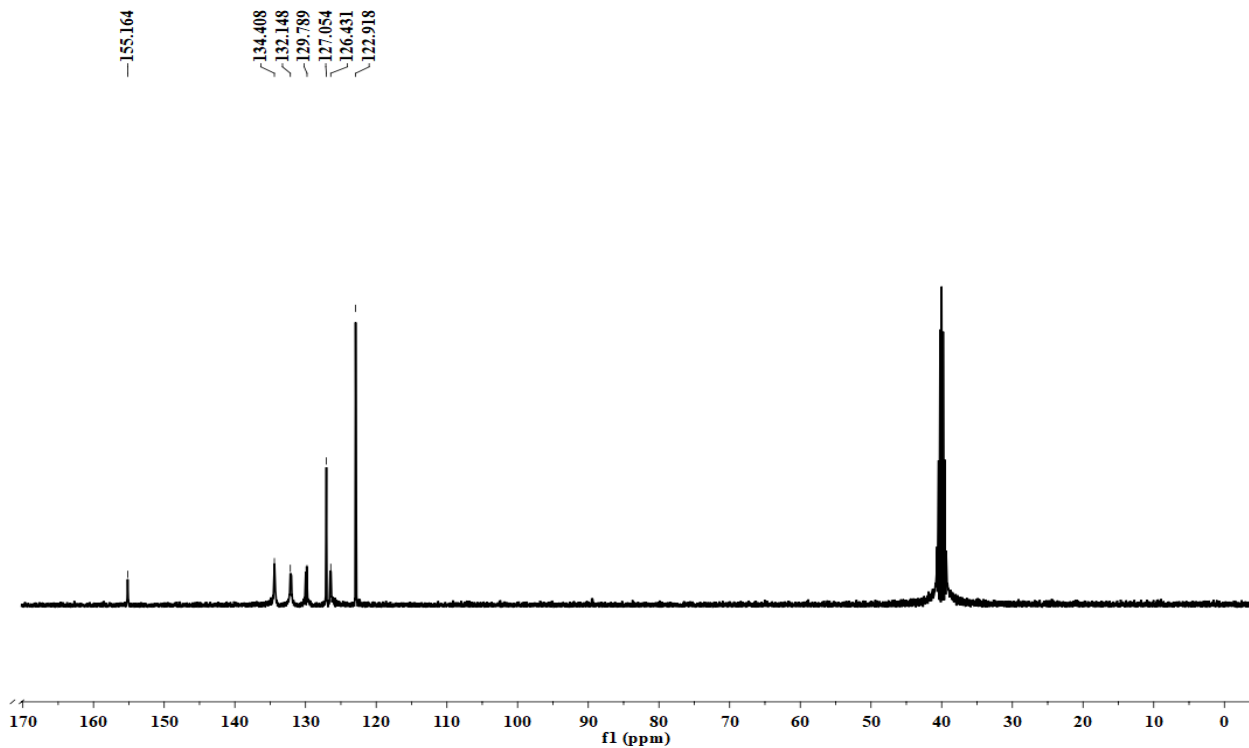

Figure S41: <sup>13</sup>C NMR spectrum of 3g taking DMSO as solvent.

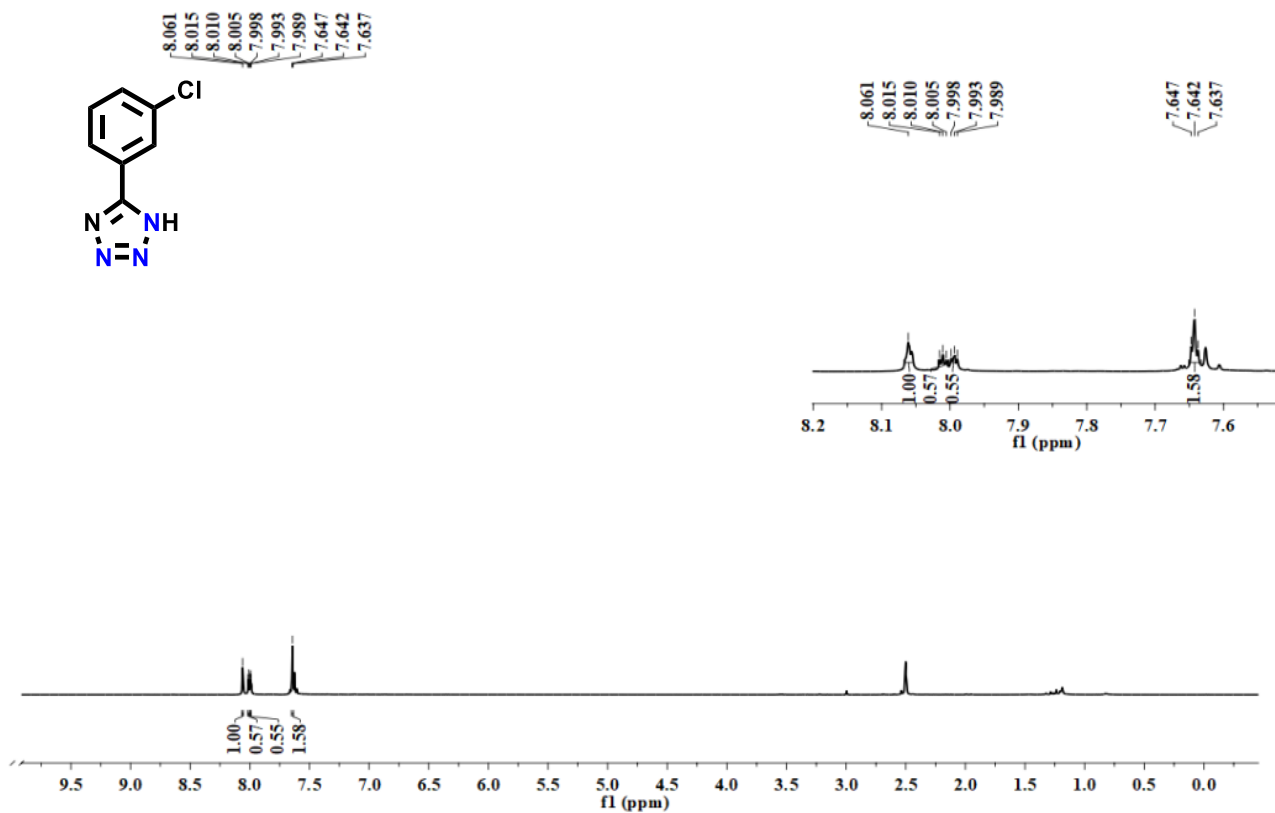

Figure S42: <sup>1</sup>H NMR spectrum of 3h taking DMSO as solvent

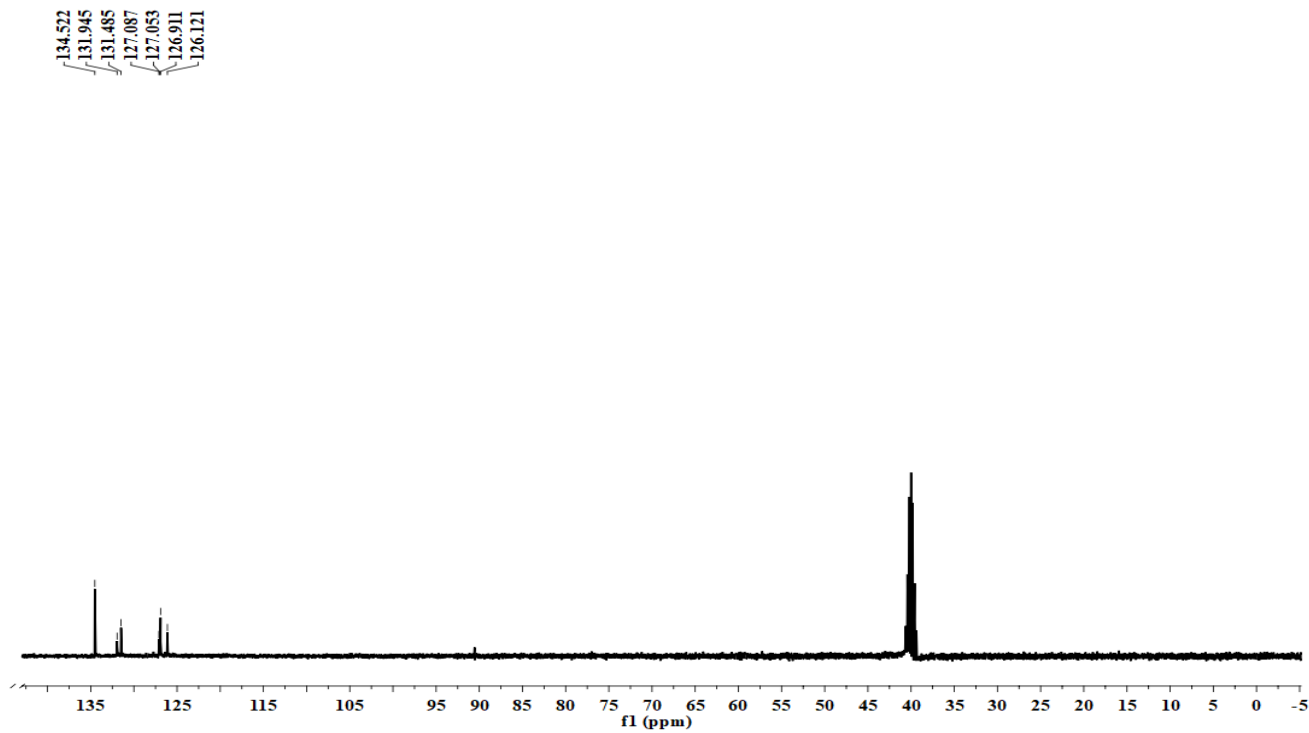

Figure S43: <sup>13</sup>C NMR spectrum of 3h taking DMSO as solvent.

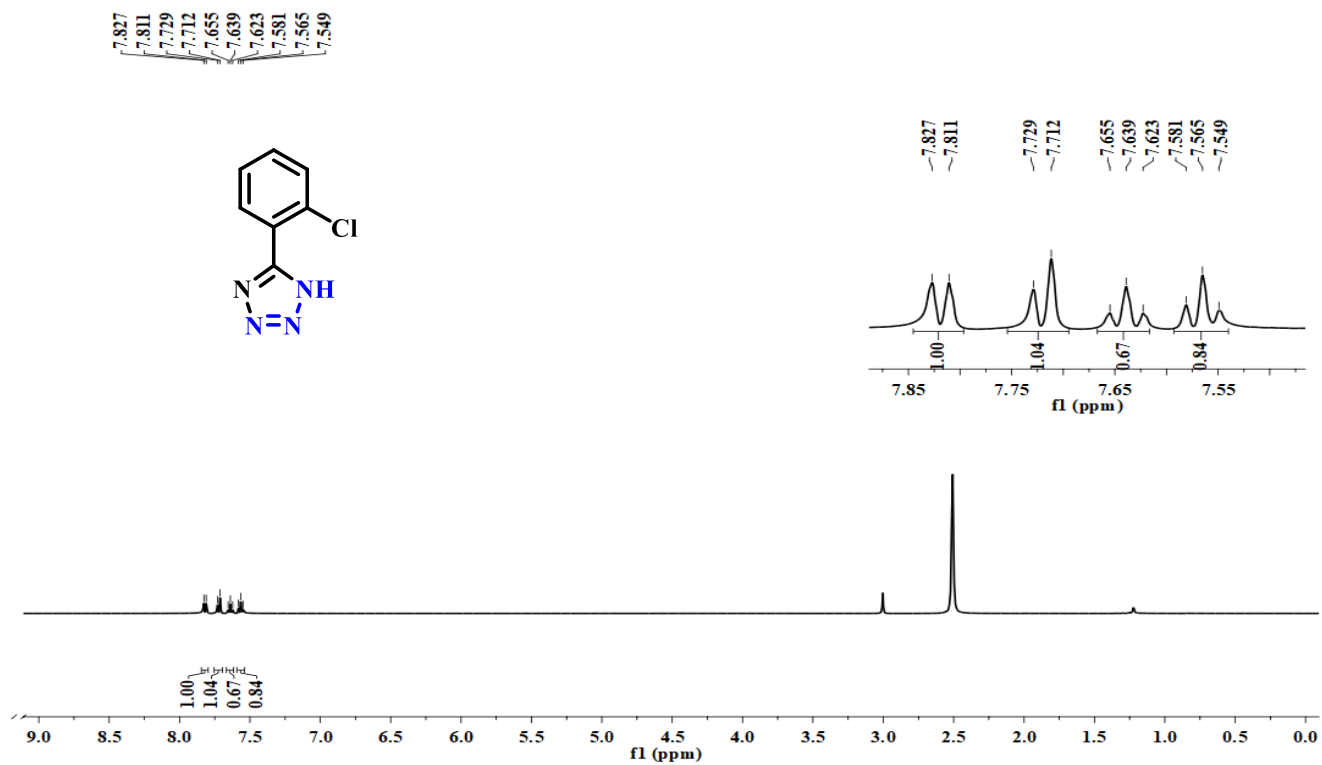

Figure S44: <sup>1</sup>H NMR spectrum of 3i taking DMSO as solvent

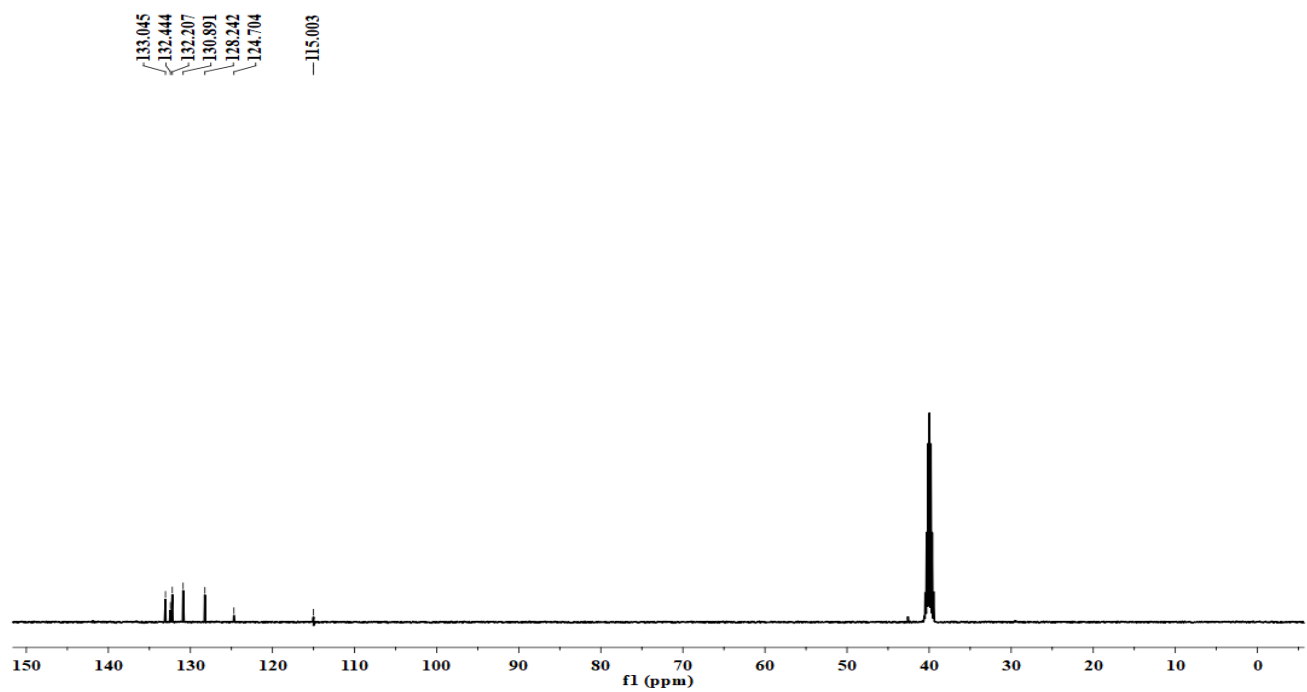

Figure S45: <sup>13</sup>C NMR spectrum of 3i taking DMSO as solvent.

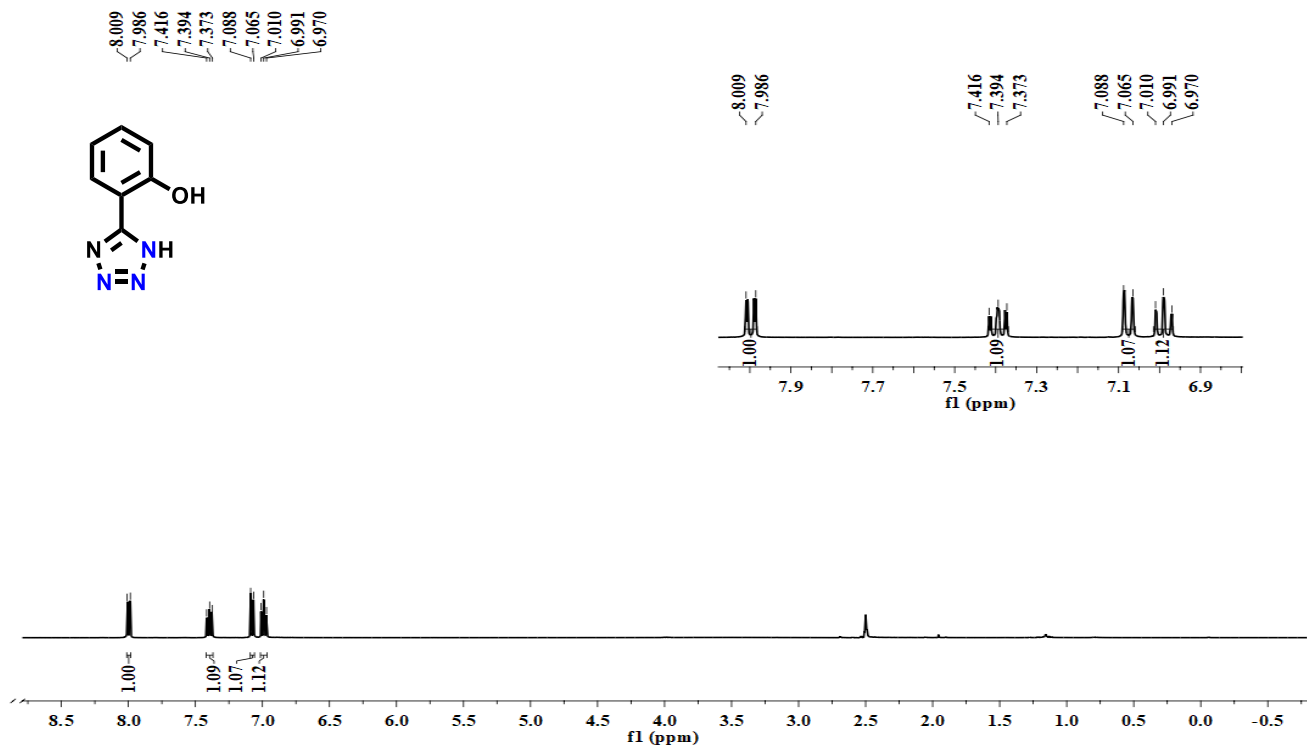

Figure S46: <sup>1</sup>H NMR spectrum of 3j taking DMSO as solvent

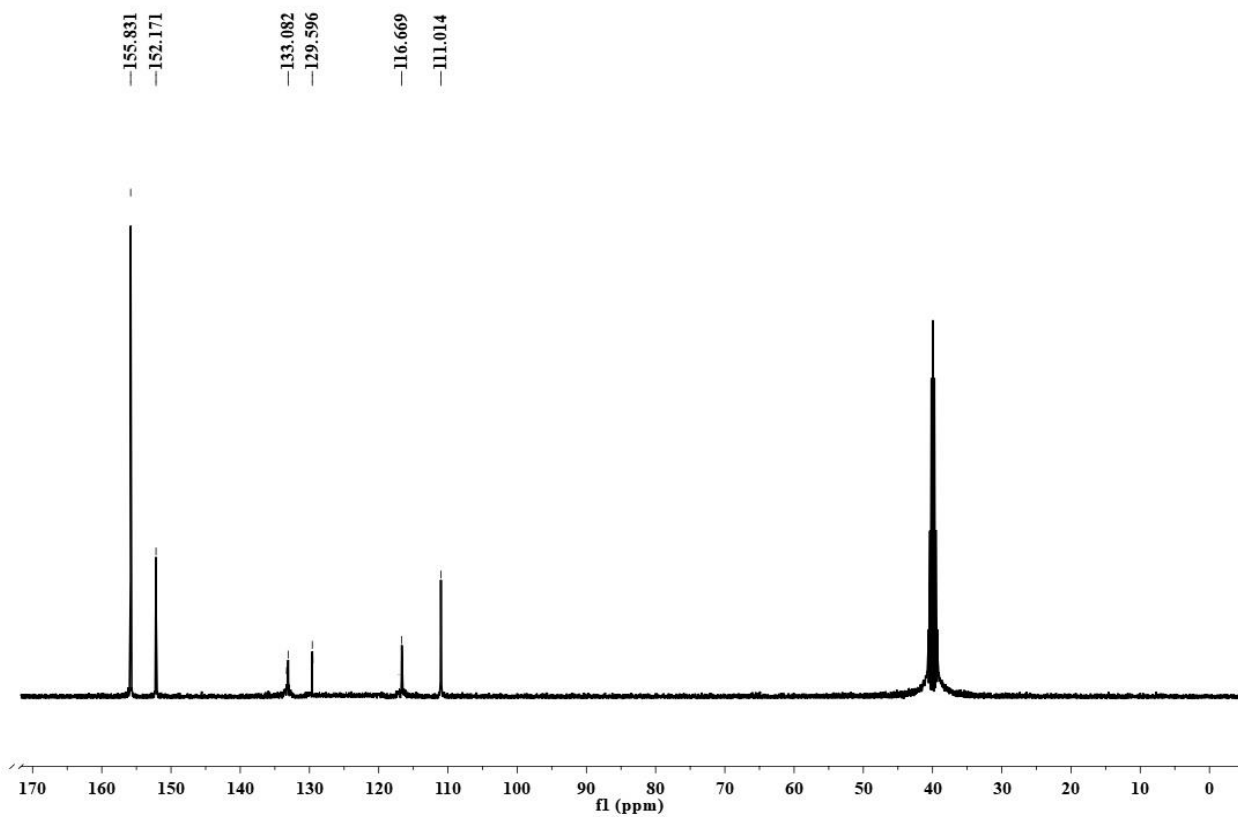

Figure S47: <sup>13</sup>C NMR spectrum of 3j taking DMSO as solvent.

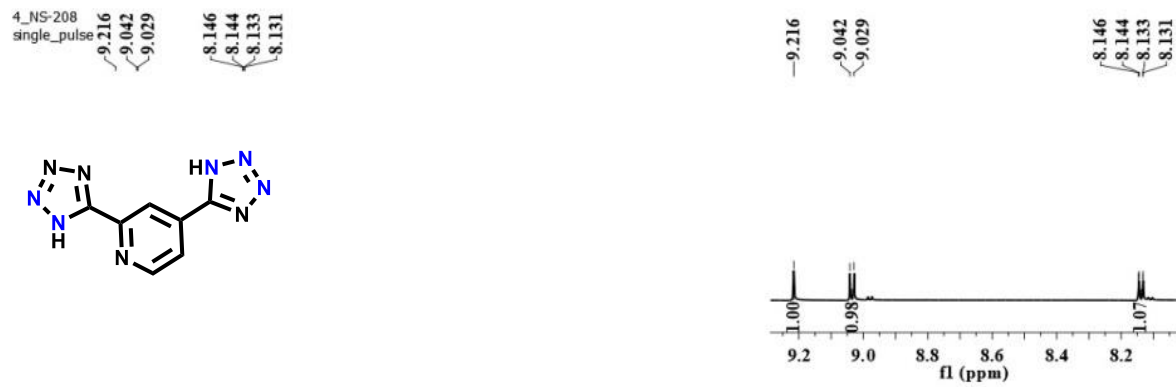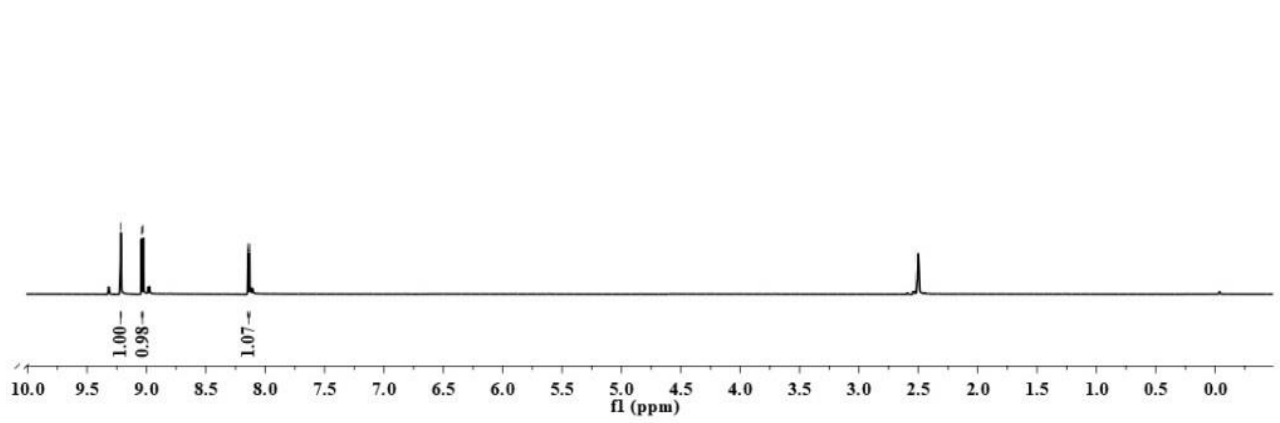

Figure S48: <sup>1</sup>H NMR spectrum of 3k taking DMSO as solvent

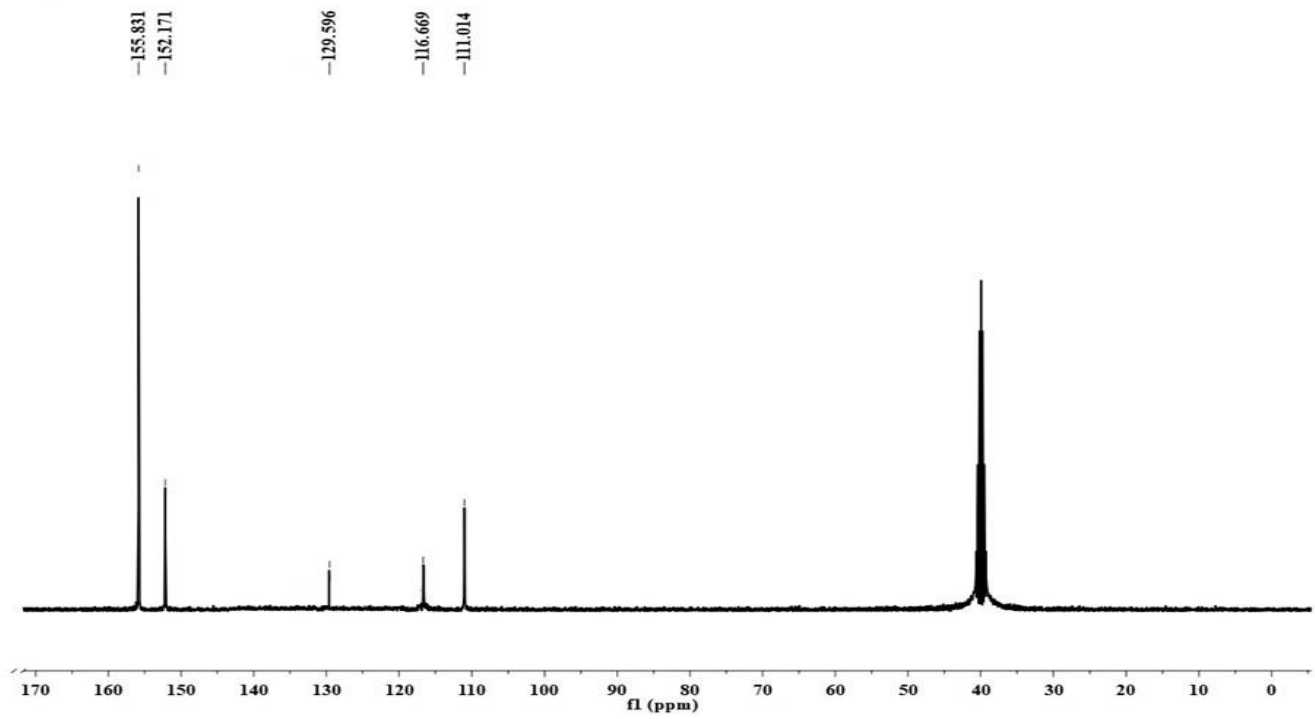

Figure S49: <sup>13</sup>C NMR spectrum of 3k taking DMSO as solvent.



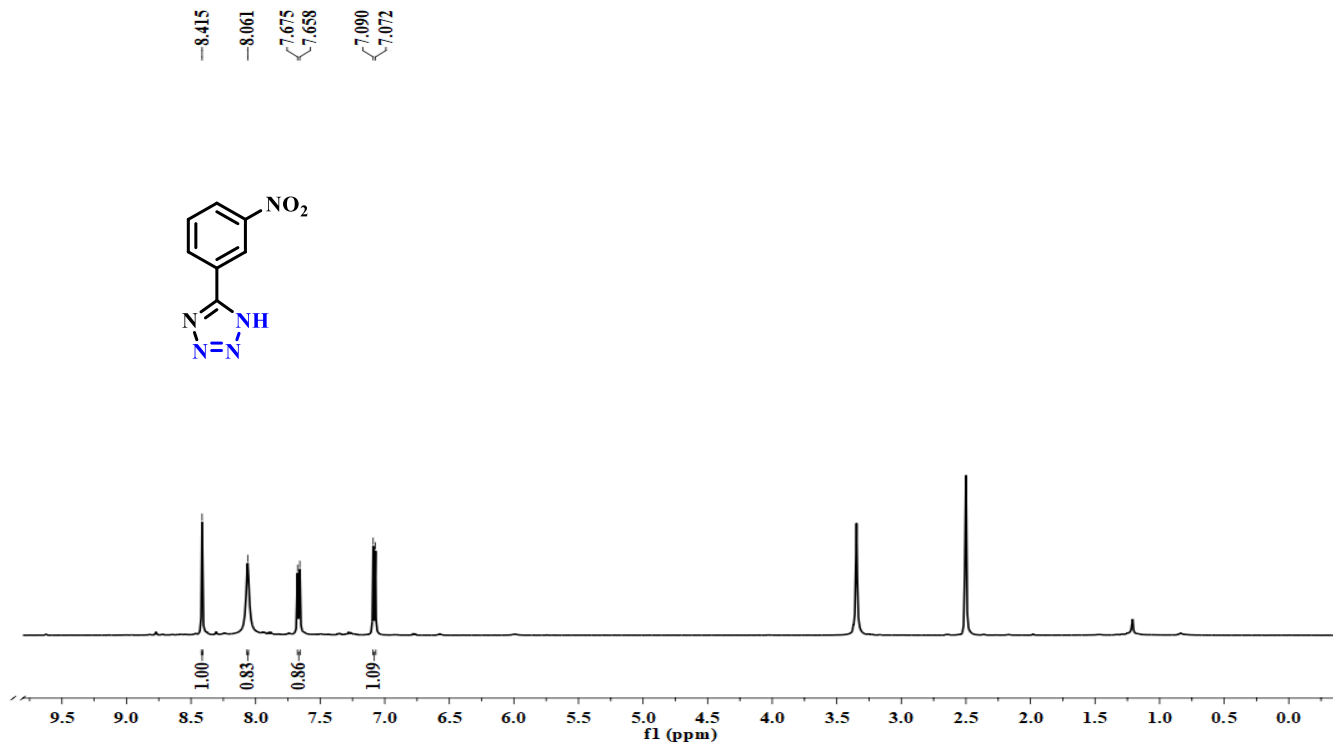

Figure S50:  $^1\text{H}$  NMR spectrum of 3l taking DMSO as solvent

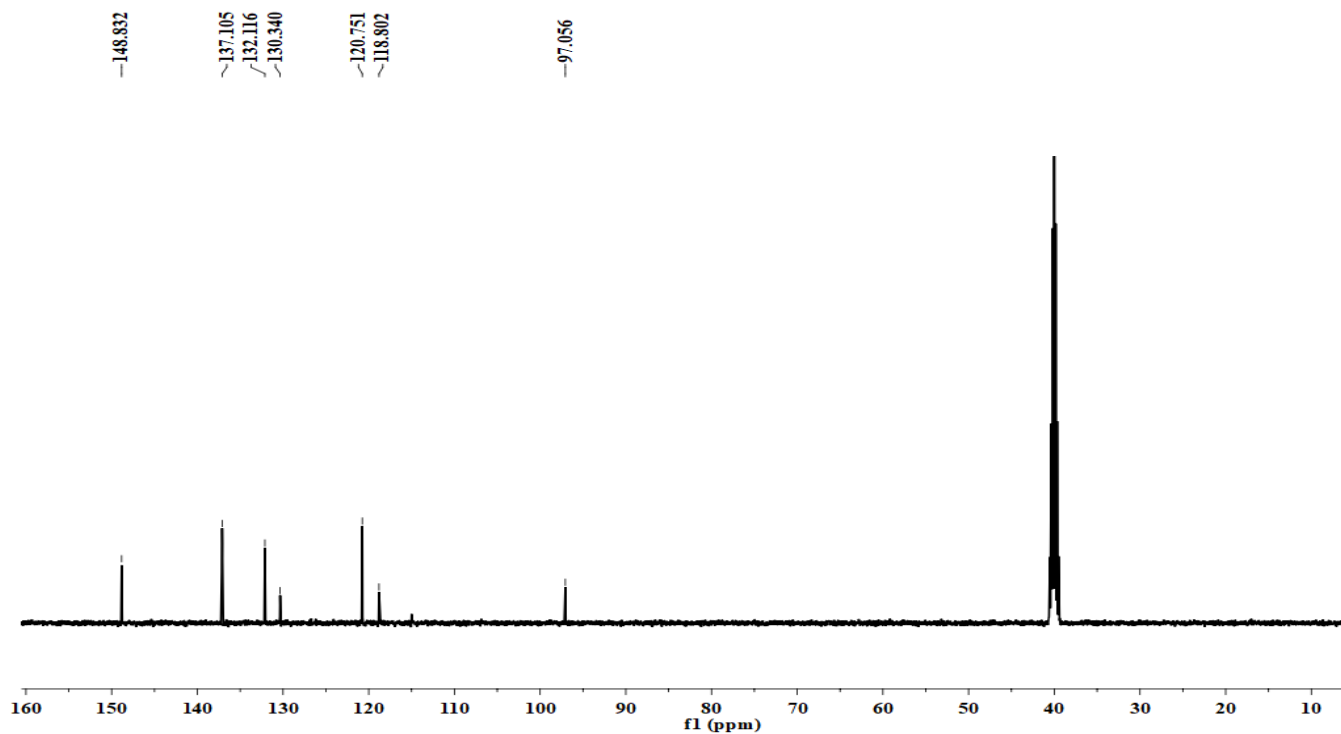

Figure S51:  $^{13}\text{C}$  NMR spectrum of 3l taking DMSO as solvent.

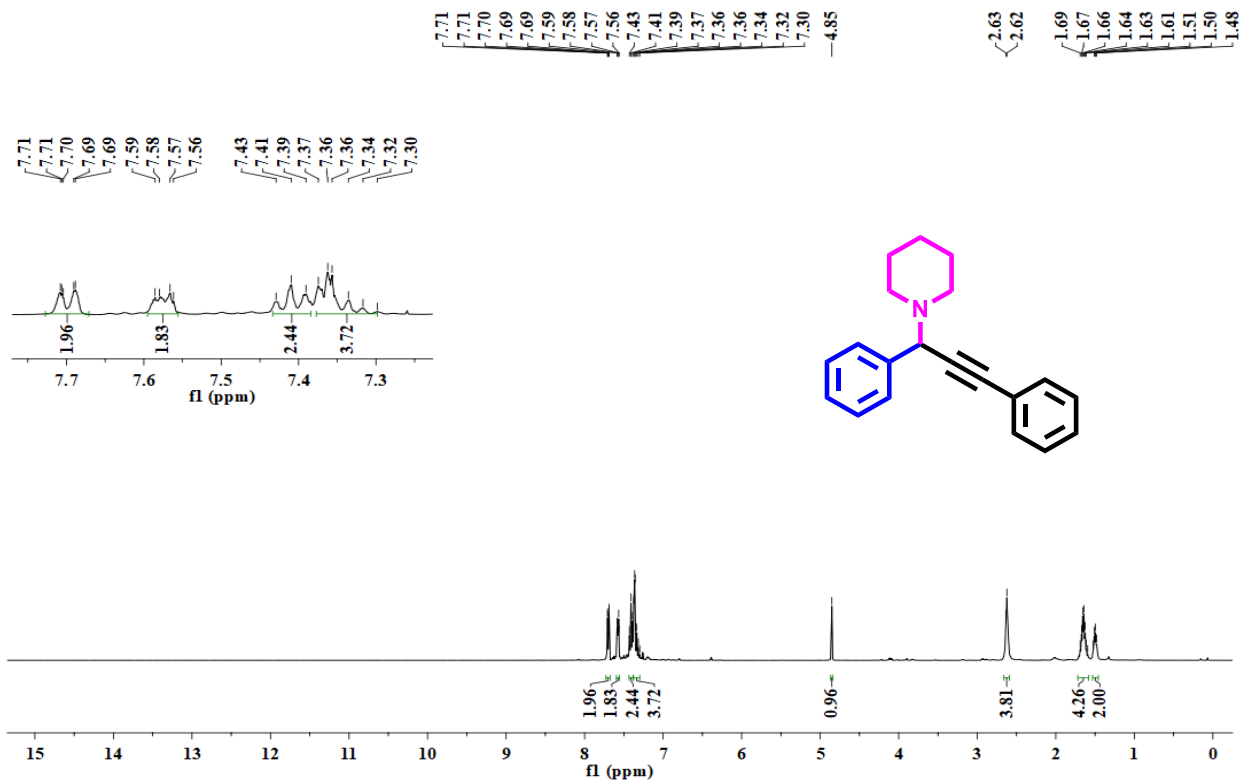

Figure S52: <sup>1</sup>H NMR spectrum 7aa of taking CDCl<sub>3</sub> as solvent.

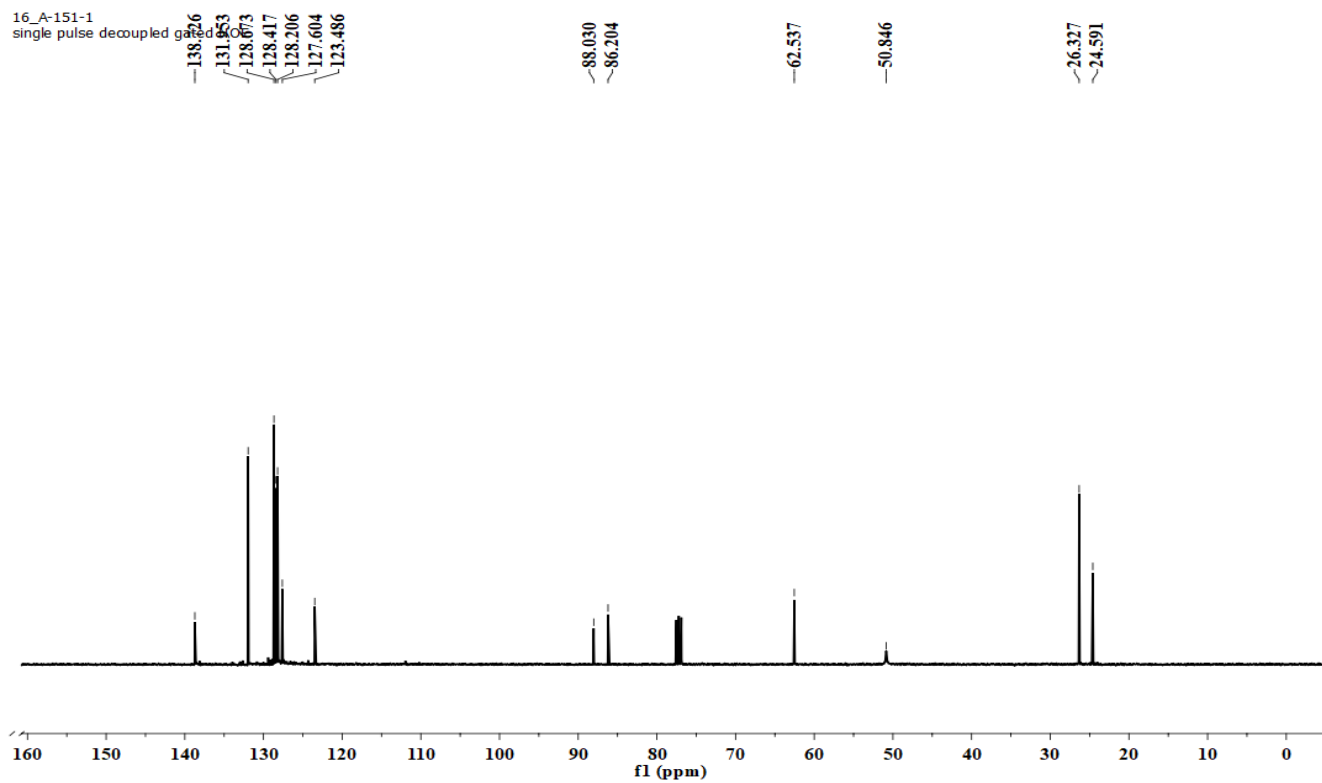

Figure S53: <sup>13</sup>C NMR spectrum of 7aa taking CDCl<sub>3</sub> as solvent.

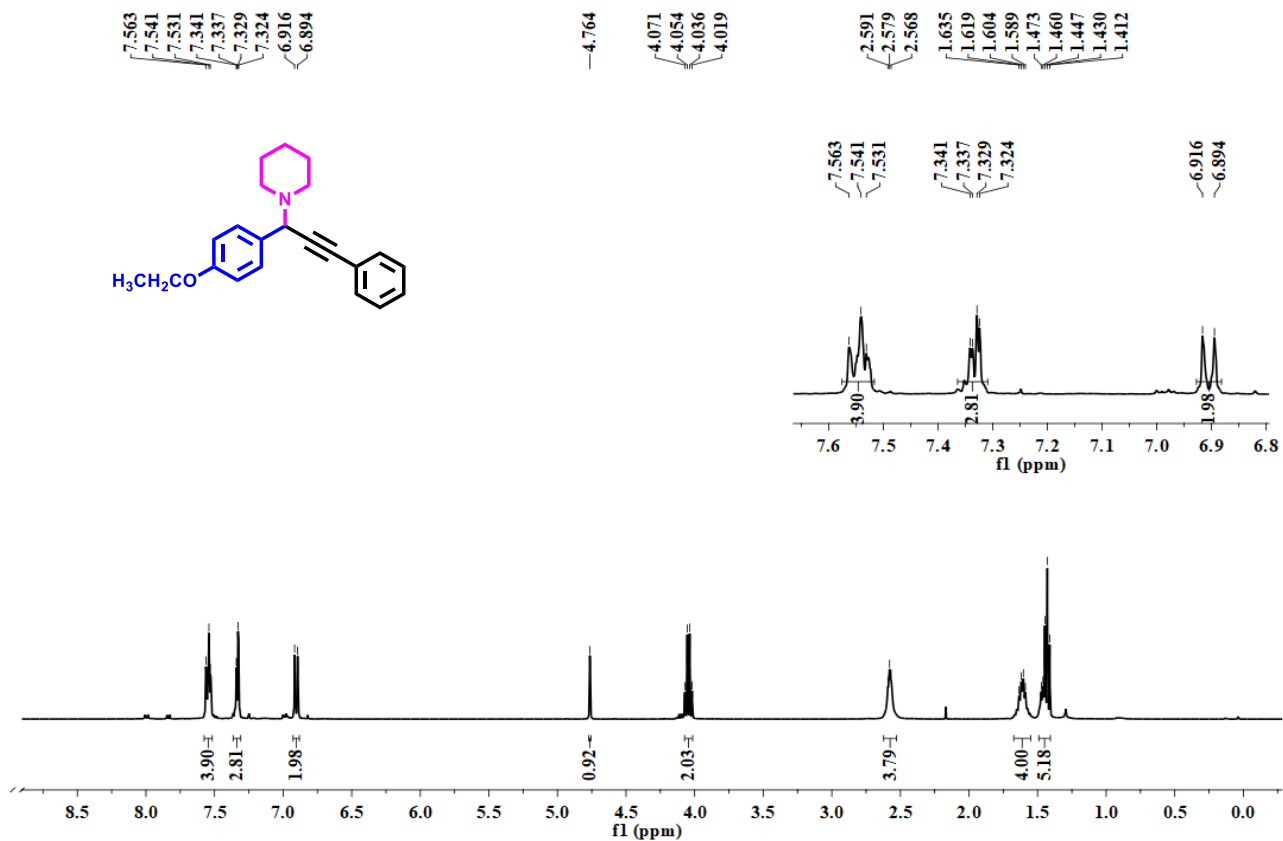

Figure S54: <sup>1</sup>H NMR spectrum of 7ab taking CDCl<sub>3</sub> as solvent.

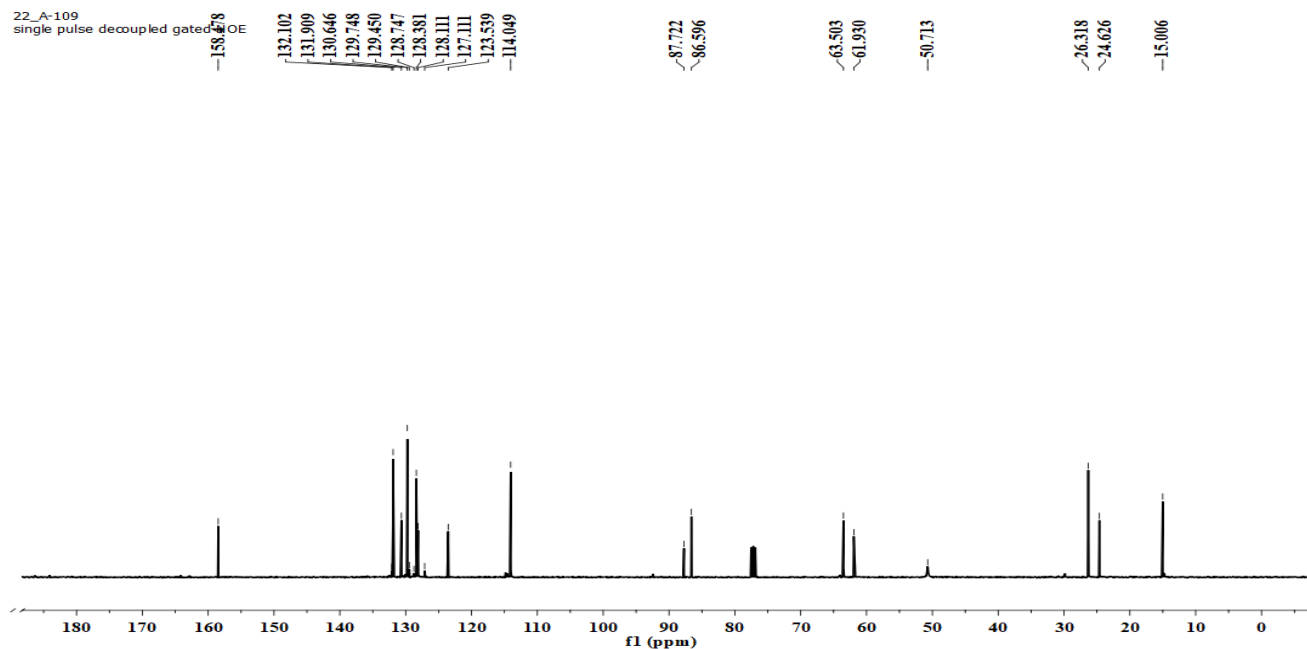

Figure S55: <sup>13</sup>C NMR spectrum of 7ab taking CDCl<sub>3</sub> as solvent.

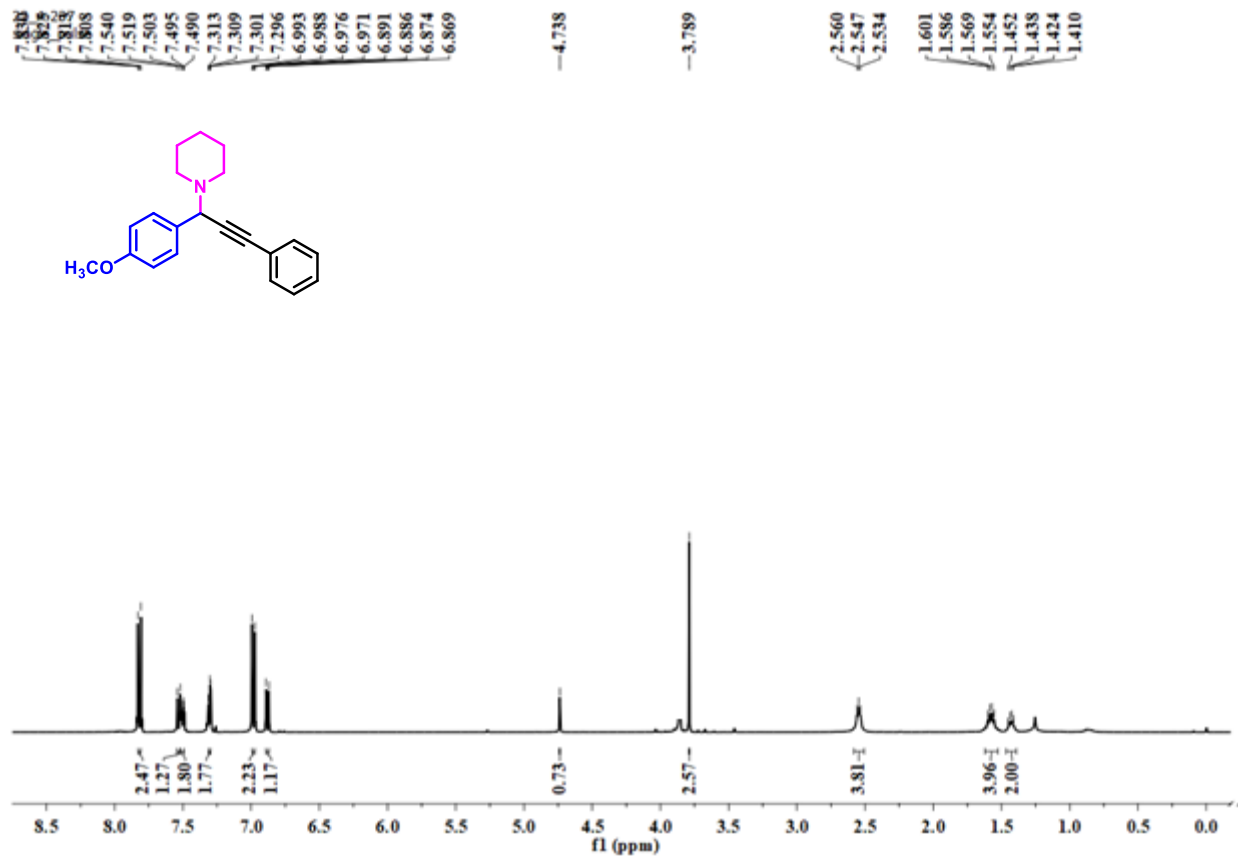

Figure S56: <sup>1</sup>H NMR spectrum of 7ac taking CDCl<sub>3</sub> as solvent.

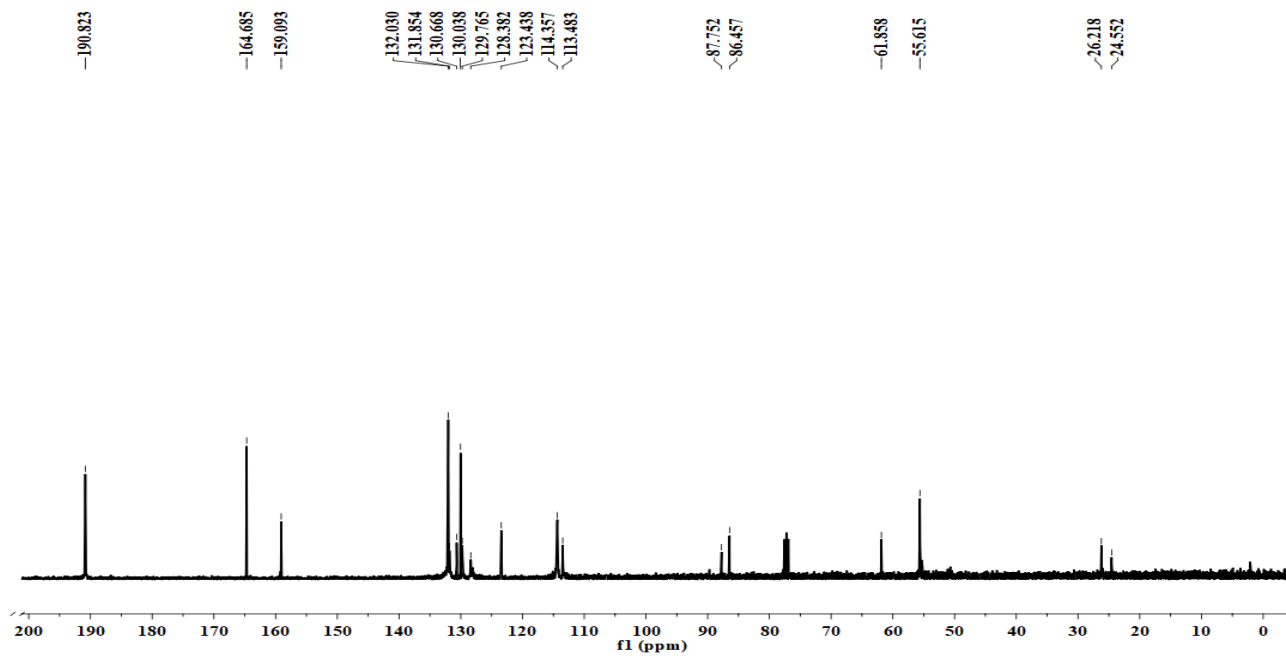

Figure S57: <sup>13</sup>C NMR spectrum of 7ac taking CDCl<sub>3</sub> as solvent.

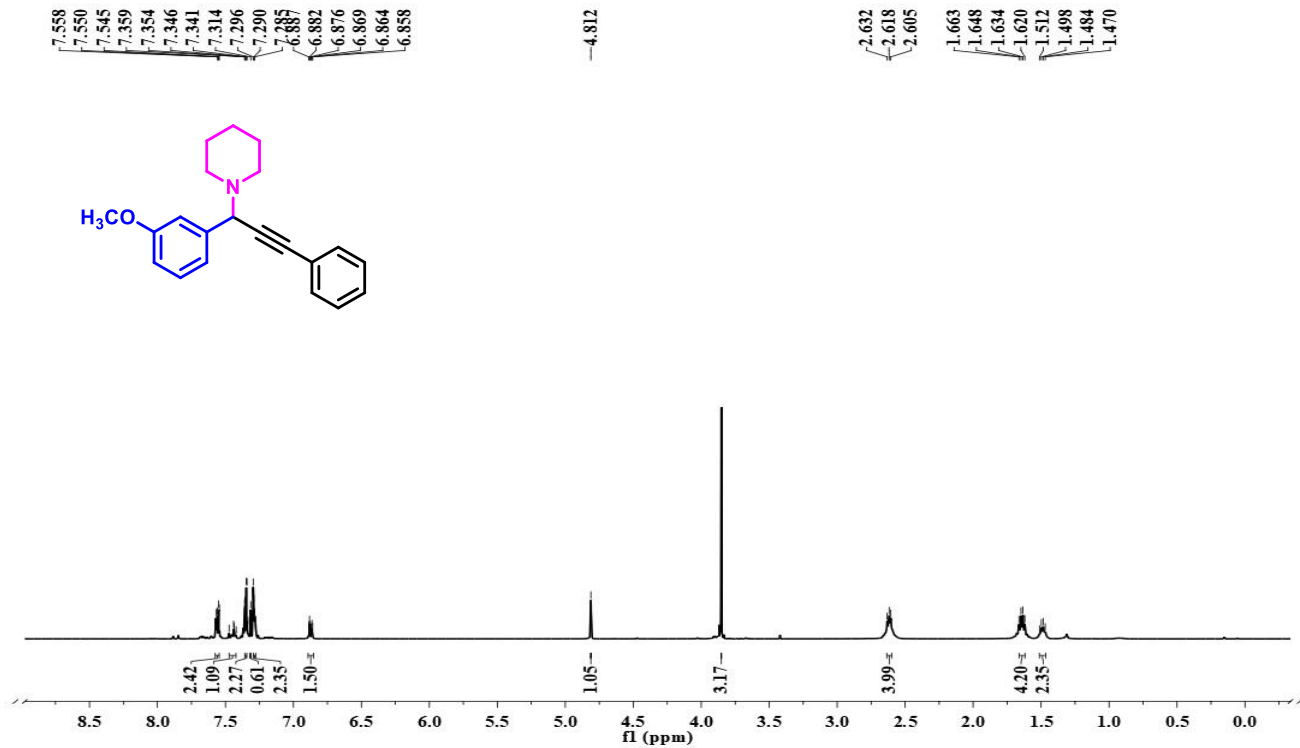

Figure S58: <sup>1</sup>H NMR spectrum of 7ad taking CDCl<sub>3</sub> as solvent.

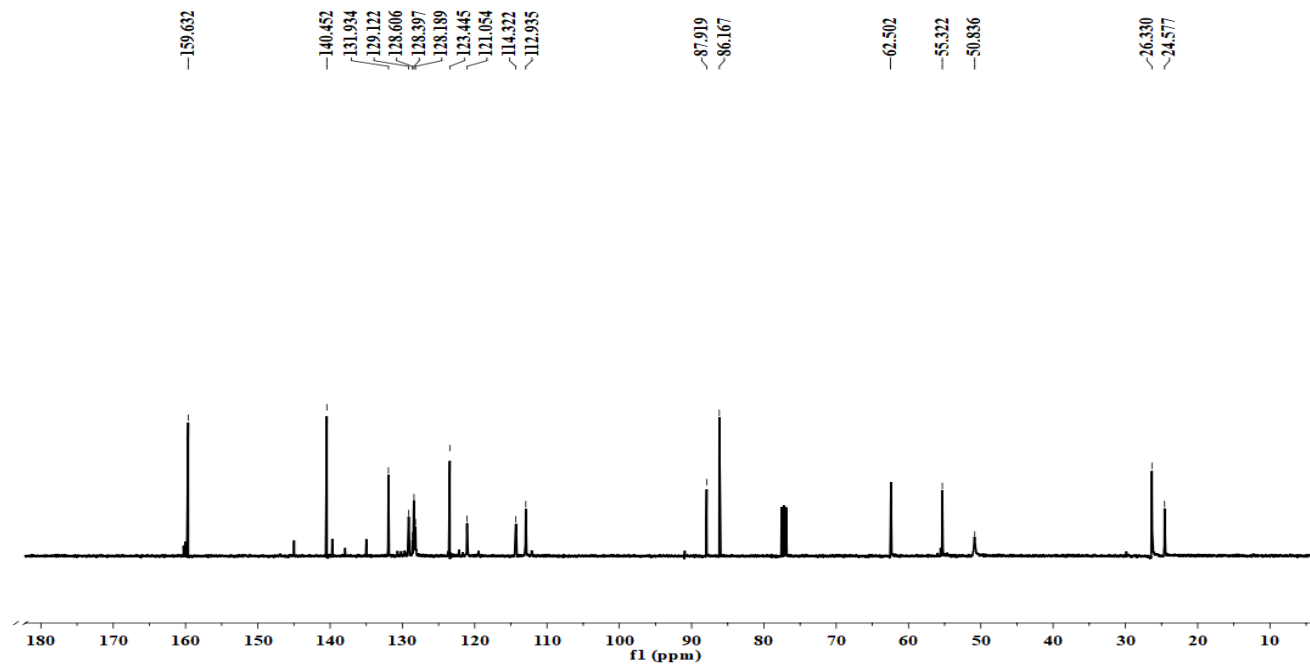

Figure S59: <sup>13</sup>C NMR spectrum of 7ad taking CDCl<sub>3</sub> as solvent.

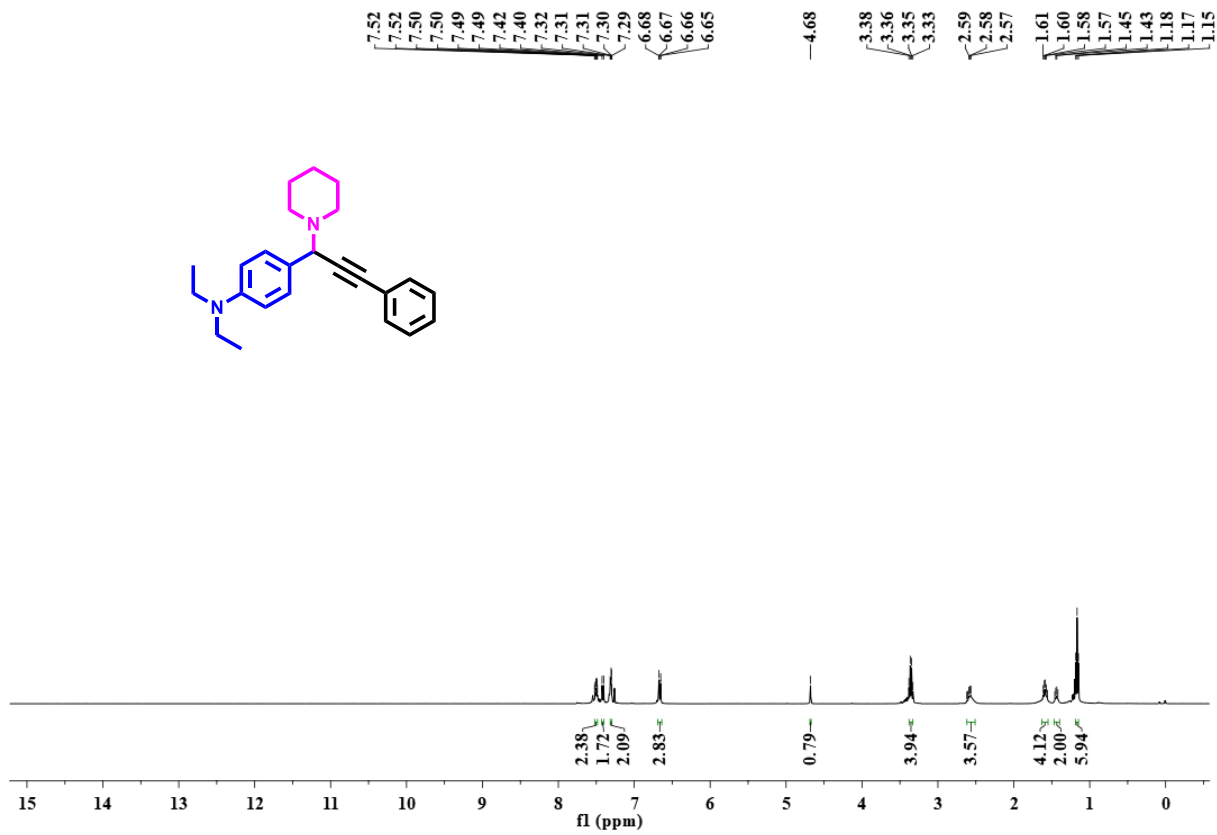

Figure S60: <sup>1</sup>H NMR spectrum of 7ae taking CDCl<sub>3</sub> as solvent.

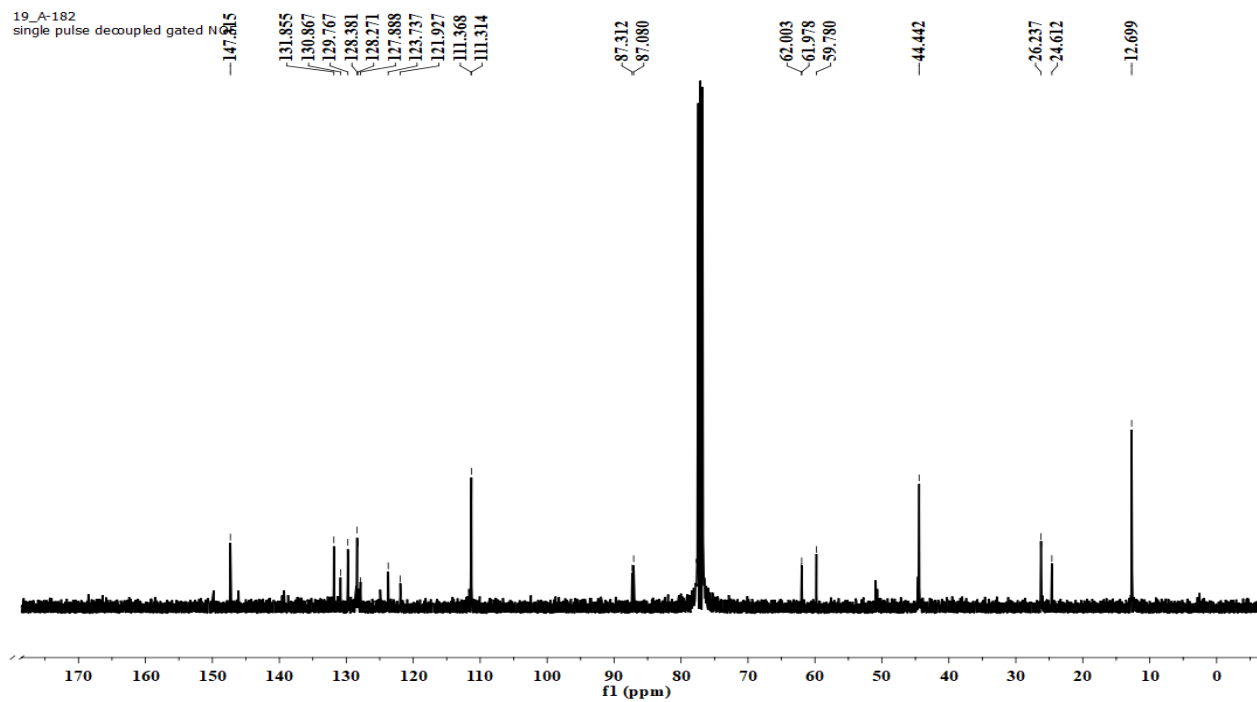

Figure S61: <sup>13</sup>C NMR spectrum of 7ae taking CDCl<sub>3</sub> as solvent.

19\_A-181  
single\_pulse

7.745  
7.723  
7.486  
7.481  
7.458  
7.436  
7.309  
7.304  
7.297  
7.291  
6.728  
6.707  
6.686

2.942  
2.565  
2.551  
2.539  
1.598  
1.583  
1.569  
1.555  
1.434  
1.420  
1.406

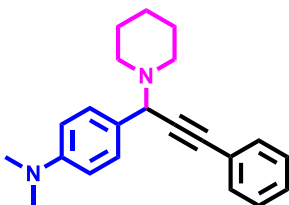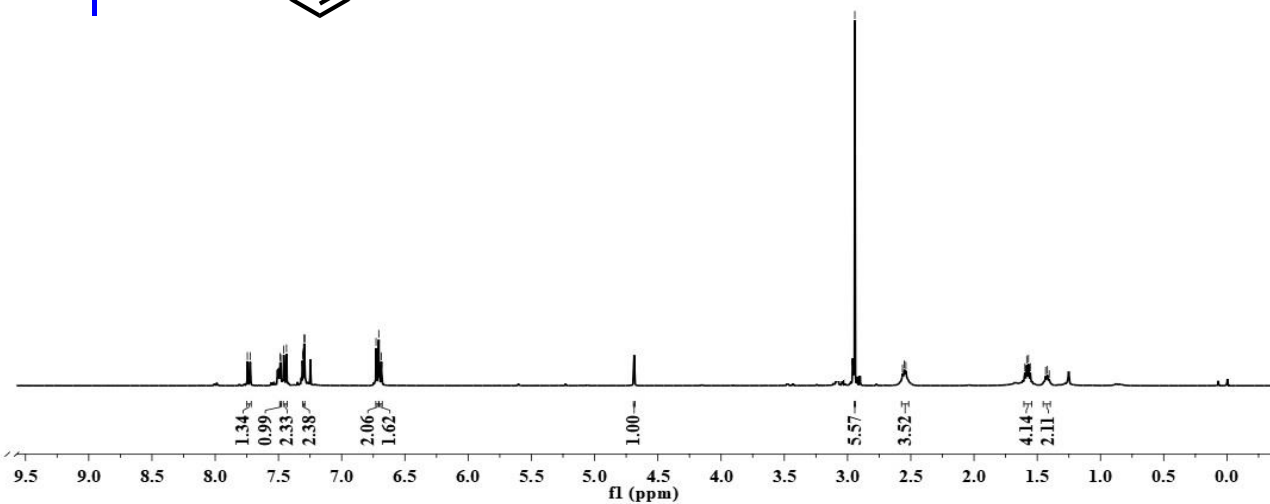

Figure S62: <sup>1</sup>H NMR spectrum of 7af taking CDCl<sub>3</sub> as solvent.

22\_A-181  
single\_pulse decoupled gated NOE

190.415

150.116

131.862

129.500

128.294

127.933

126.348

125.286

123.696

112.159

111.086

87.226

87.158

61.973

40.736

40.162

26.283

24.622

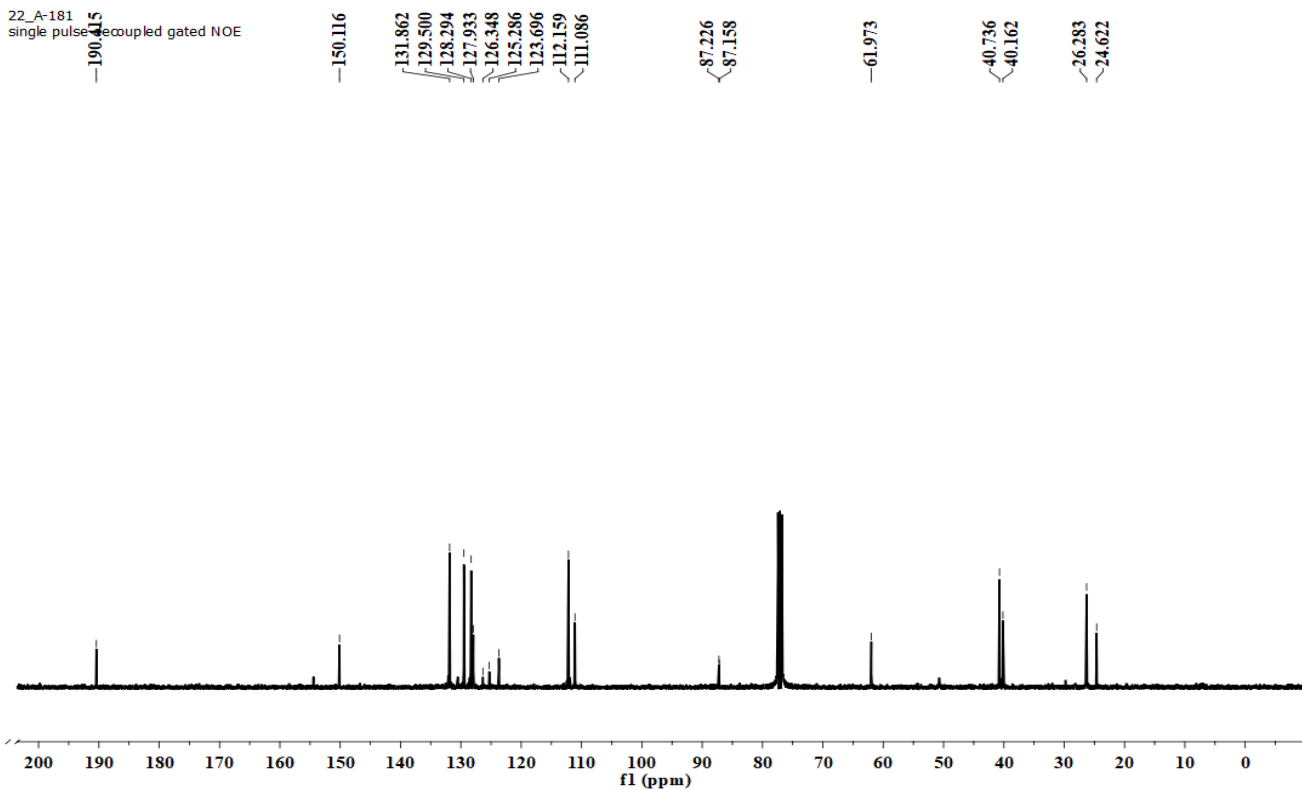

Figure S63: <sup>13</sup>C NMR spectrum of 7af taking CDCl<sub>3</sub> as solvent.

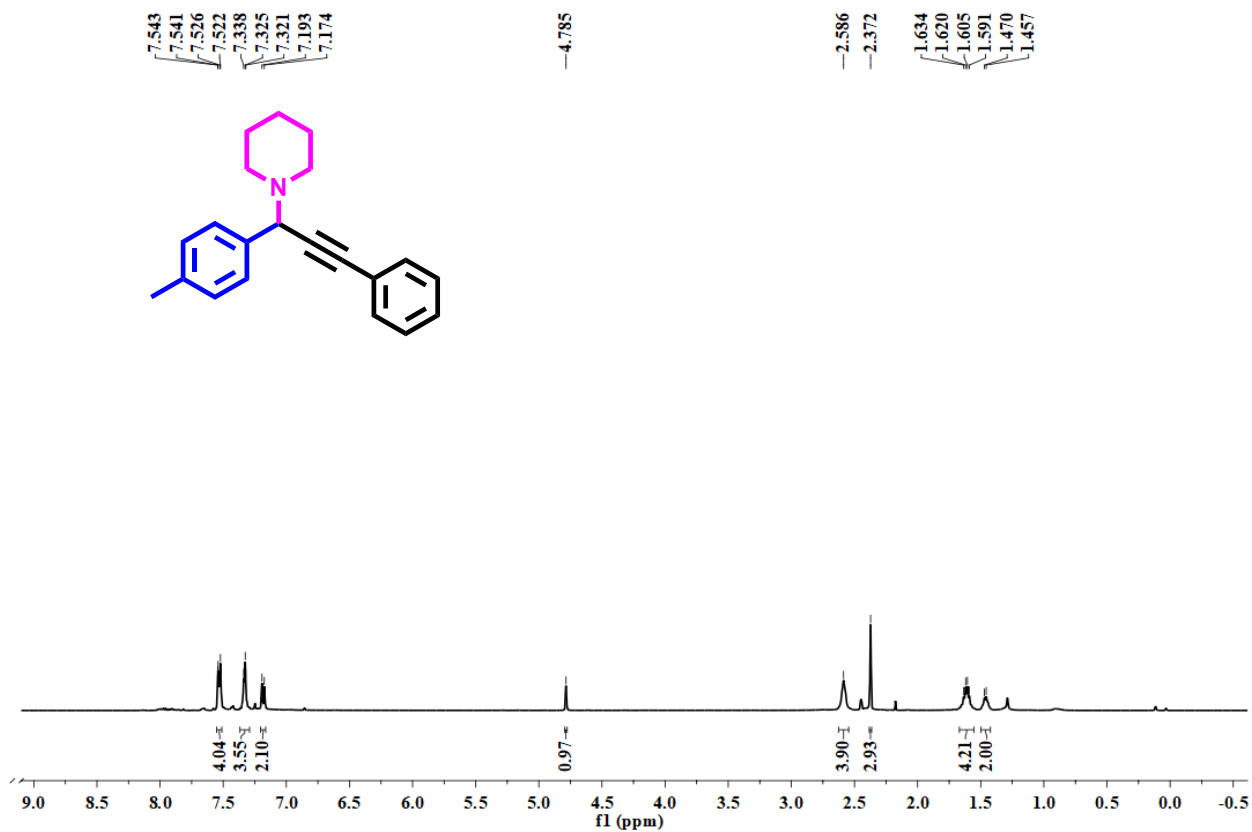

Figure S64: <sup>1</sup>H NMR spectrum of 7ag taking CDCl<sub>3</sub> as solvent.

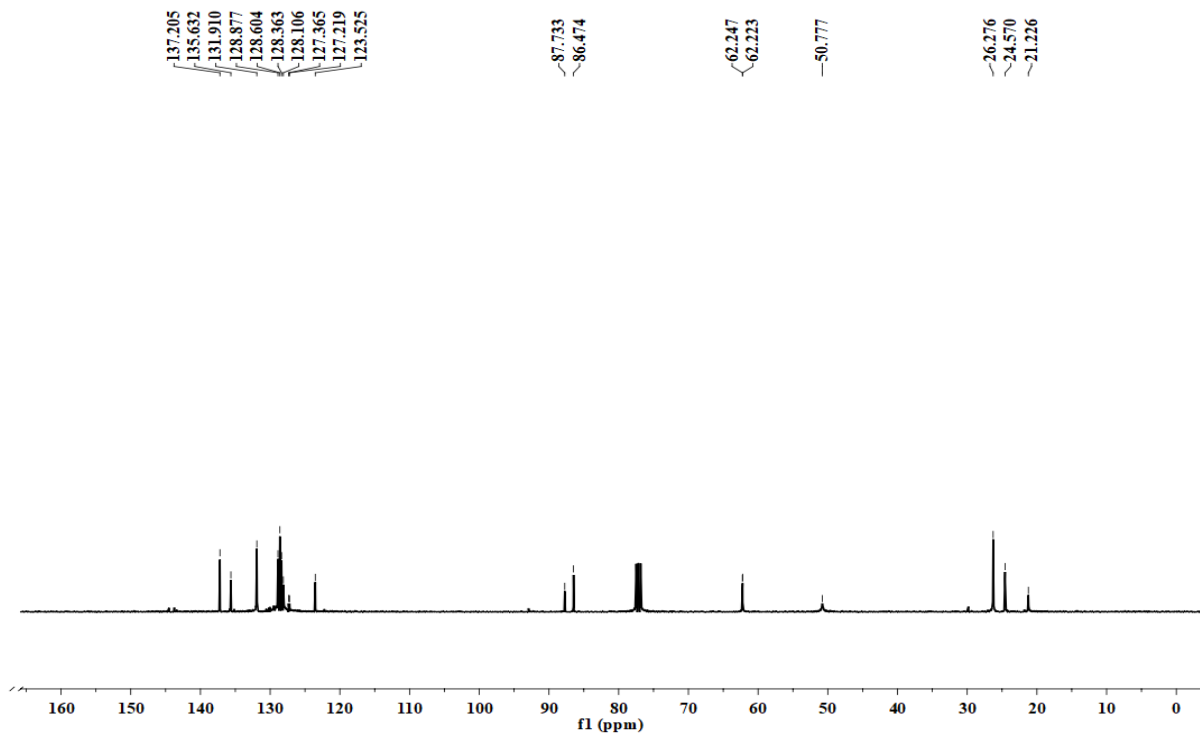

Figure S65: <sup>13</sup>C NMR spectrum of 7ag taking CDCl<sub>3</sub> as solvent.



28\_A-198  
single\_pulse

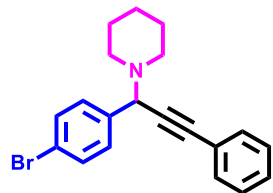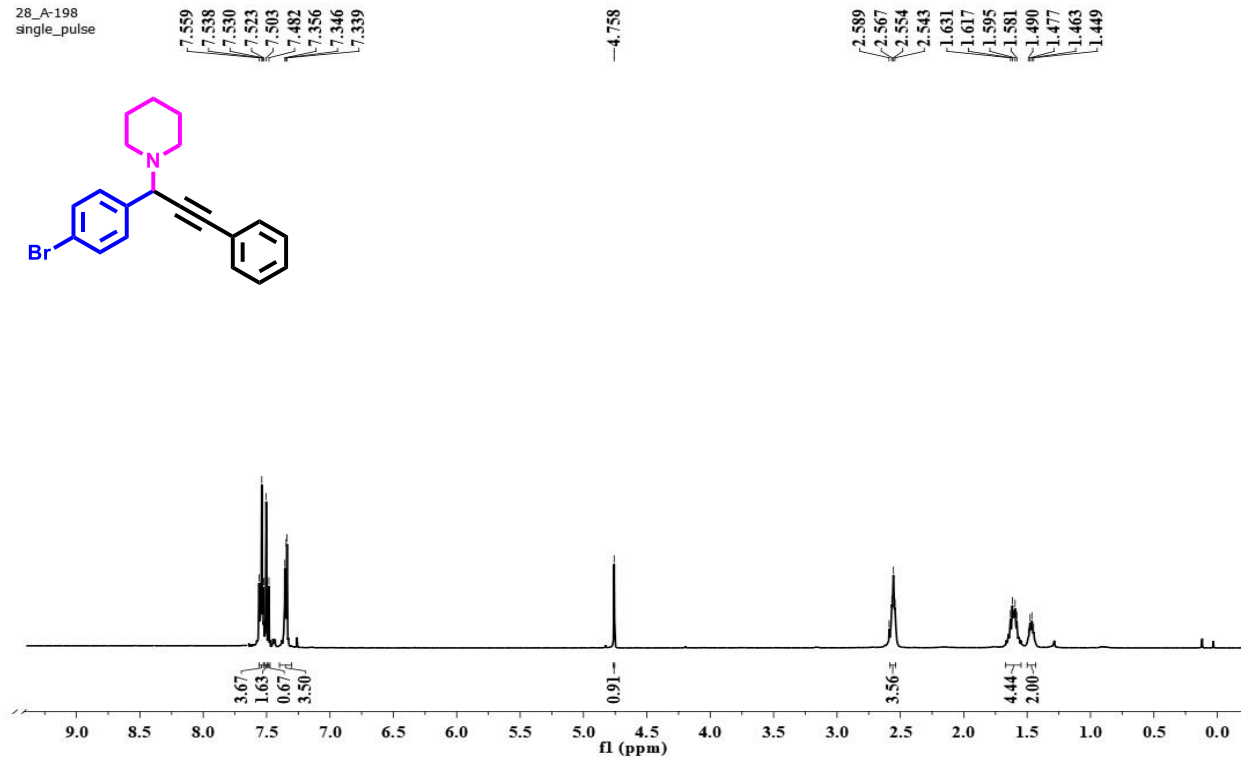

Figure S66:  $^1\text{H}$  NMR spectrum of 7ah taking  $\text{CDCl}_3$  as solvent.

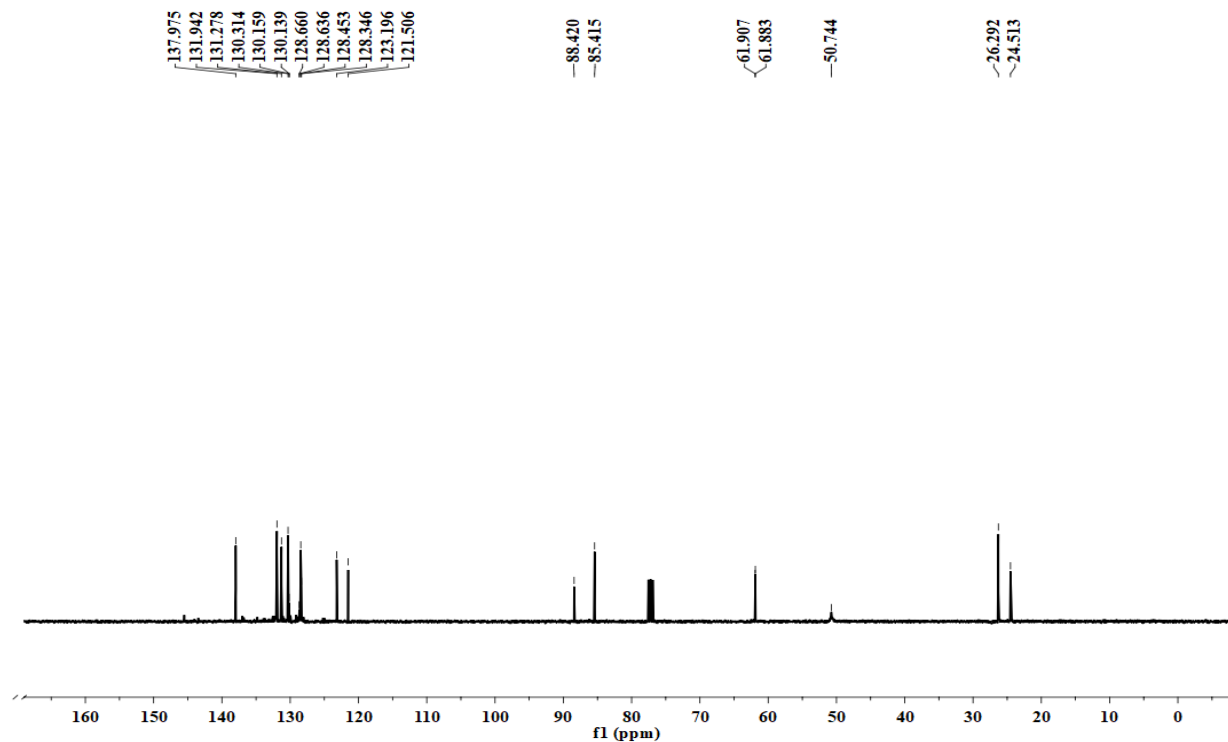

Figure S67:  $^{13}\text{C}$  NMR spectrum of 7ah taking  $\text{CDCl}_3$  as solvent

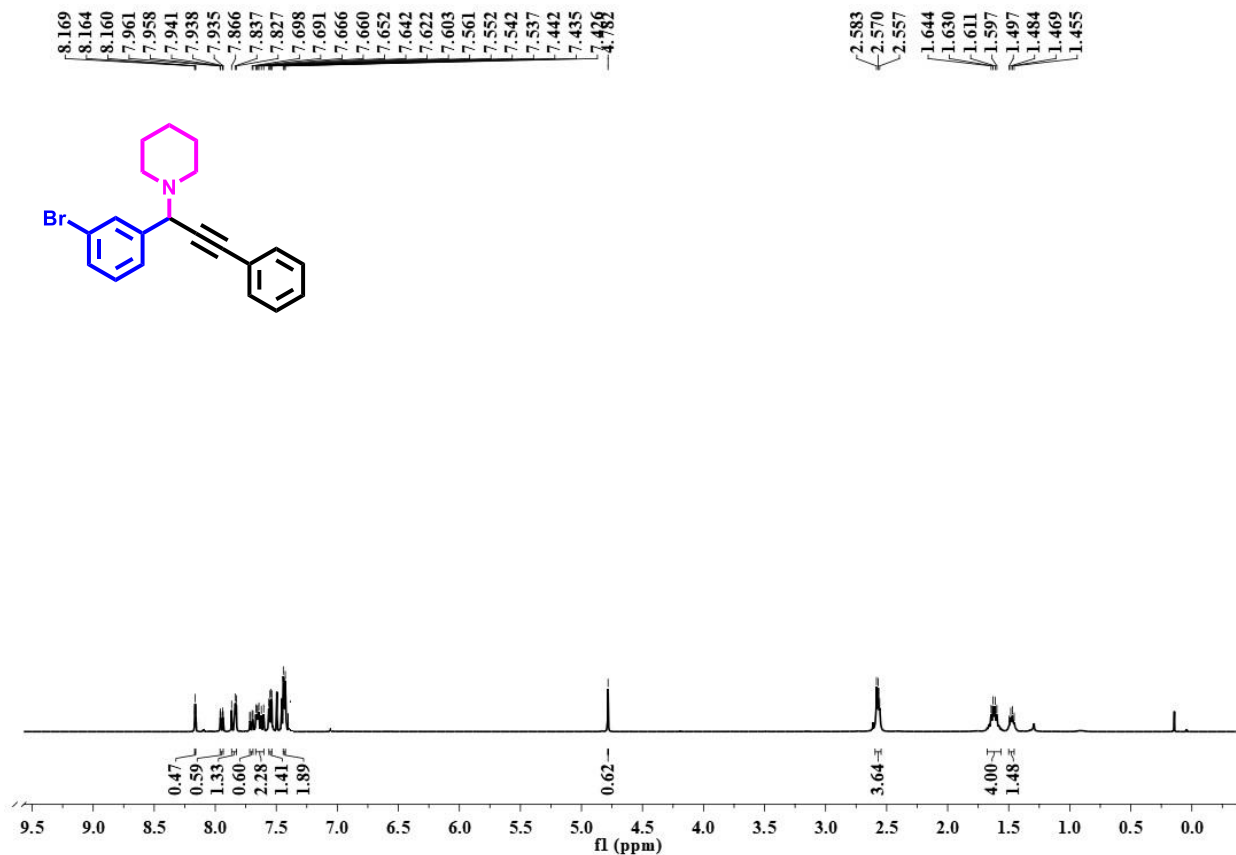

Figure S68: <sup>1</sup>H NMR spectrum of 7ai taking CDCl<sub>3</sub> as solvent.

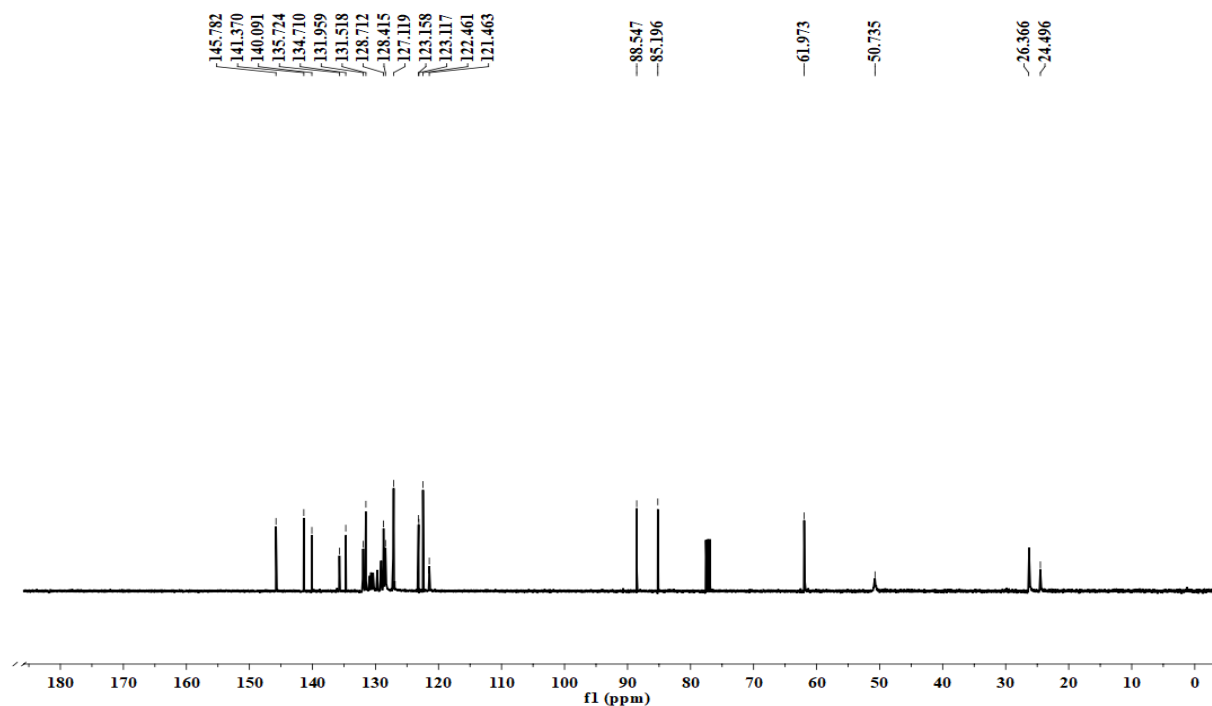

Figure S69: <sup>13</sup>C NMR spectrum of 7ai taking CDCl<sub>3</sub> as solvent

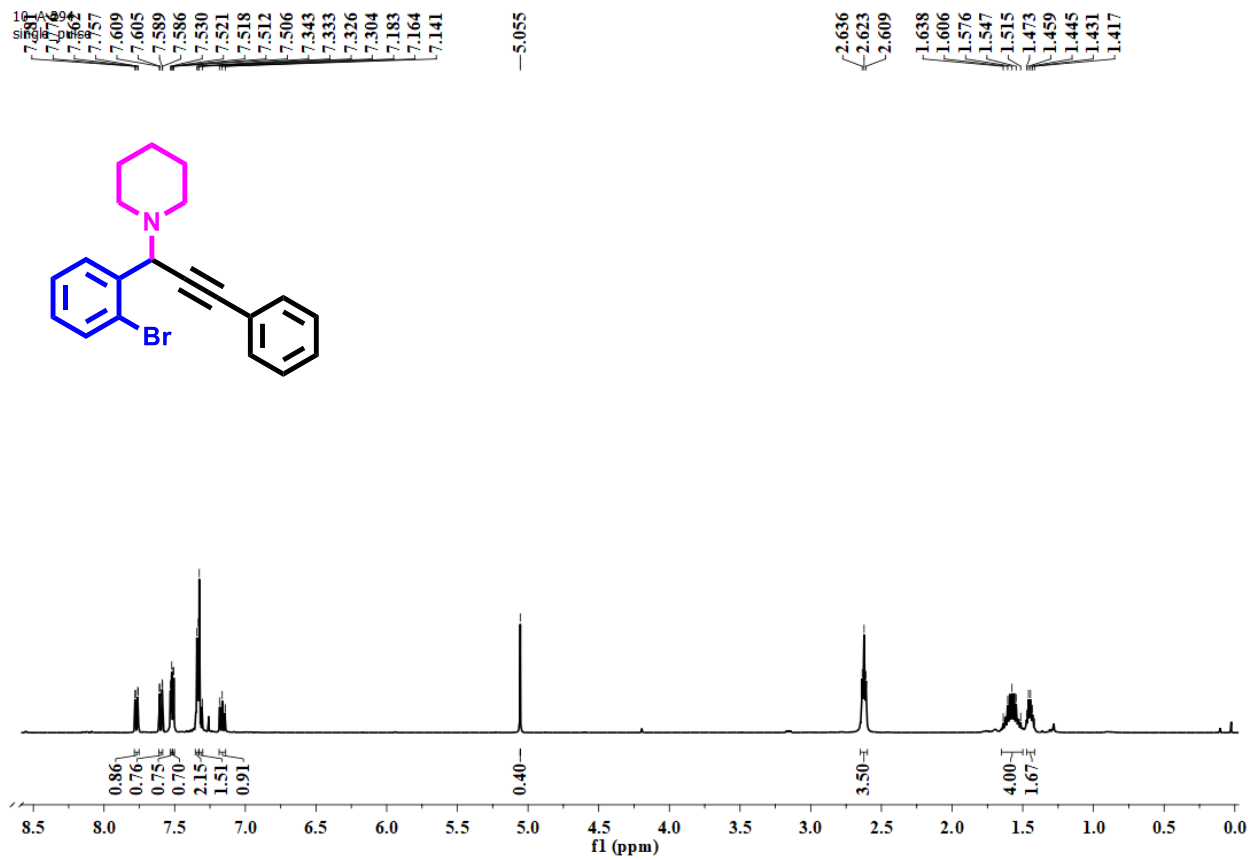

Figure S70: <sup>1</sup>H NMR spectrum of 7aj taking CDCl<sub>3</sub> as solvent.

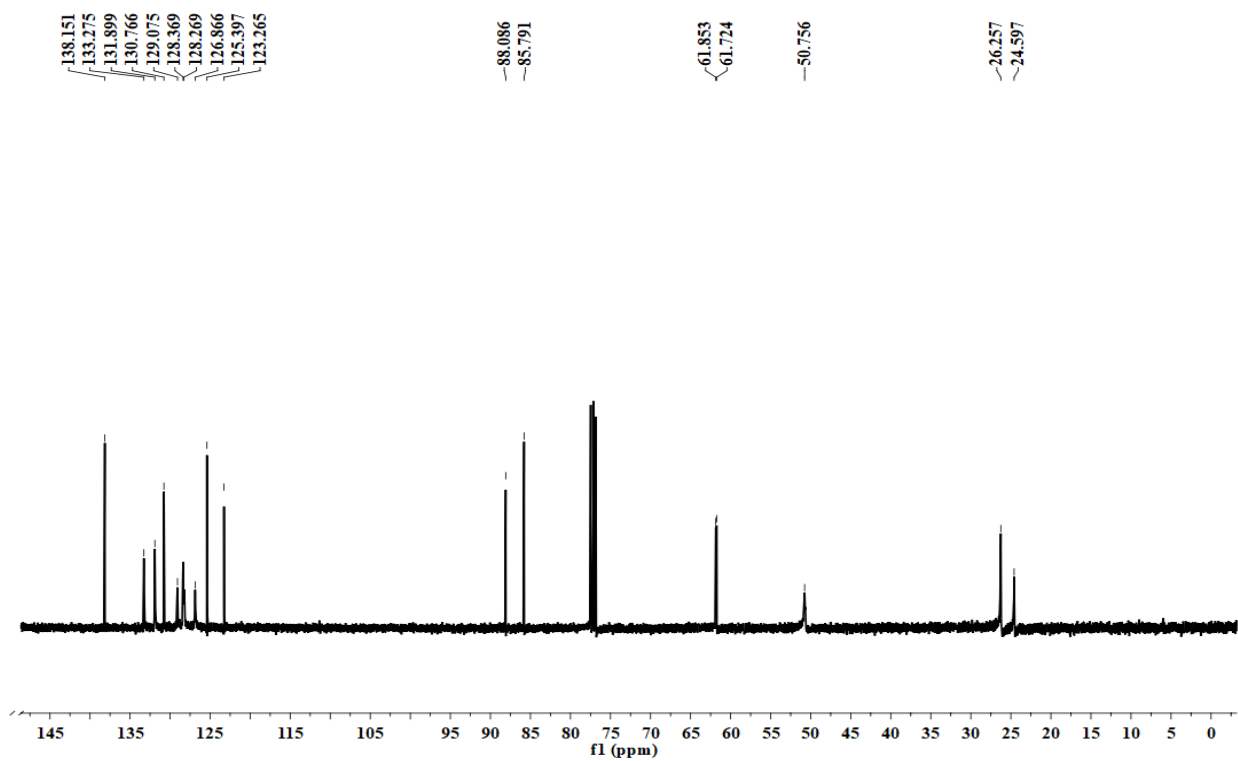

Figure S71: <sup>13</sup>C NMR spectrum of 7aj taking CDCl<sub>3</sub> as solvent

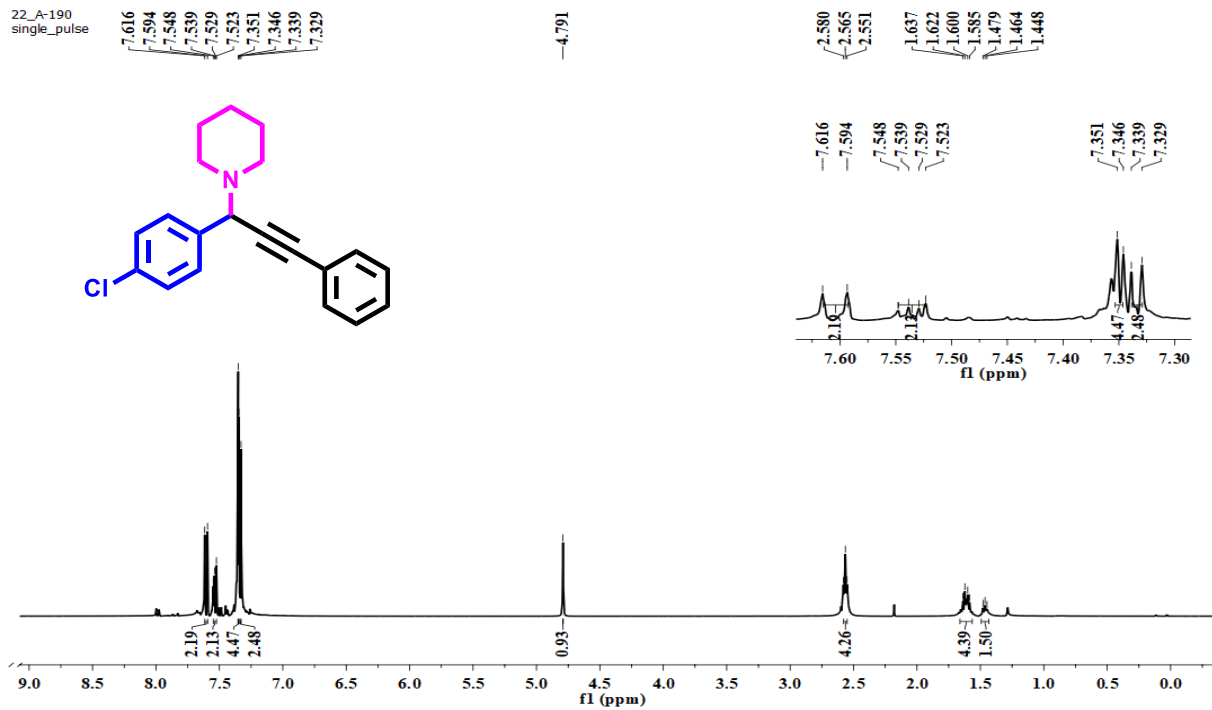

Figure S72:  $^1\text{H}$  NMR spectrum of 7ak taking  $\text{CDCl}_3$  as solvent.

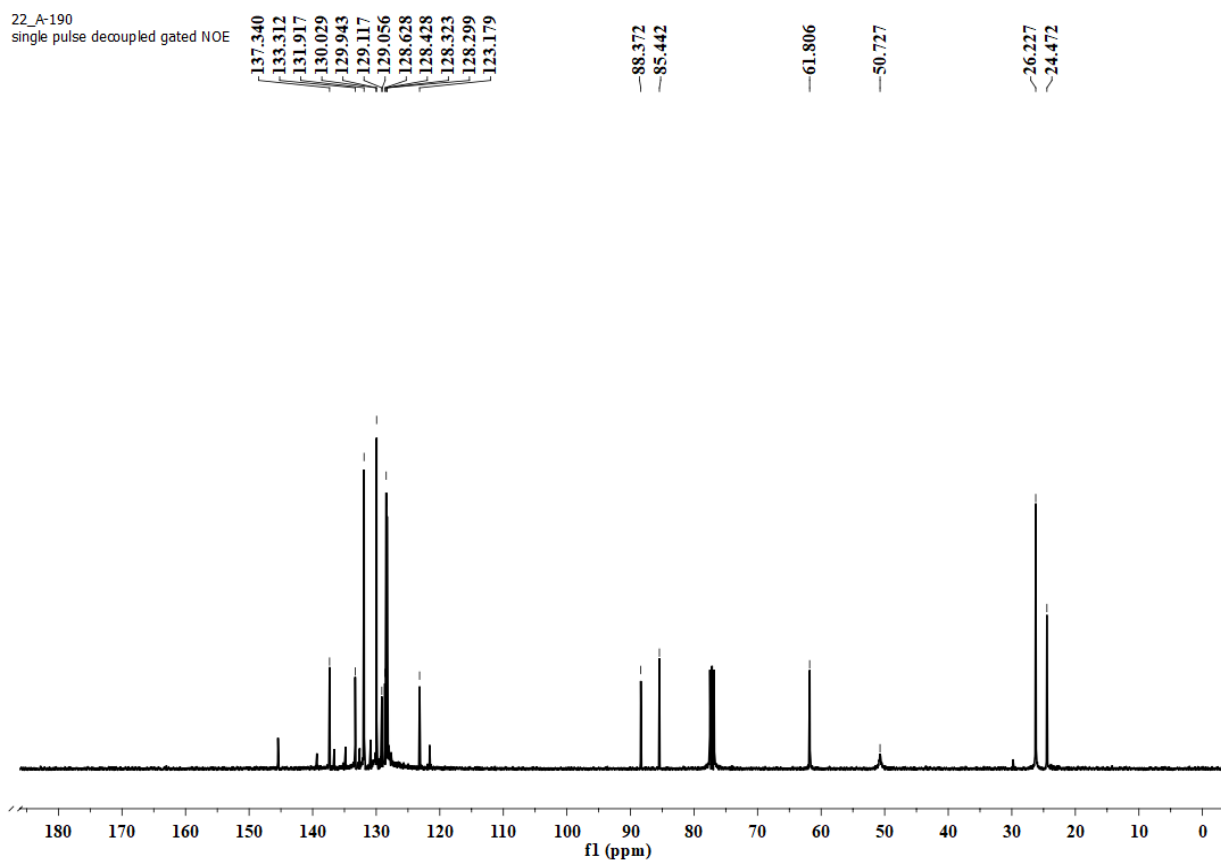

Figure S73:  $^{13}\text{C}$  NMR spectrum of 7ak taking  $\text{CDCl}_3$  as solvent

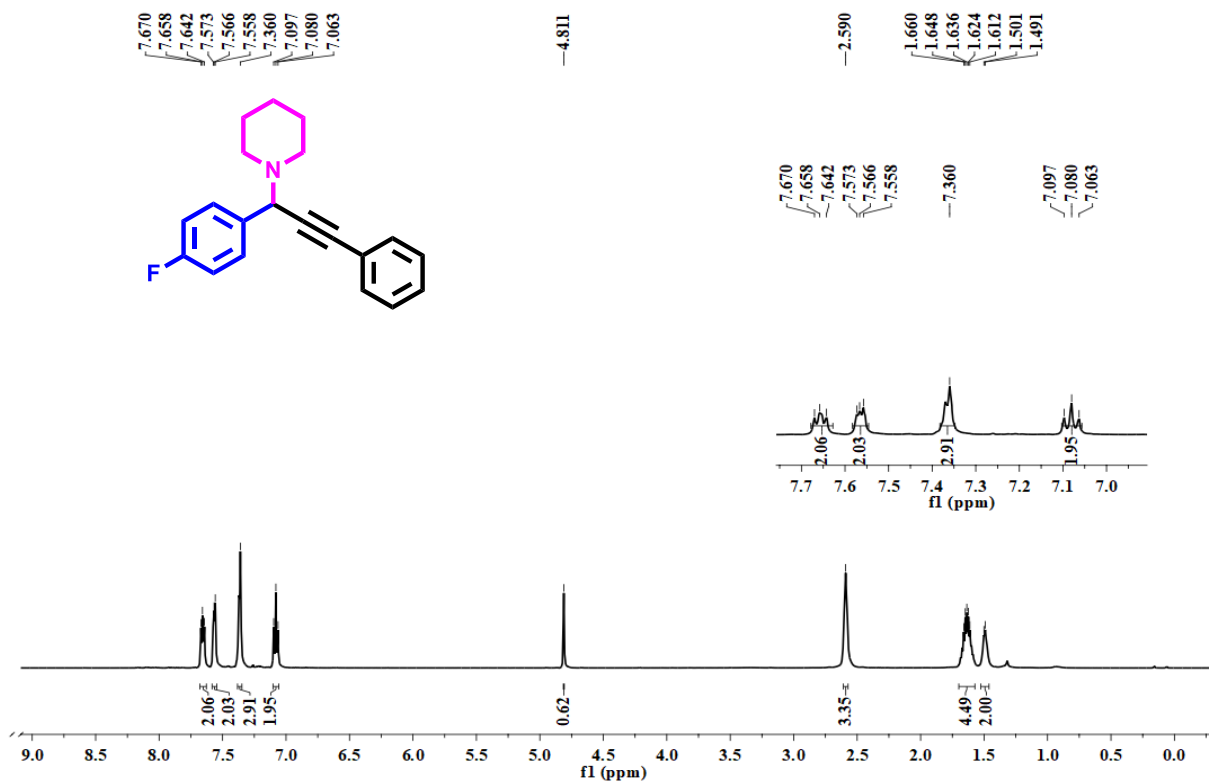

Figure S74: <sup>1</sup>H NMR spectrum of 7al taking CDCl<sub>3</sub> as solvent.

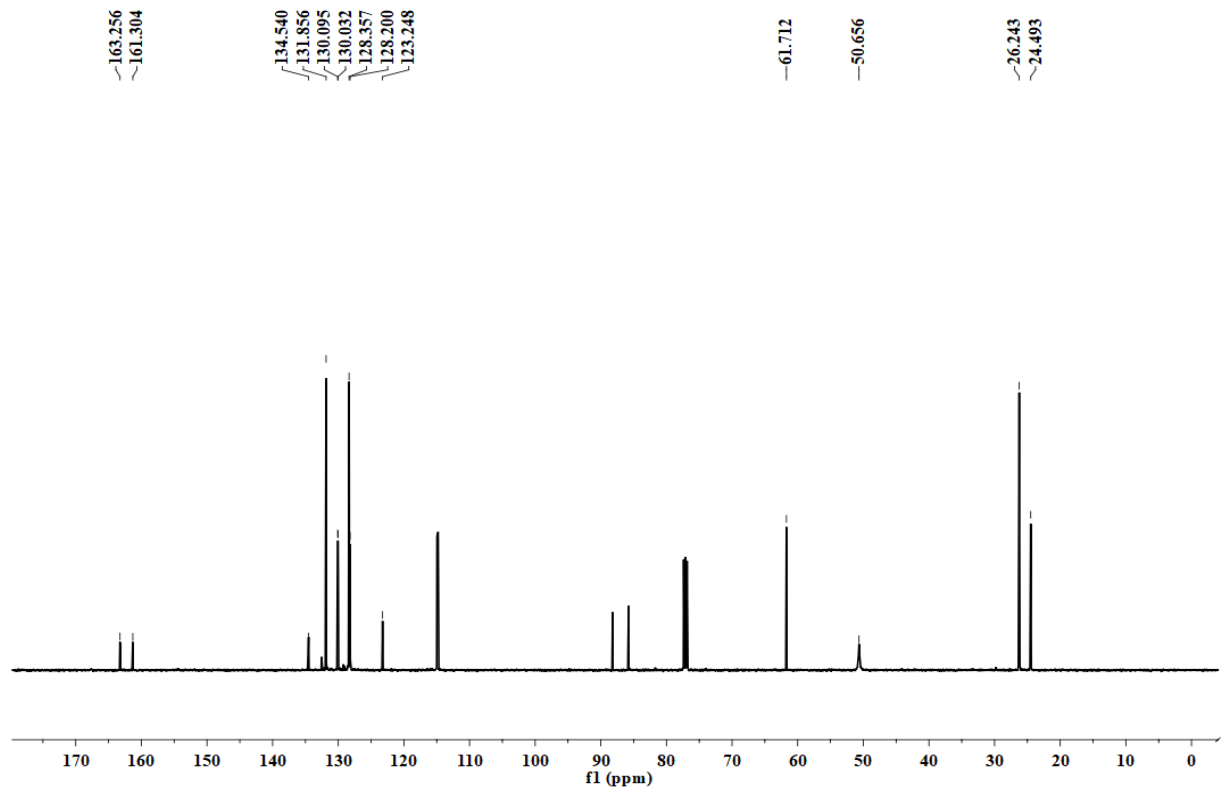

Figure S75: <sup>13</sup>C NMR spectrum of 7al taking CDCl<sub>3</sub> as solvent

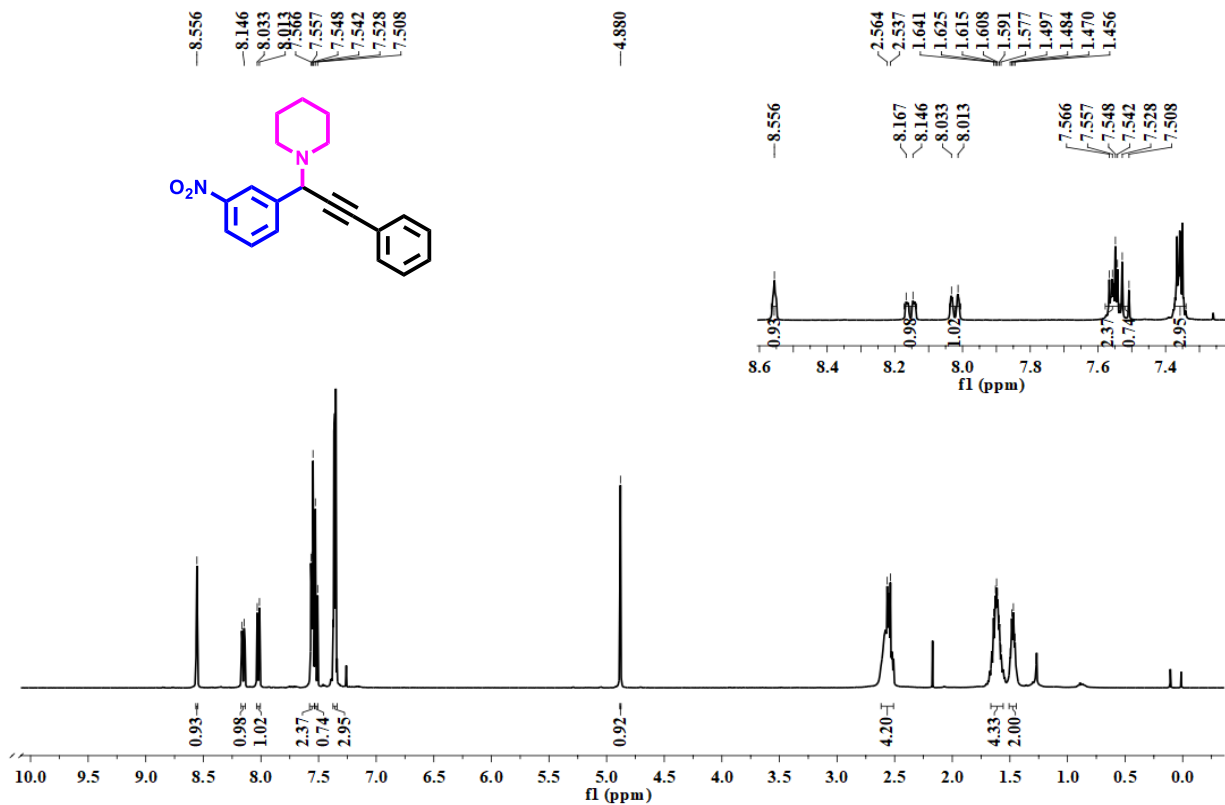

Figure S76: <sup>1</sup>H NMR spectrum of 7am taking CDCl<sub>3</sub> as solvent.

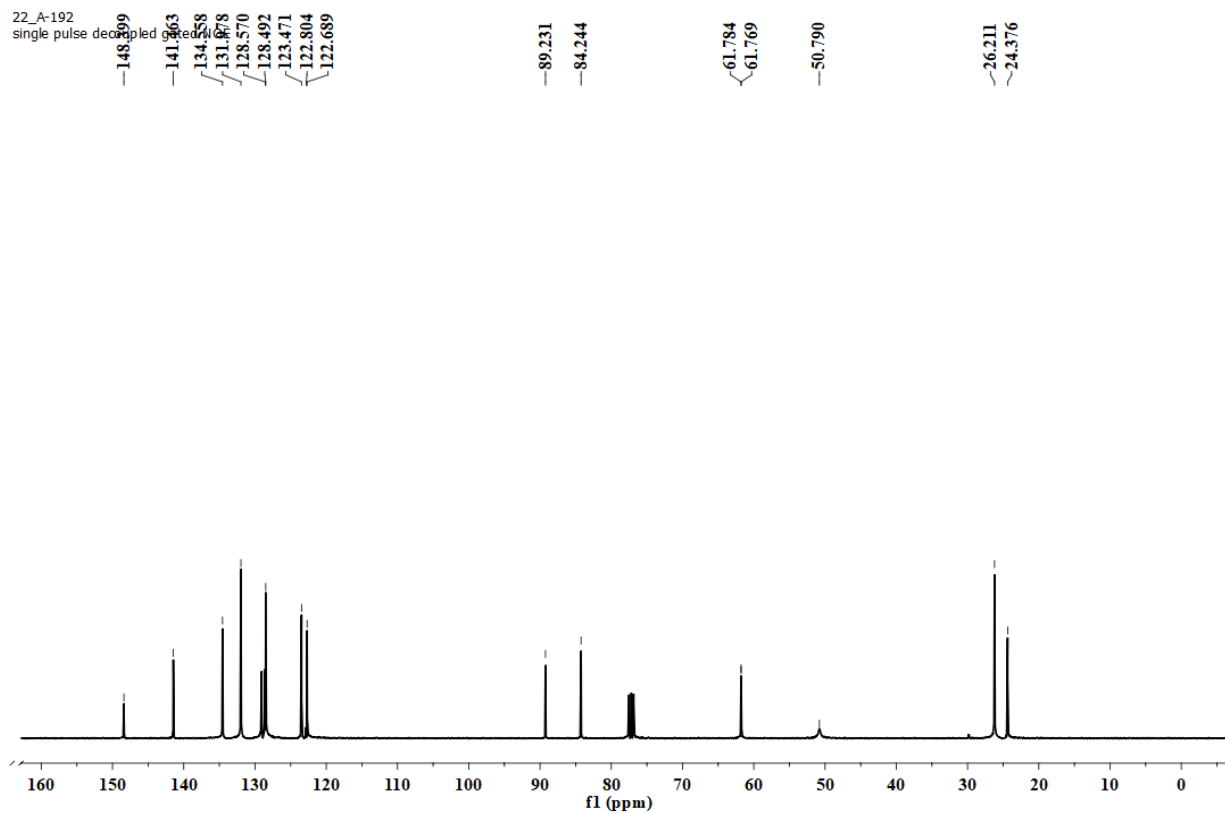

Figure S77: <sup>13</sup>C NMR spectrum of 7am taking CDCl<sub>3</sub> as solvent

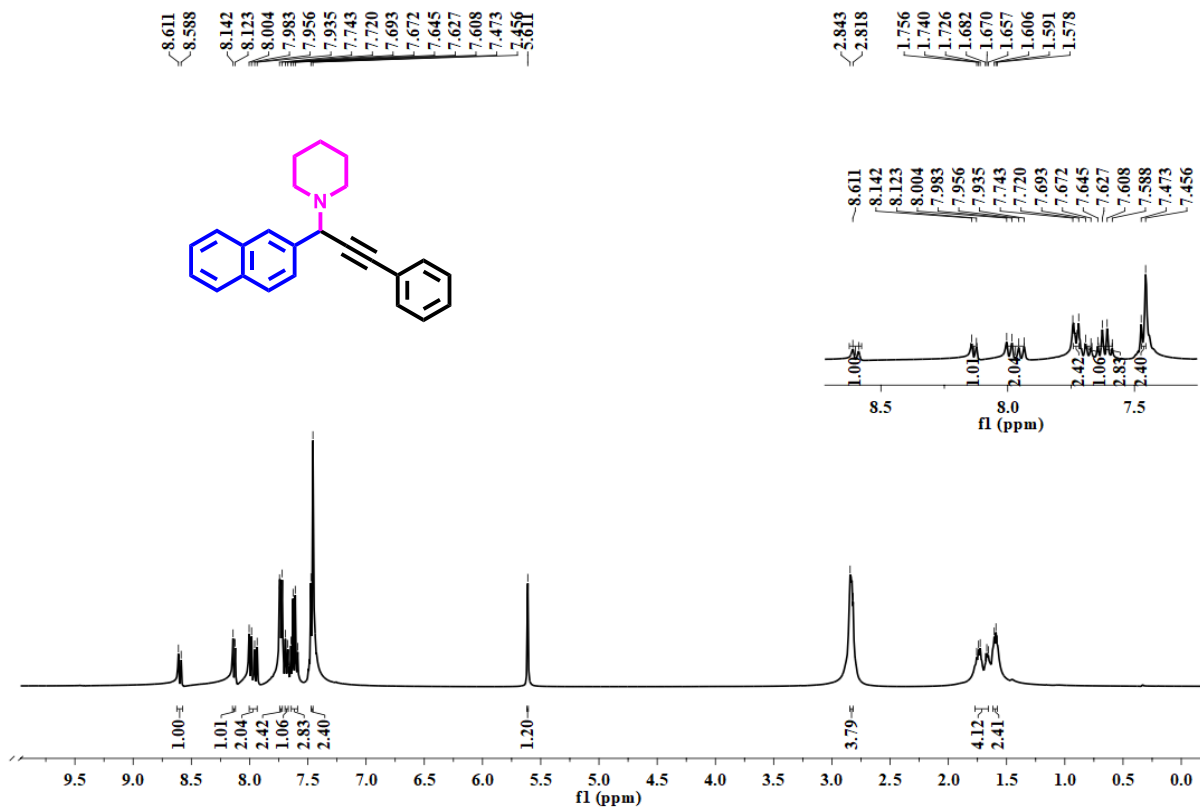

Figure S78: <sup>1</sup>H NMR spectrum of 7an taking CDCl<sub>3</sub> as solvent.

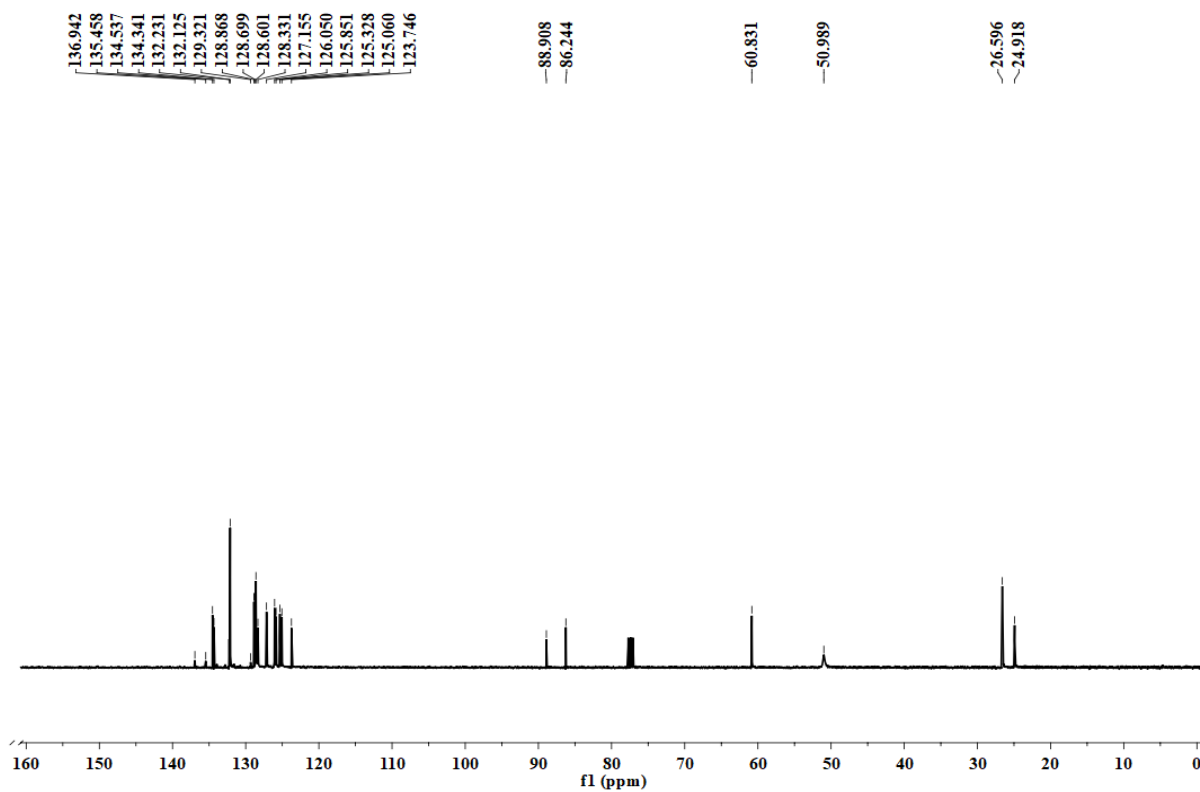

Figure S79: <sup>13</sup>C NMR spectrum of 7an taking CDCl<sub>3</sub> as solvent.

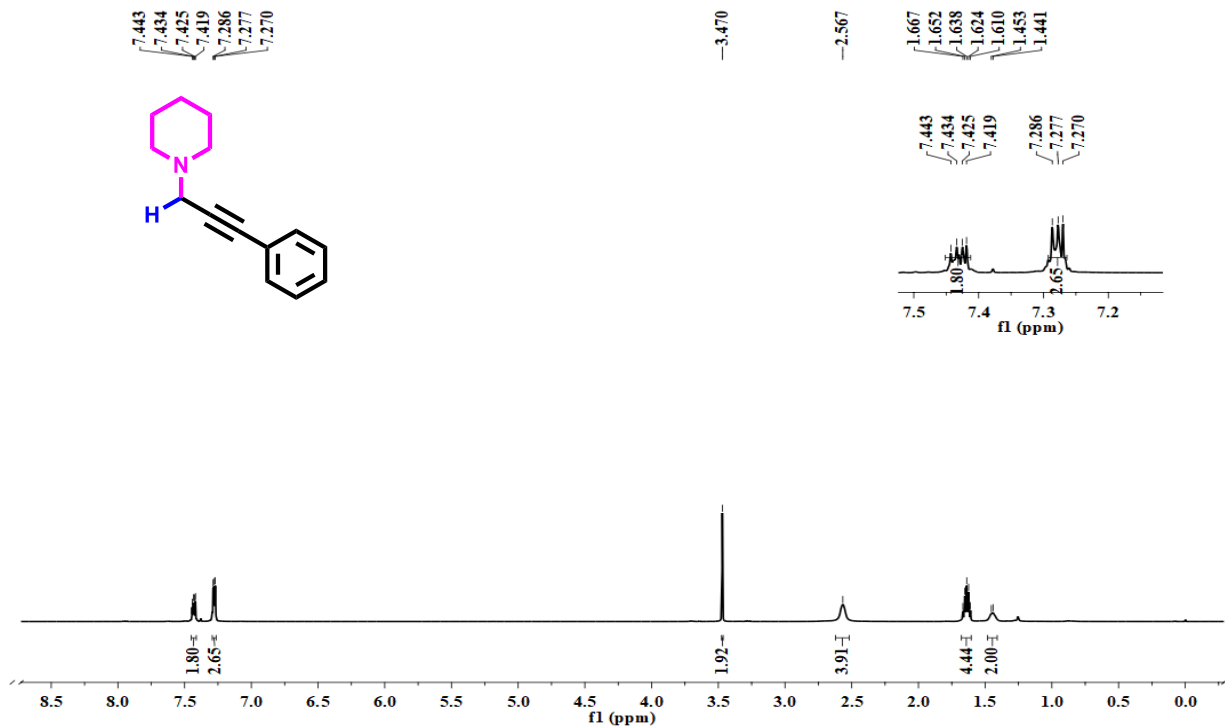

Figure S80: <sup>1</sup>H NMR spectrum of 7ao taking CDCl<sub>3</sub> as solvent.

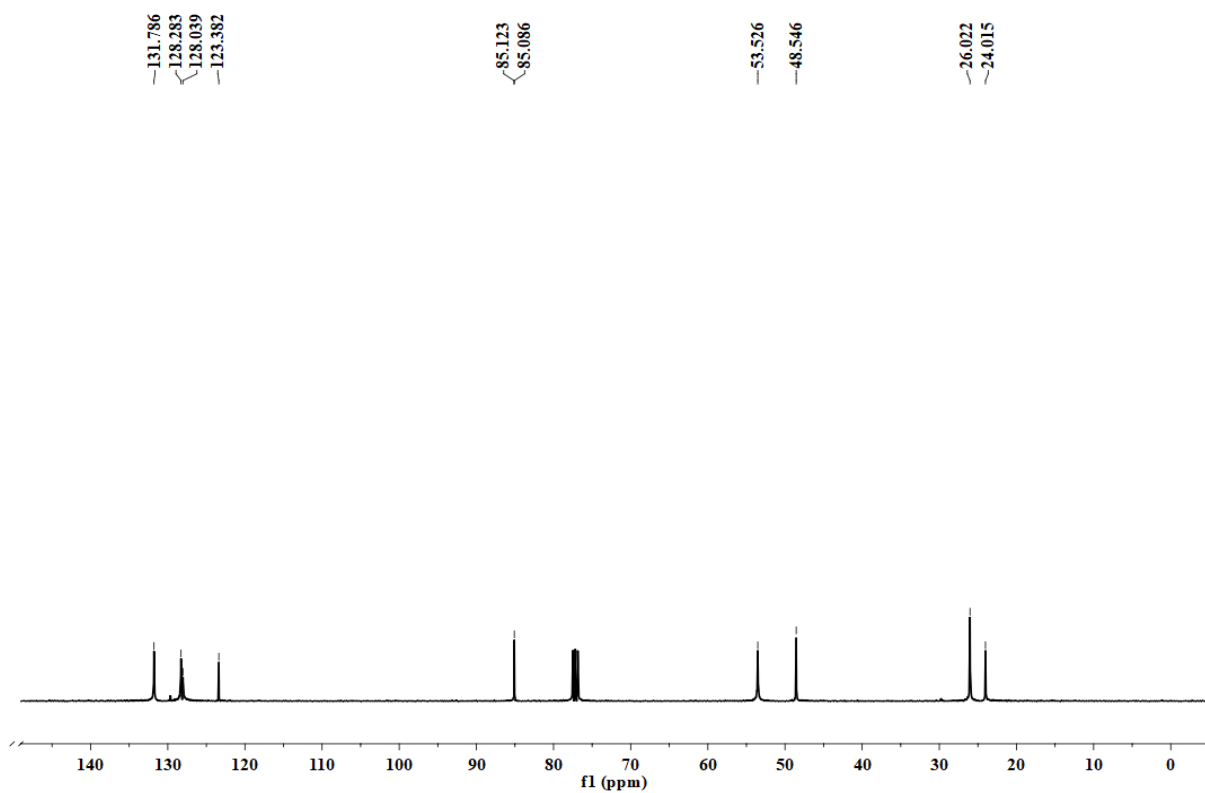

Figure S81: <sup>13</sup>C NMR spectrum of 7ao taking CDCl<sub>3</sub> as solvent.



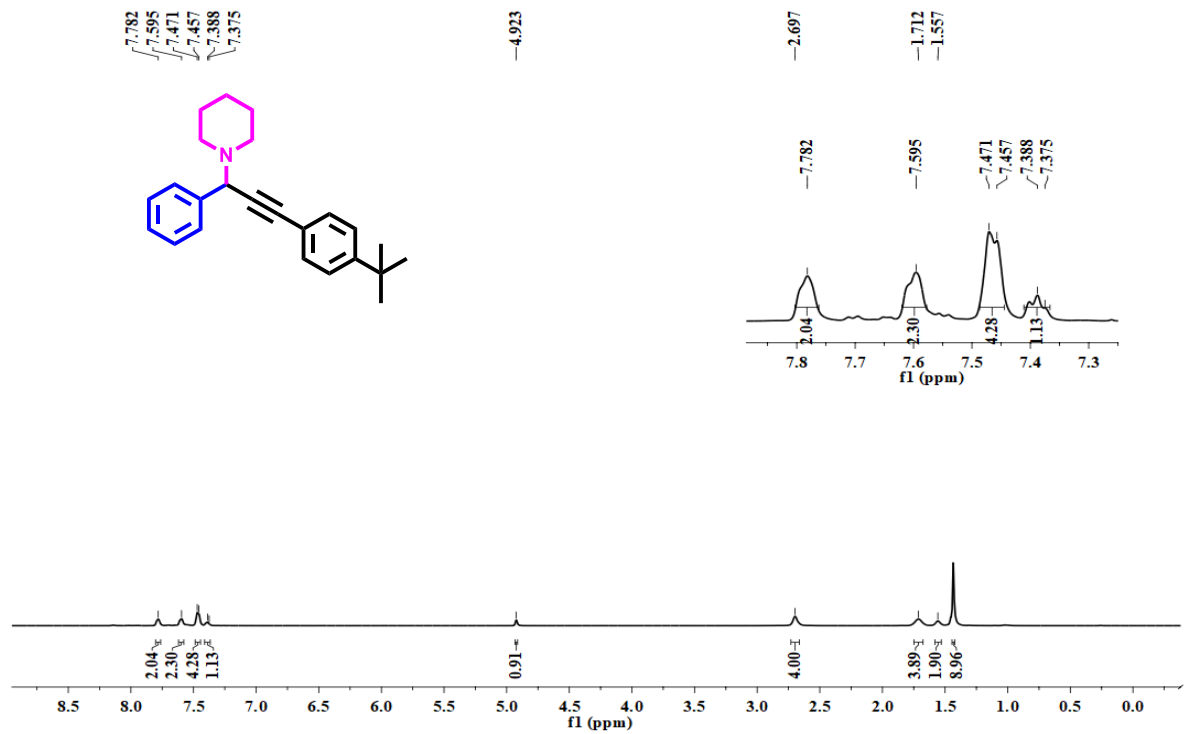

Figure S82: <sup>1</sup>H NMR spectrum of 8aa taking CDCl<sub>3</sub> as solvent.

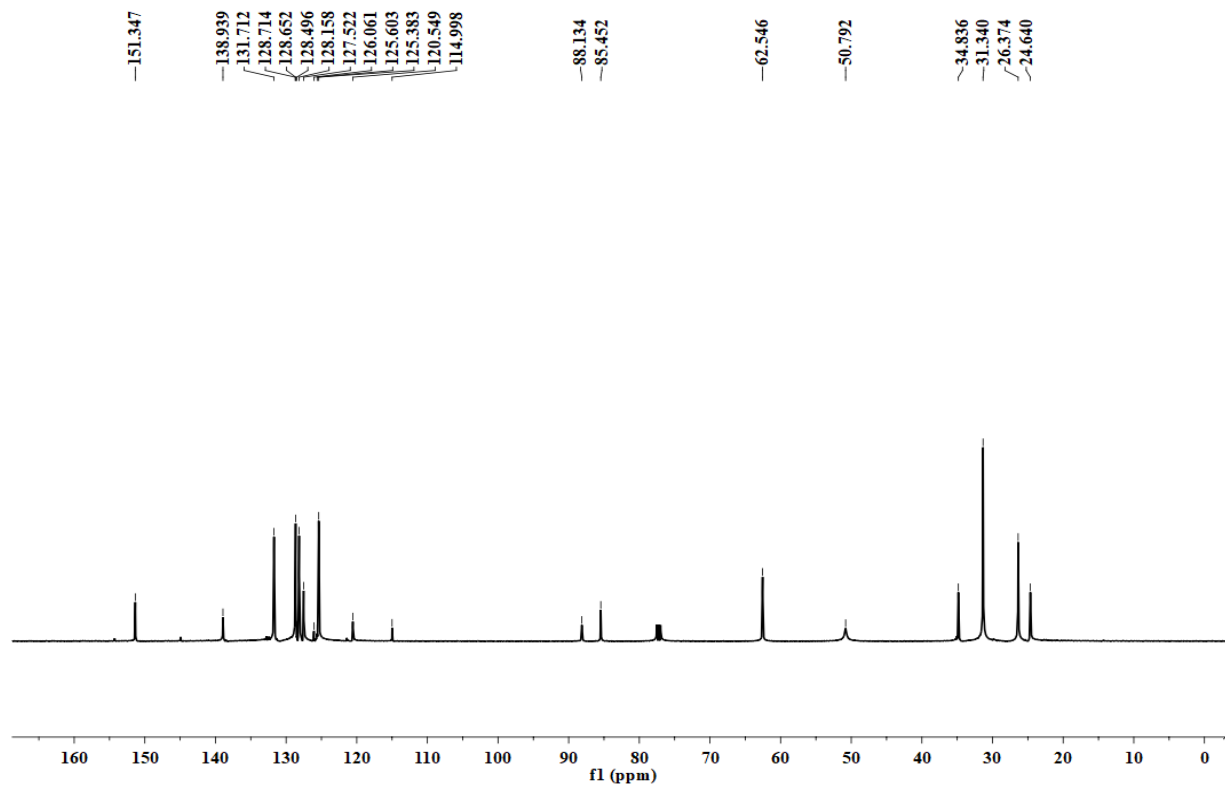

Figure S83: <sup>13</sup>C NMR spectrum of 8aa taking CDCl<sub>3</sub> as solvent.

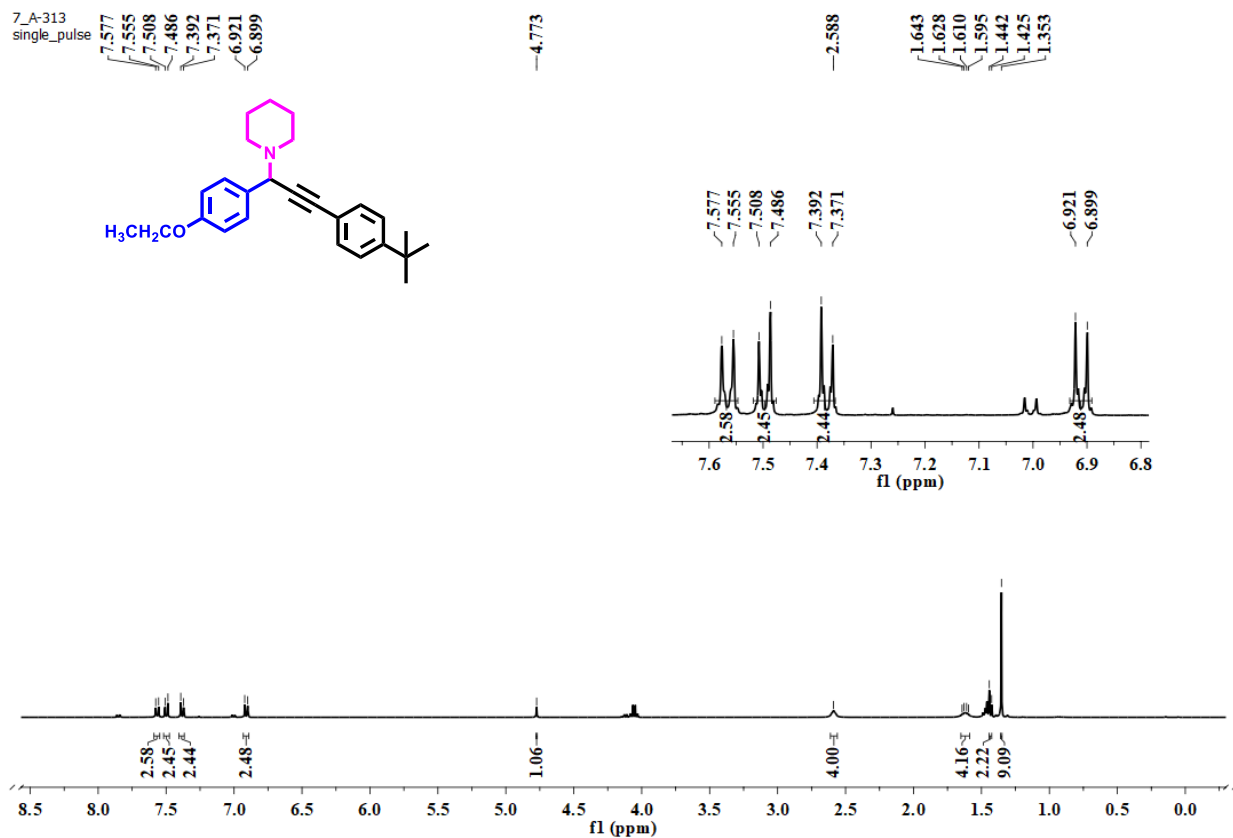

Figure S84:  $^1\text{H}$  NMR spectrum of 8ab taking  $\text{CDCl}_3$  as solvent.

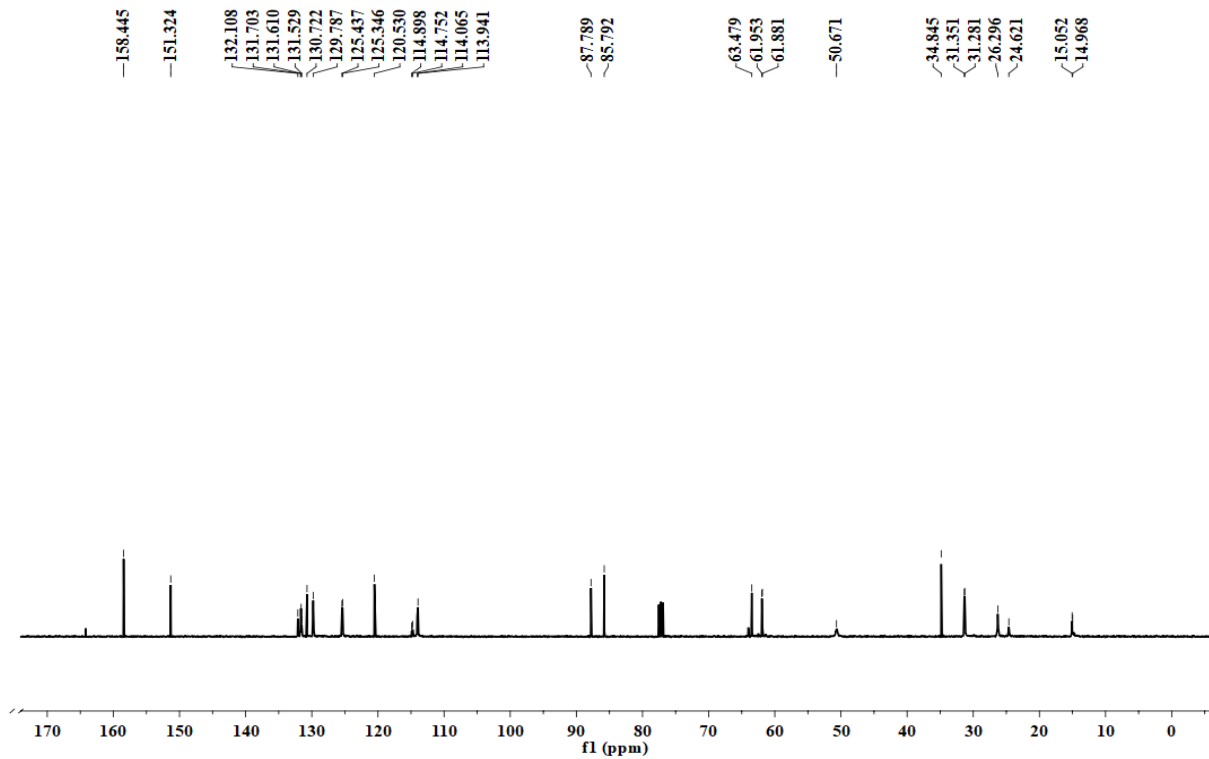

Figure S85:  $^{13}\text{C}$  NMR spectrum of 8ab taking  $\text{CDCl}_3$  as solvent.

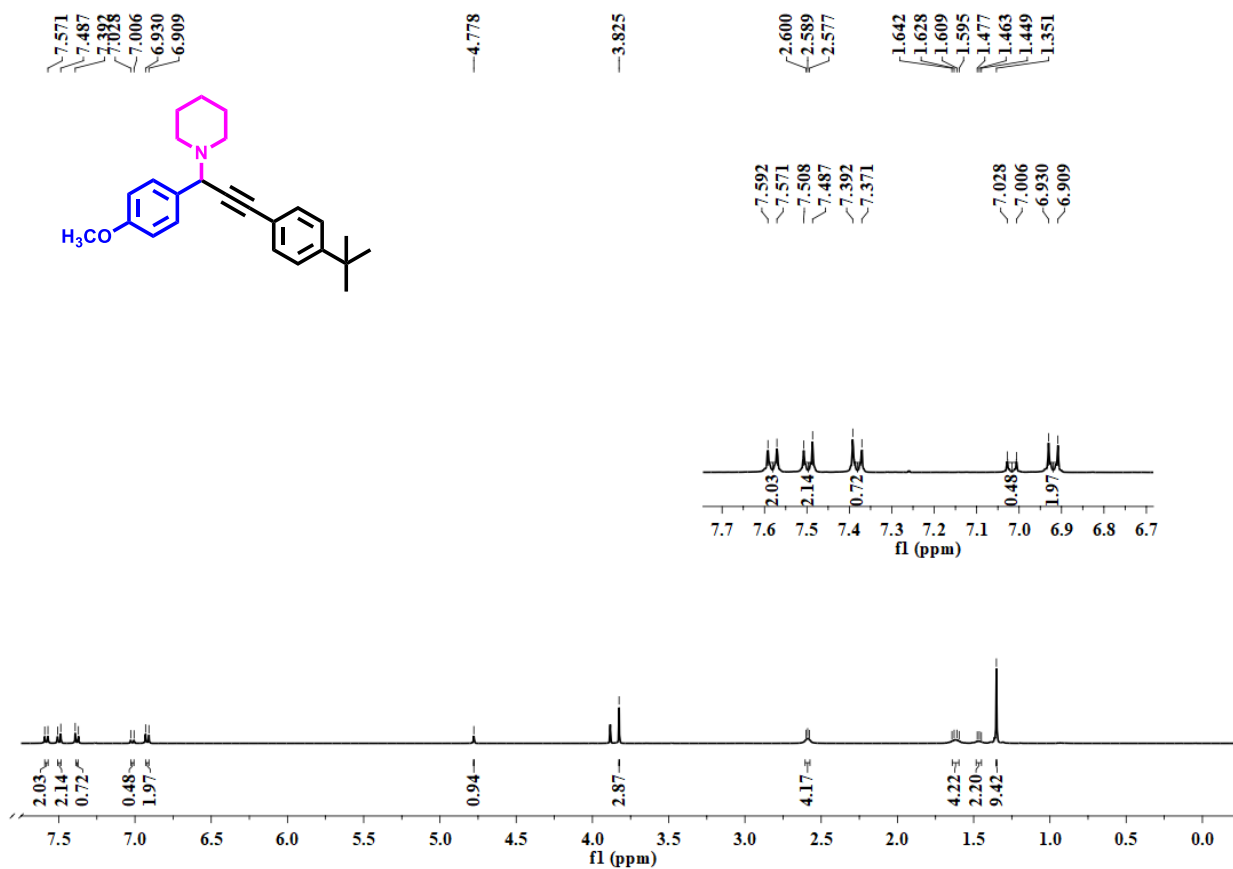

Figure S86: <sup>1</sup>H NMR spectrum of 8ac taking CDCl<sub>3</sub> as solvent.

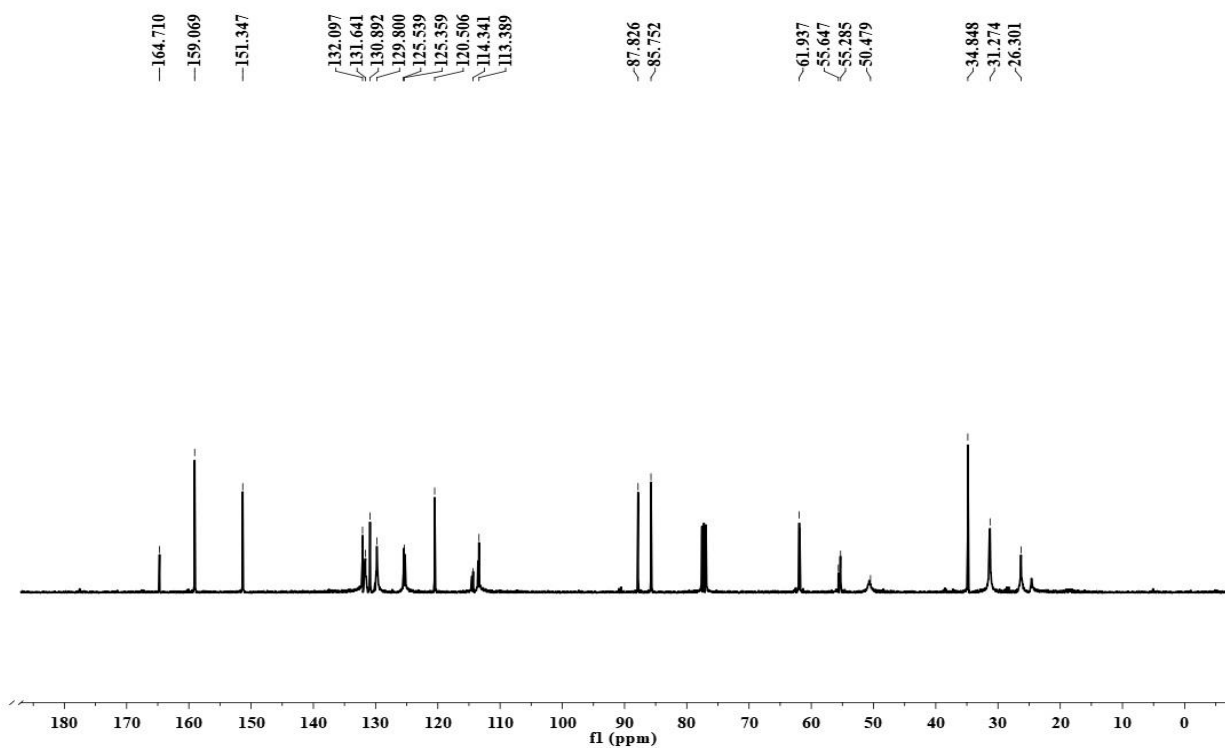

Figure S87: <sup>13</sup>C NMR spectrum of 8ac taking CDCl<sub>3</sub> as solvent.

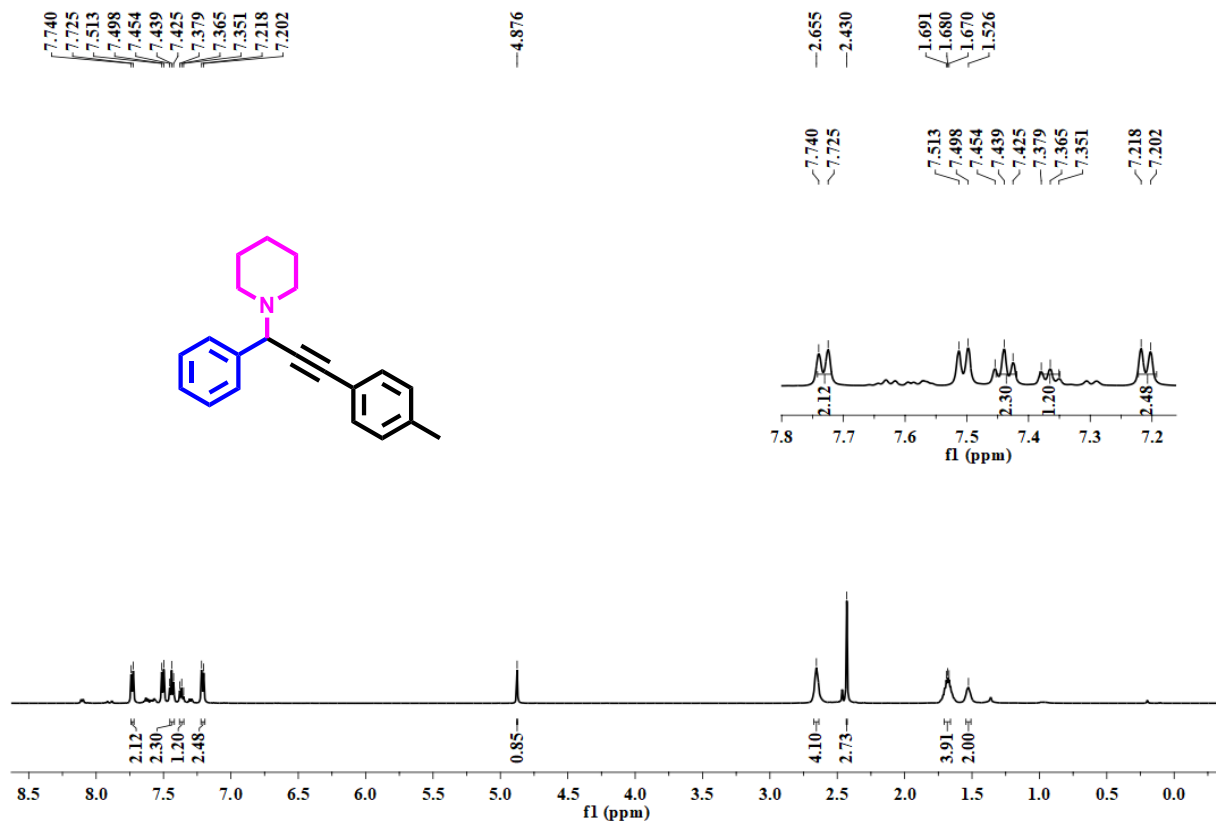

Figure S88: <sup>1</sup>H NMR spectrum of 8ad taking CDCl<sub>3</sub> as solvent.

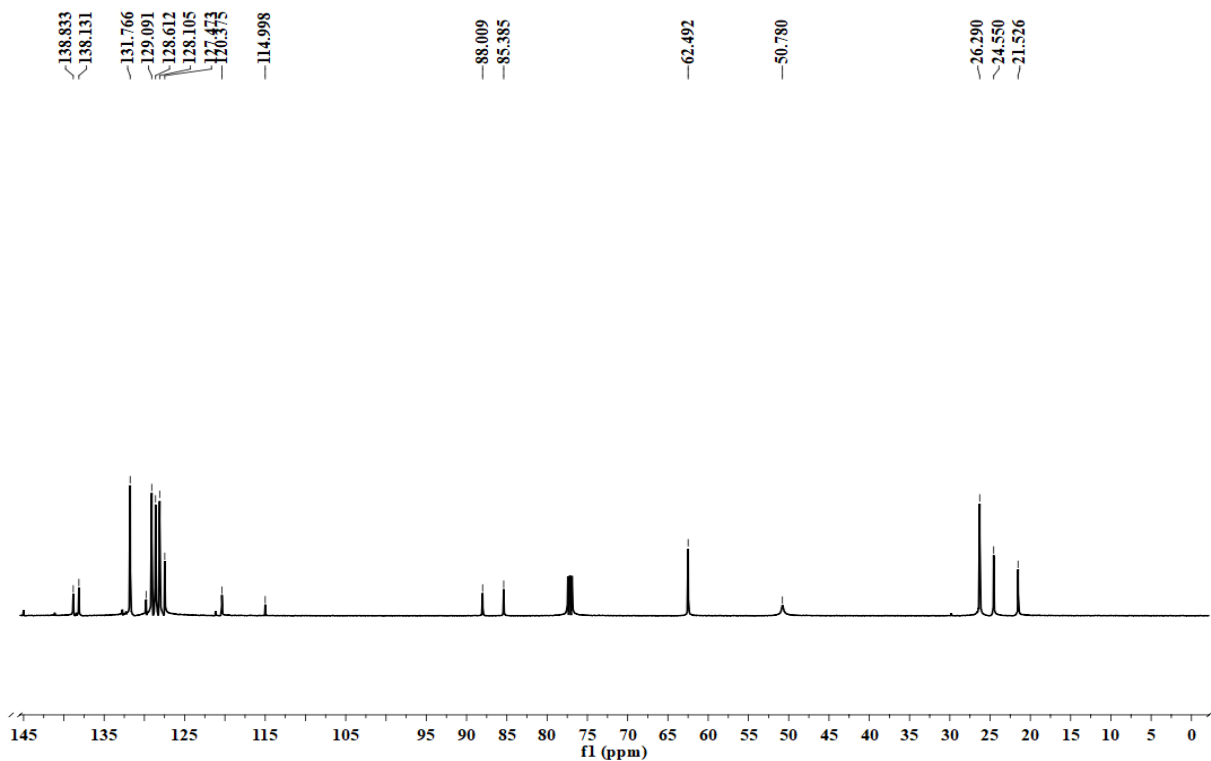

Figure S89: <sup>13</sup>C NMR spectrum of 8ad taking CDCl<sub>3</sub> as solvent.

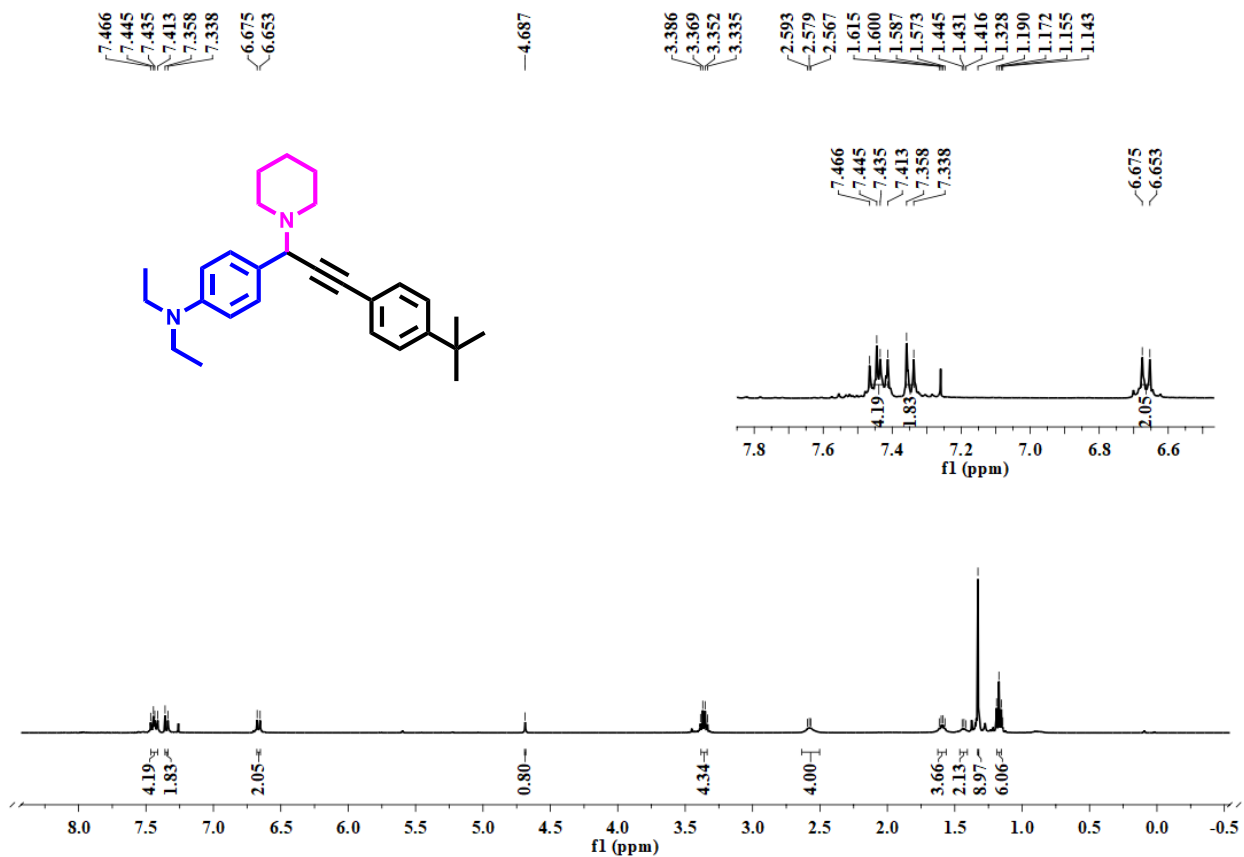

Figure S90: <sup>1</sup>H NMR spectrum of 8ae taking CDCl<sub>3</sub> as solvent.

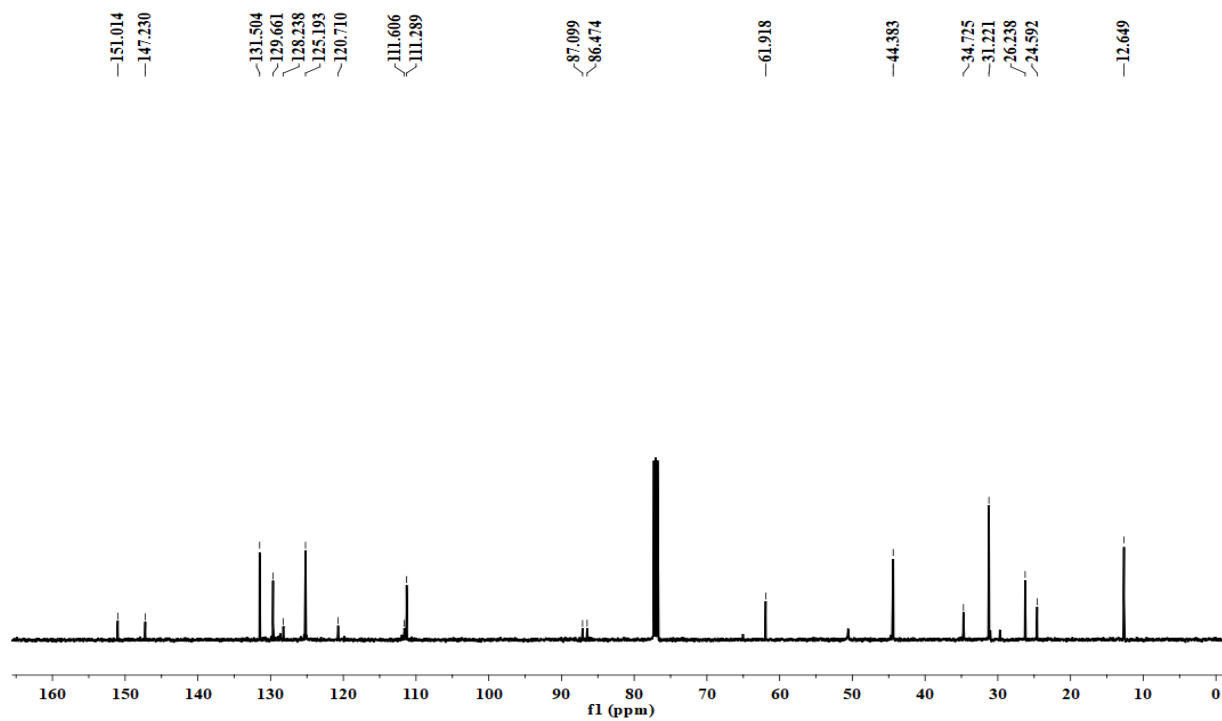

Figure S91: <sup>13</sup>C NMR spectrum of 8ae taking CDCl<sub>3</sub> as solvent.

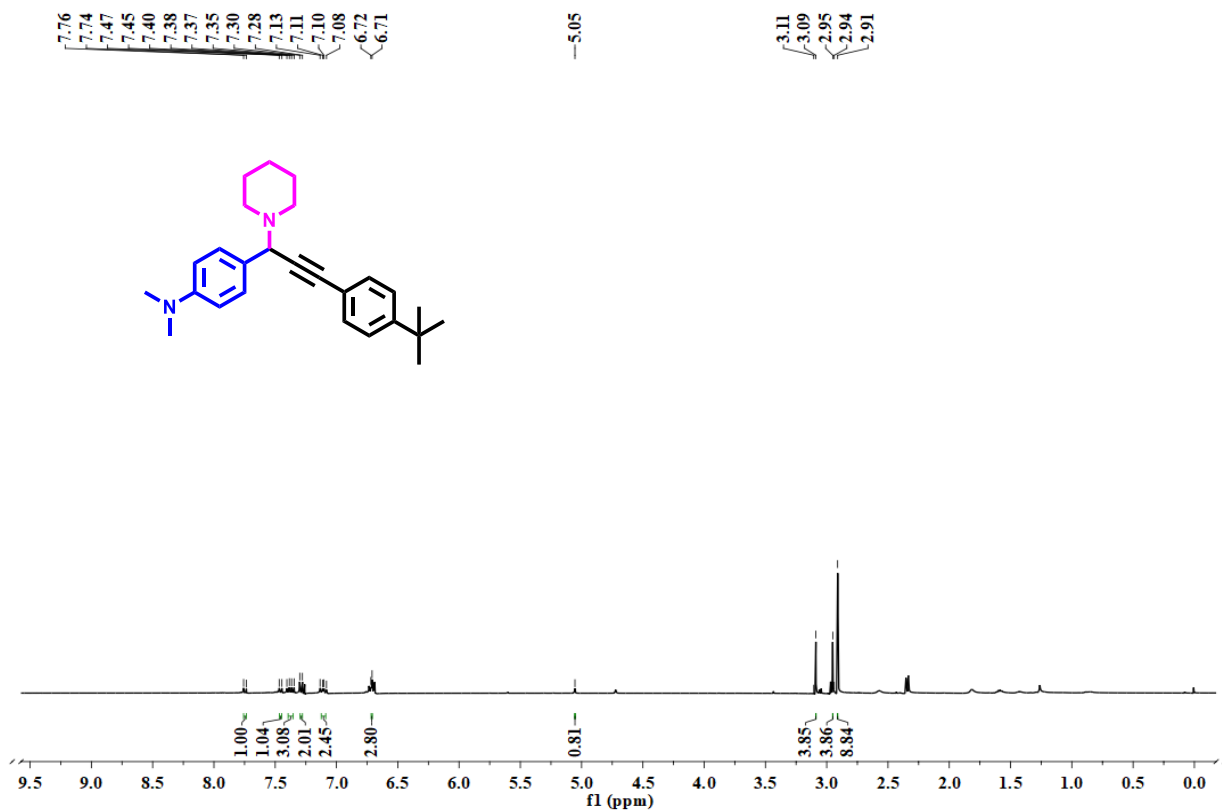

Figure S92: <sup>1</sup>H NMR spectrum of 8af taking CDCl<sub>3</sub> as solvent.

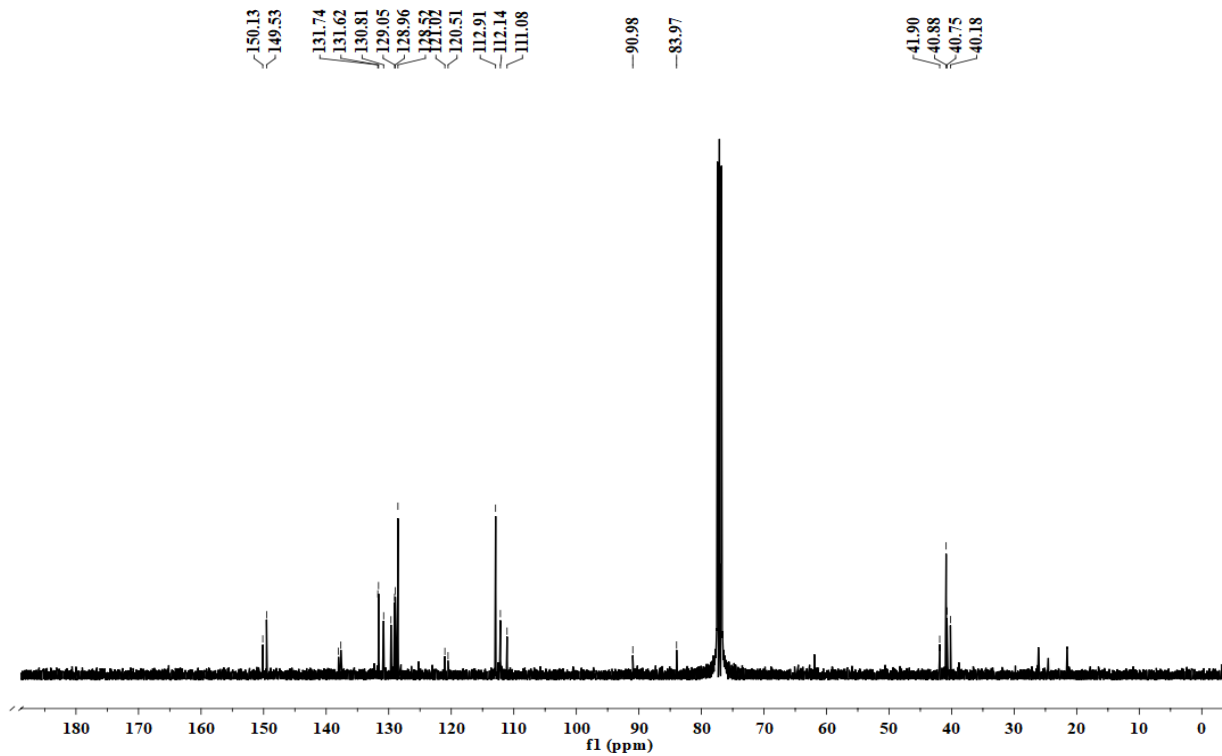

Figure S93: <sup>13</sup>C NMR spectrum of 8af taking CDCl<sub>3</sub> as solvent.

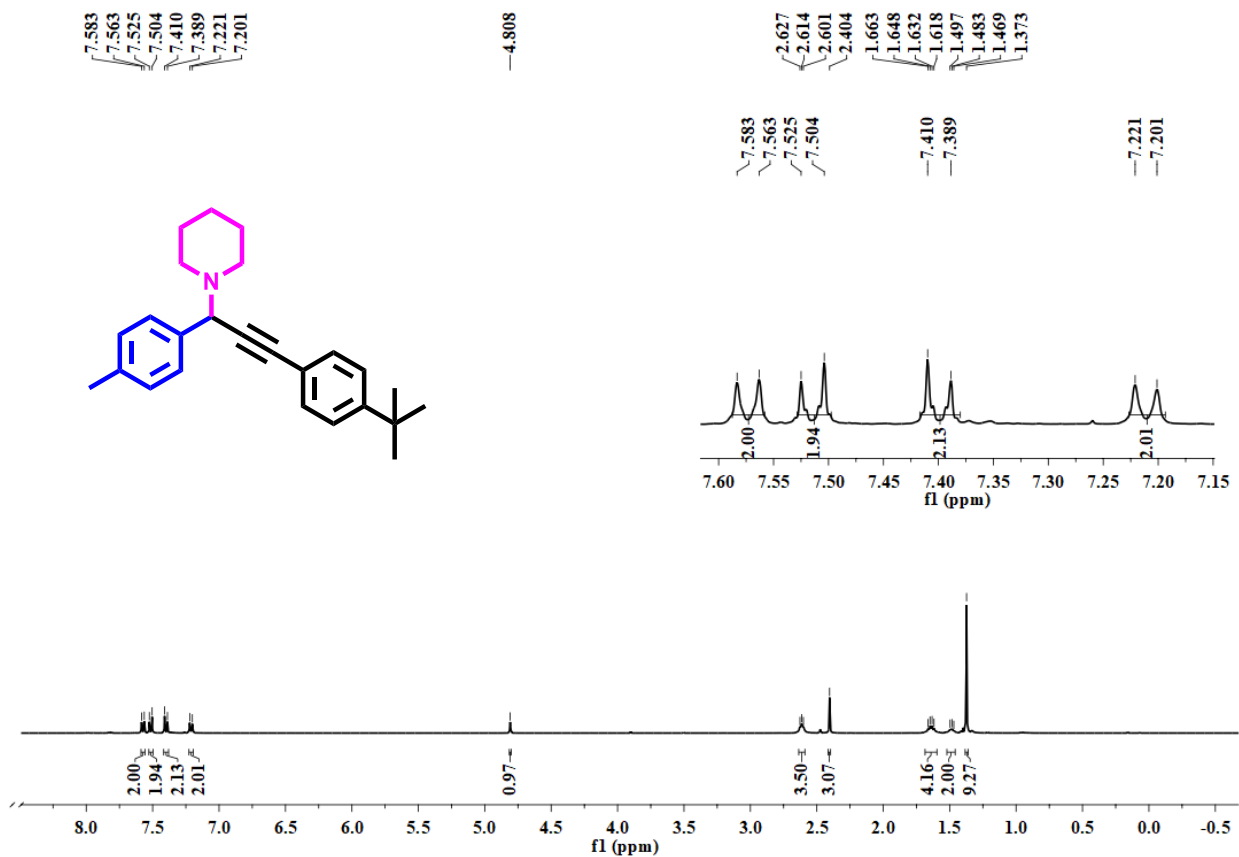

Figure S94: <sup>1</sup>H NMR spectrum of 8ag taking CDCl<sub>3</sub> as solvent.

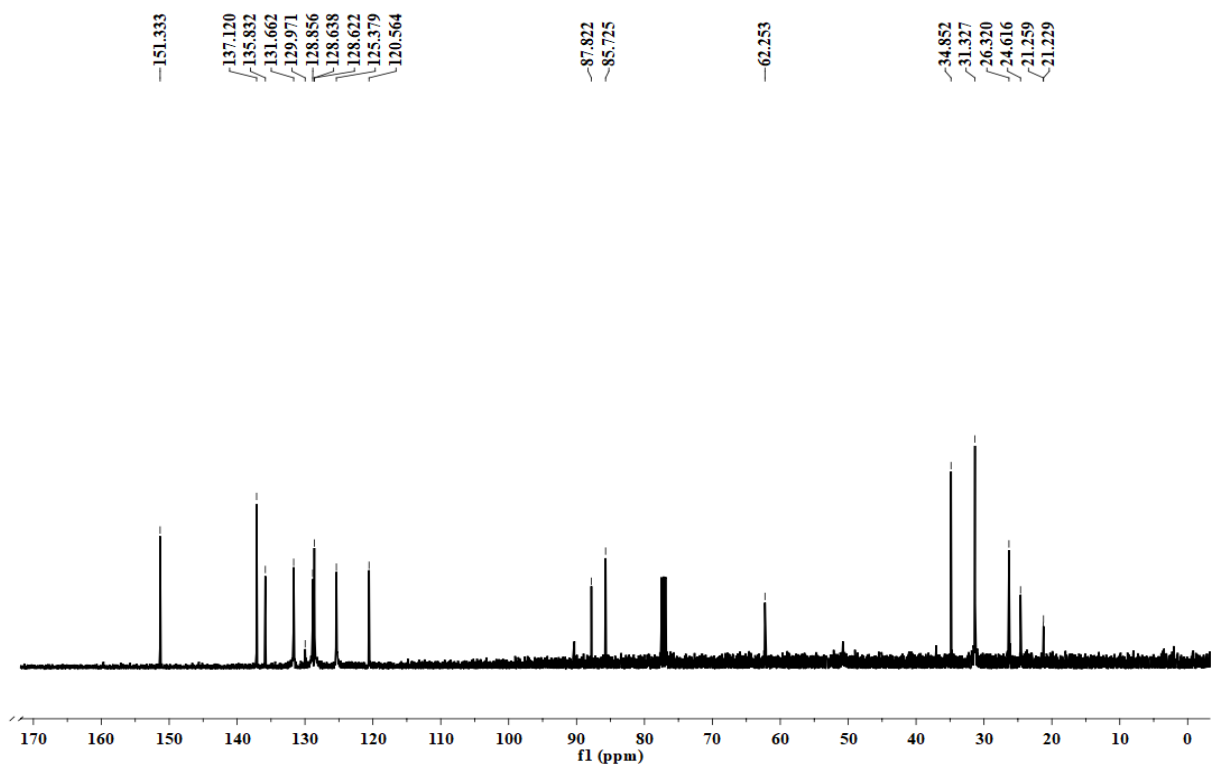

Figure S95: <sup>13</sup>C NMR spectrum of 8ag taking CDCl<sub>3</sub> as solvent.

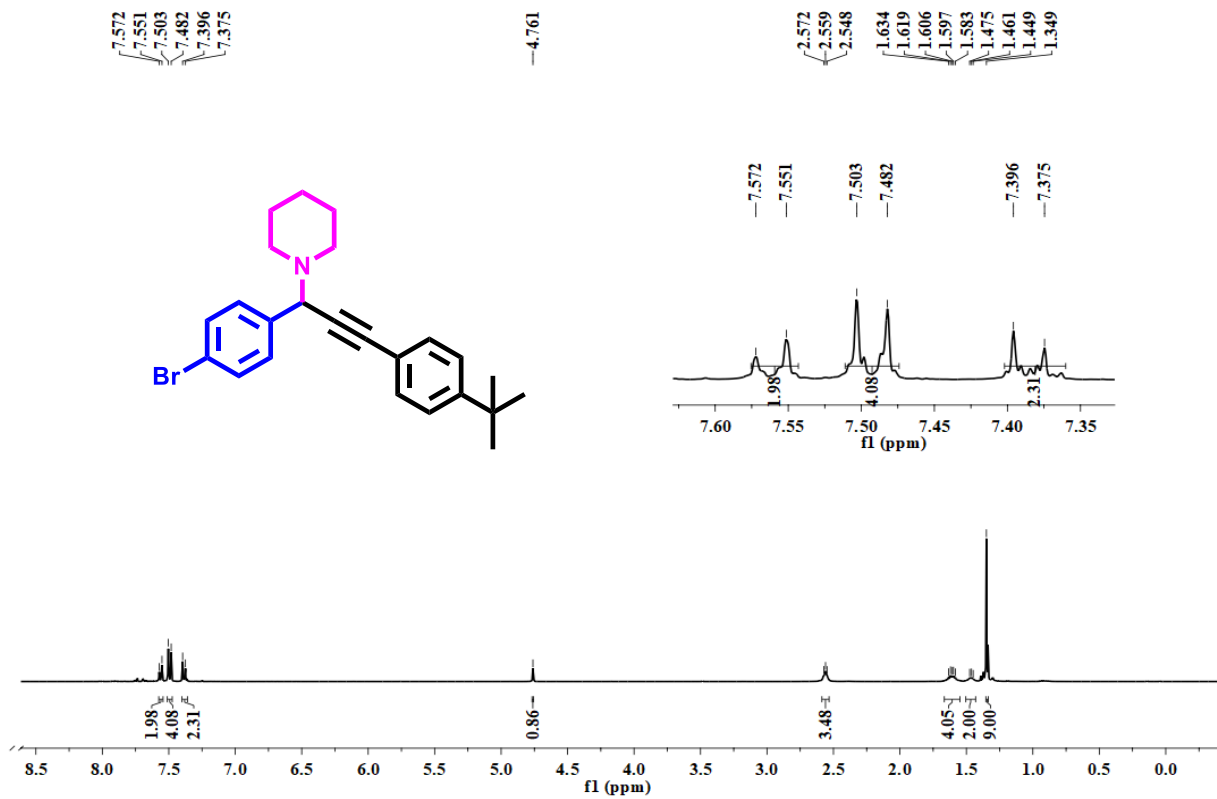

Figure S96: <sup>1</sup>H NMR spectrum of 8ah taking CDCl<sub>3</sub> as solvent.

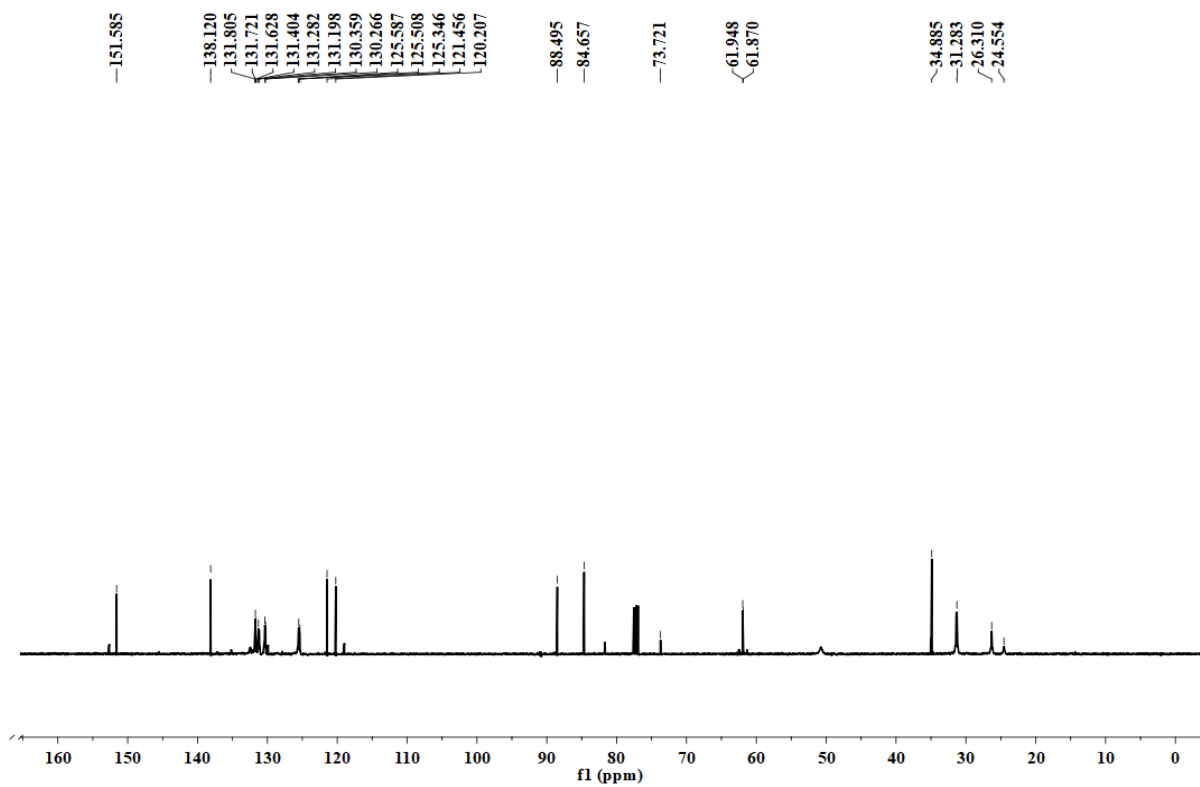

Figure S97: <sup>13</sup>C NMR spectrum of 8ah taking CDCl<sub>3</sub> as solvent.



5\_A-426  
single\_pulse

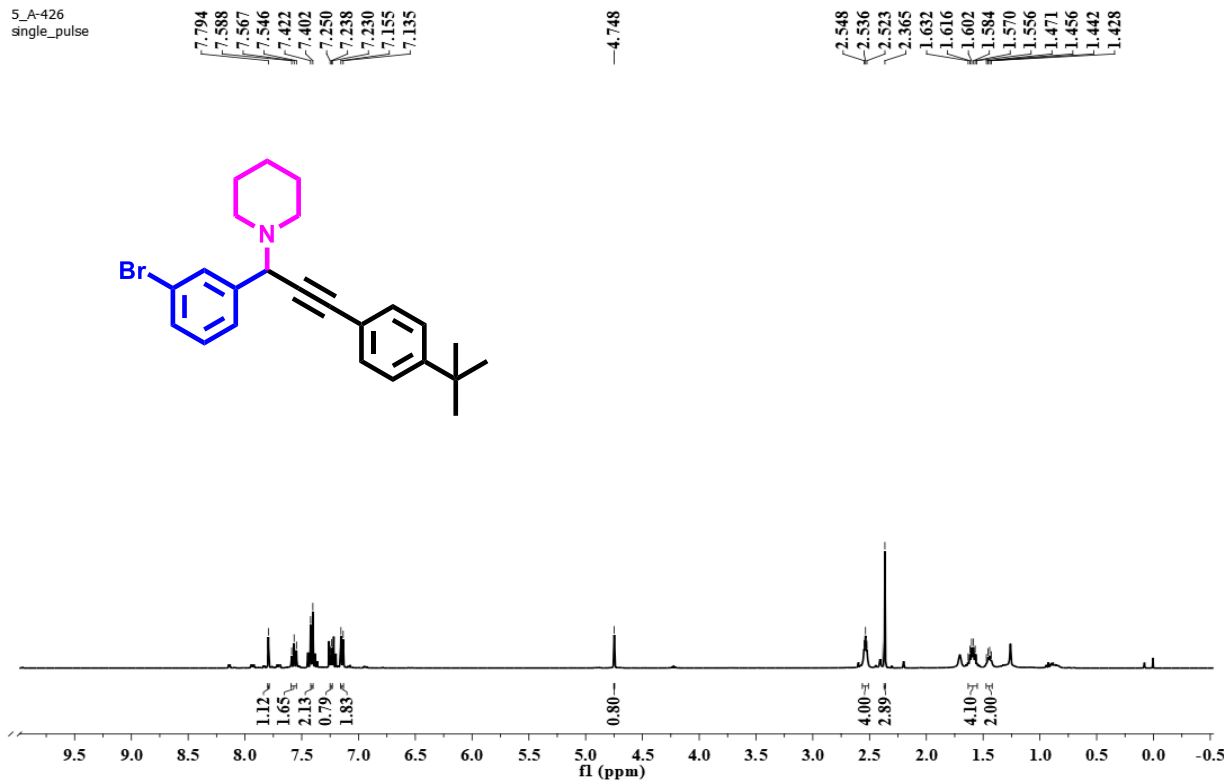

Figure S98: <sup>1</sup>H NMR spectrum of 8ai taking CDCl<sub>3</sub> as solvent.

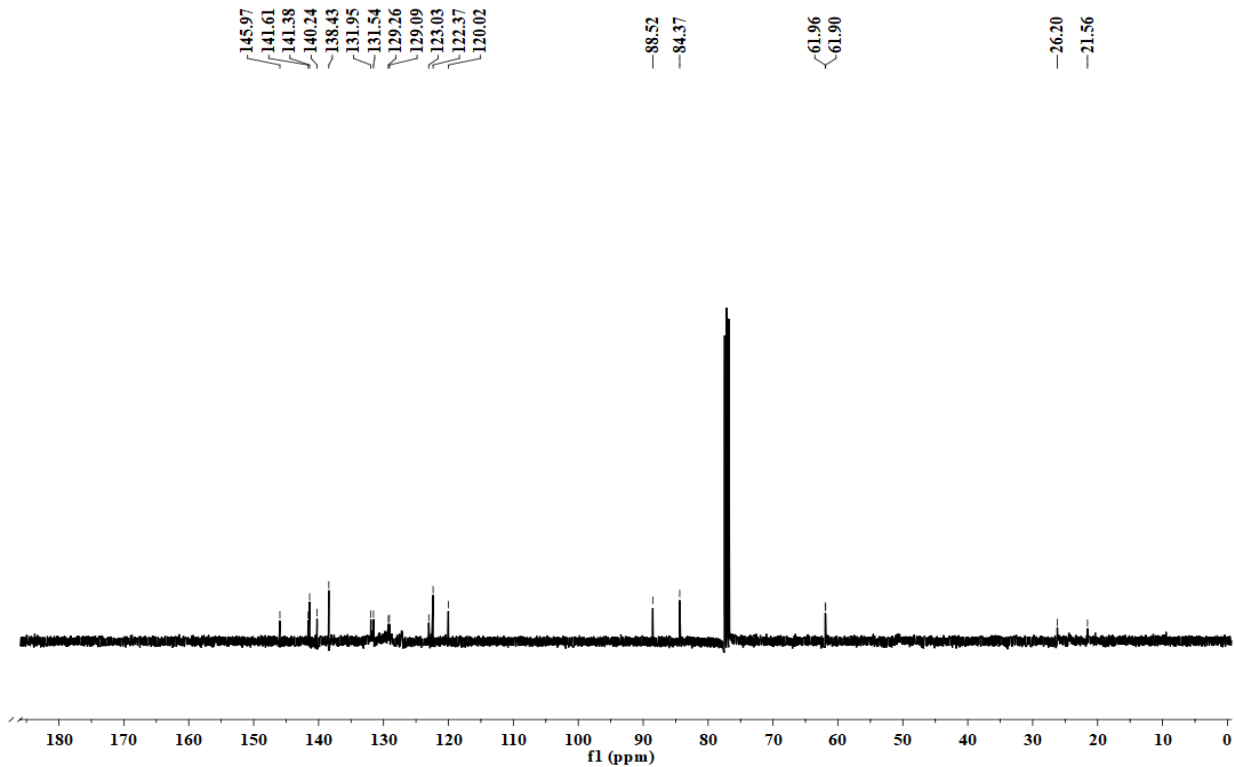

Figure S99: <sup>13</sup>C NMR spectrum of 8ai taking CDCl<sub>3</sub> as solvent.

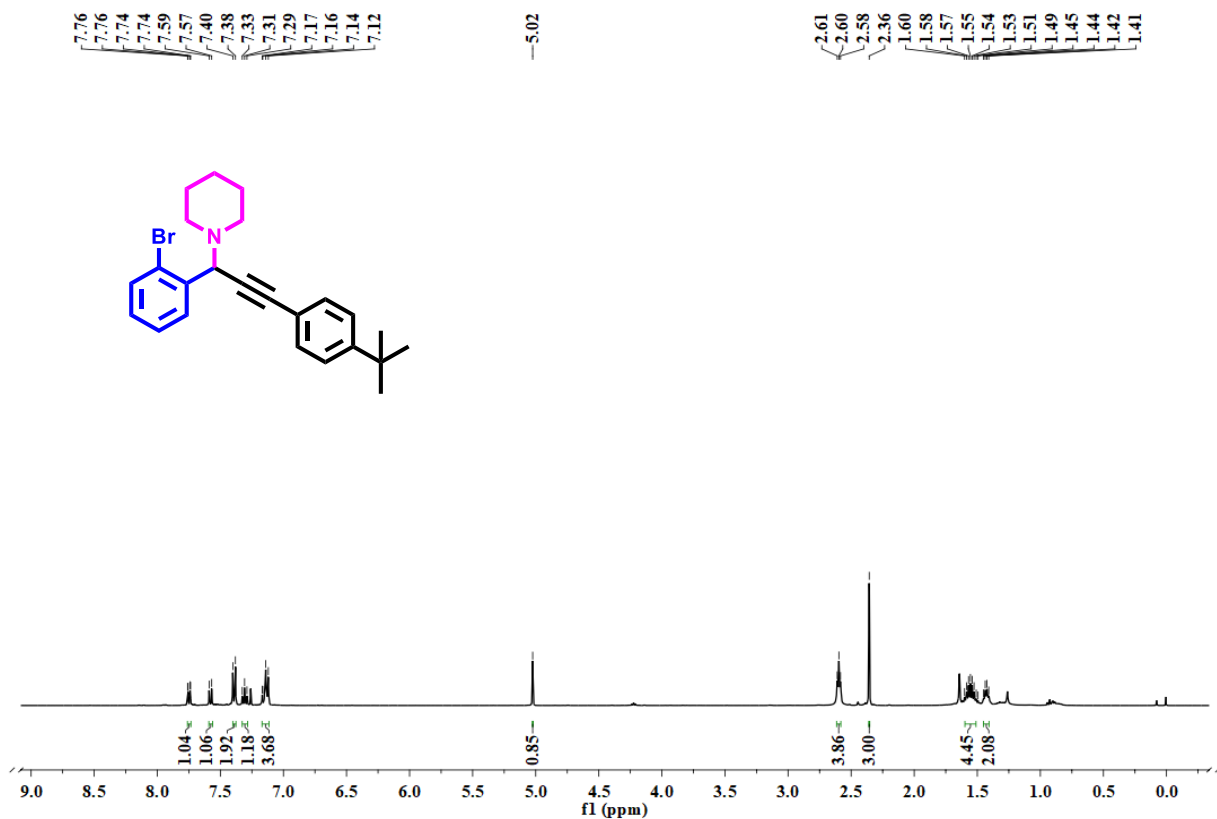

Figure S100: <sup>1</sup>H NMR spectrum of 8aj taking CDCl<sub>3</sub> as solvent.

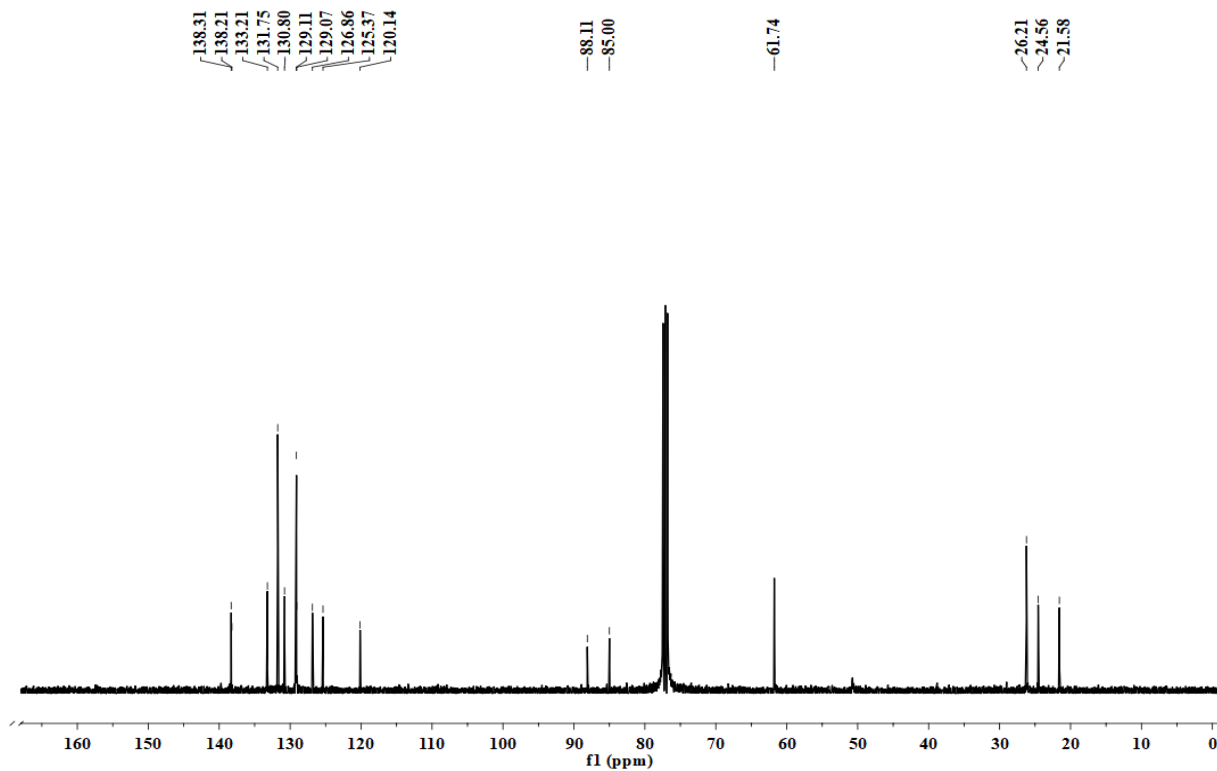

Figure S101: <sup>13</sup>C NMR spectrum of 8aj taking CDCl<sub>3</sub> as solvent.

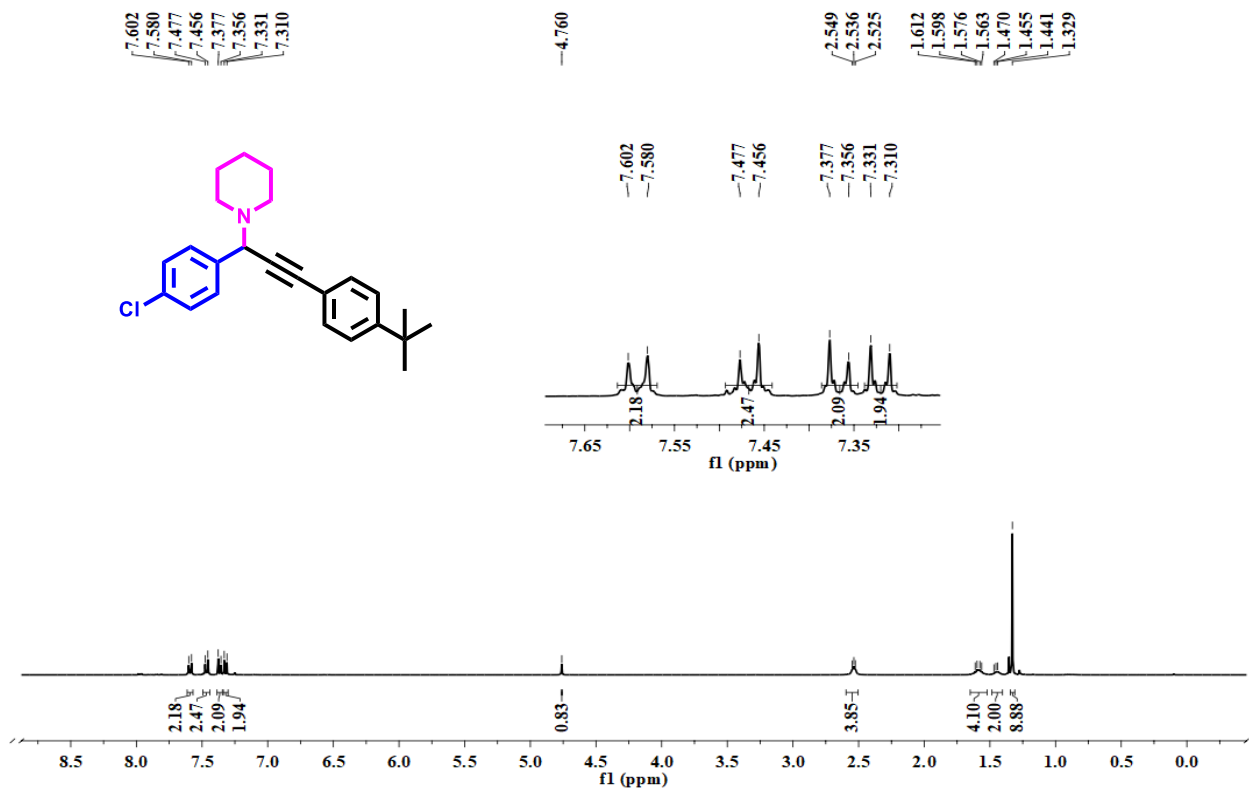

Figure S102: <sup>1</sup>H NMR spectrum of 8ak taking CDCl<sub>3</sub> as solvent.

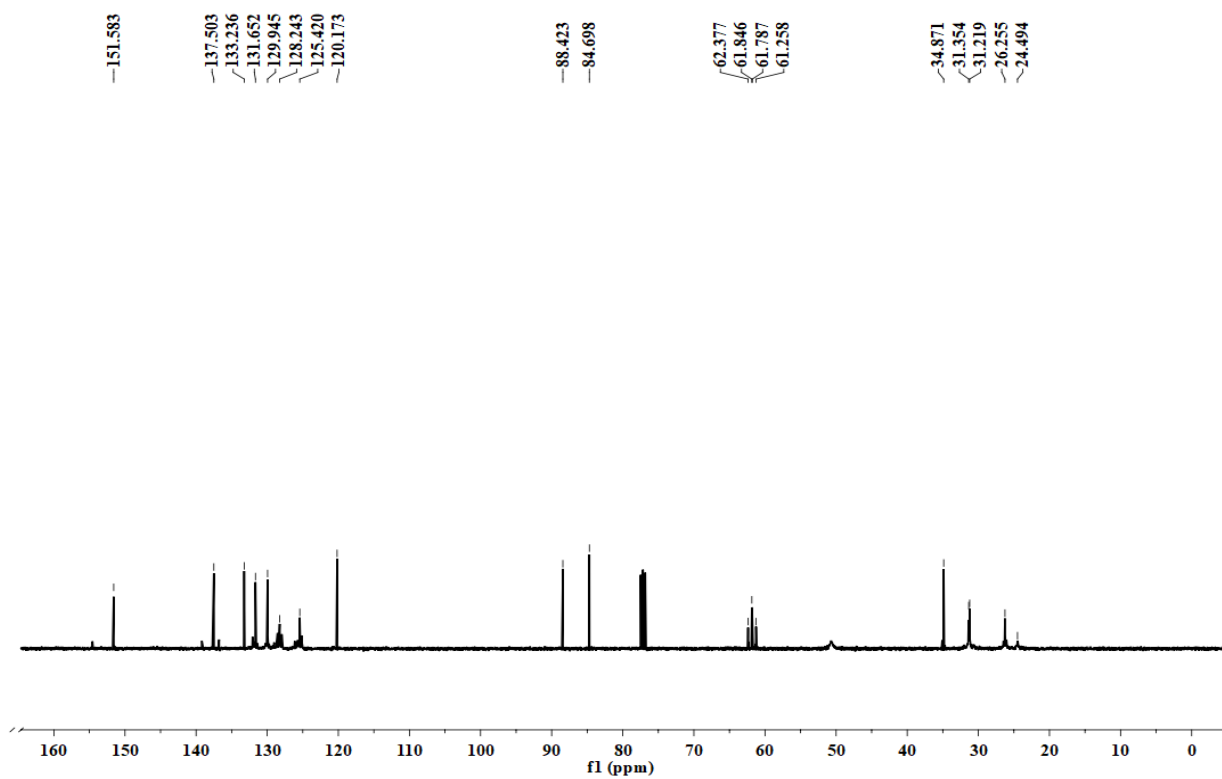

Figure S103: <sup>13</sup>C NMR spectrum of 8ak taking CDCl<sub>3</sub> as solvent.

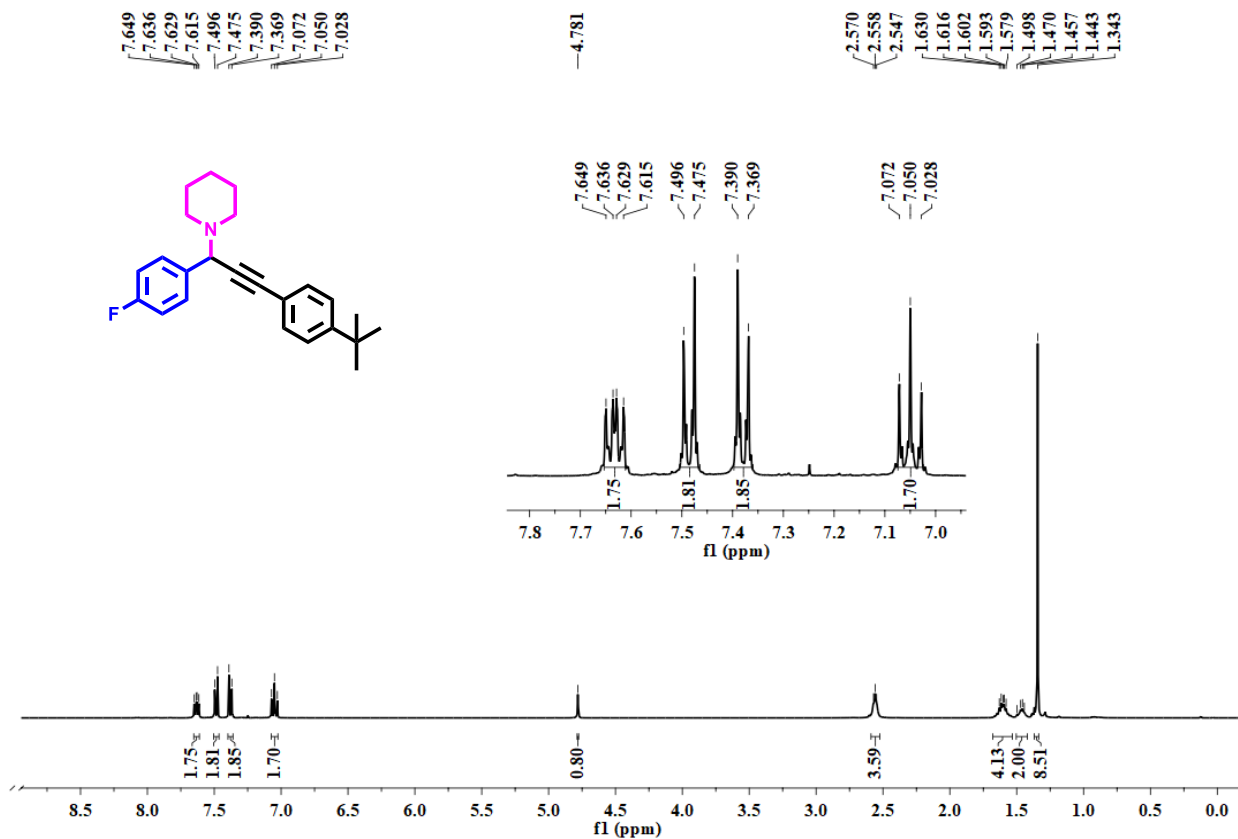

**Figure S104:**  $^1\text{H}$  NMR spectrum of 8ak taking  $\text{CDCl}_3$  as solvent.

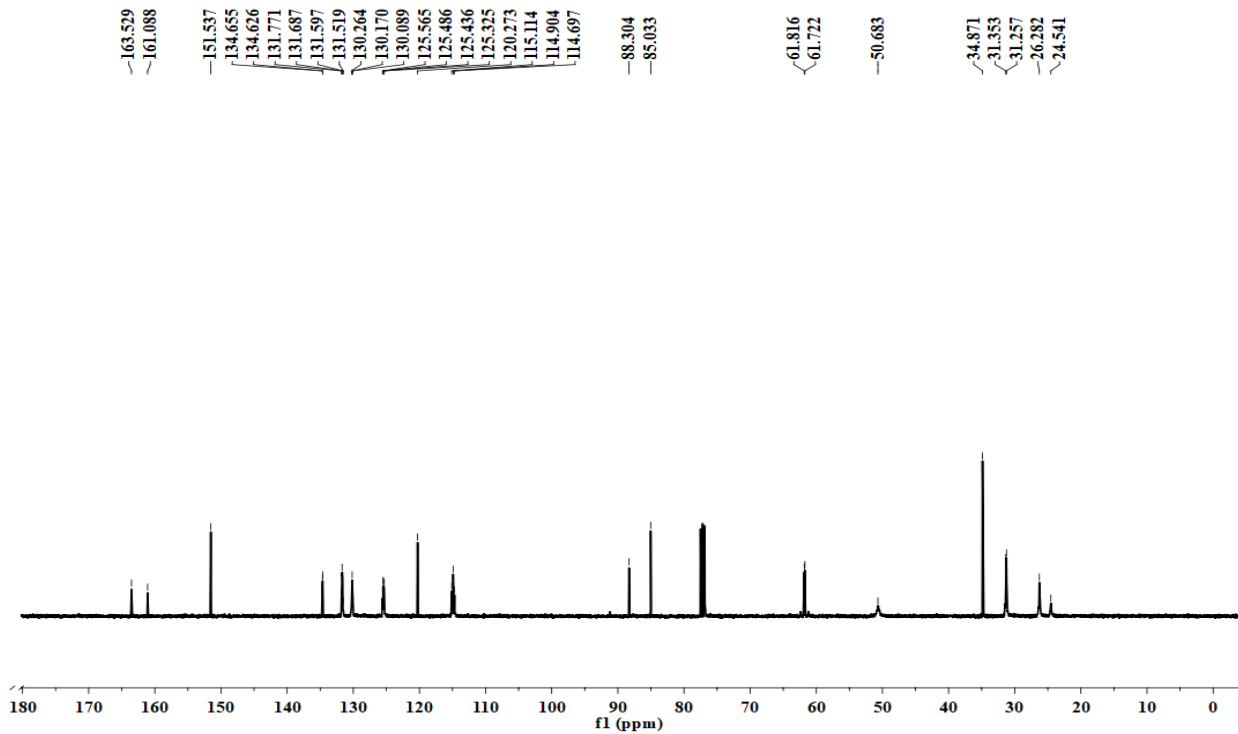

**Figure S105:**  $^{13}\text{C}$  NMR spectrum of 8ak taking  $\text{CDCl}_3$  as solvent.

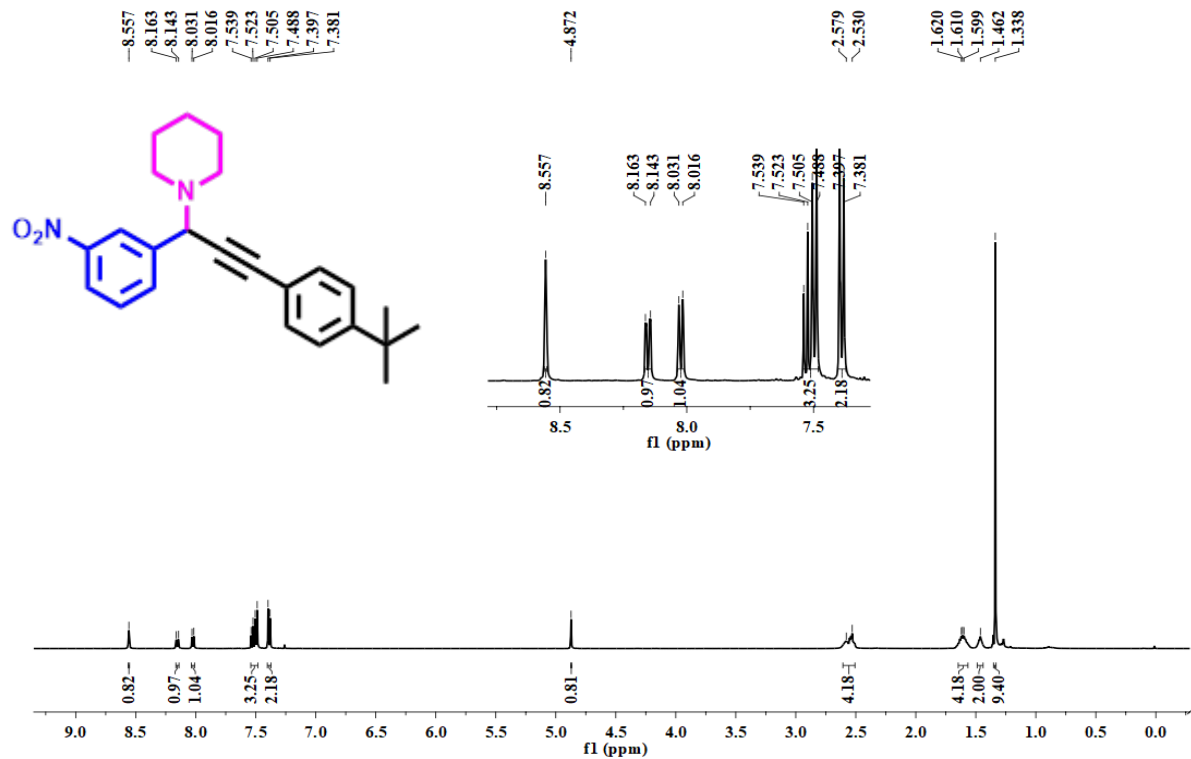

Figure S106: <sup>1</sup>H NMR spectrum of 8al taking CDCl<sub>3</sub> as solvent.

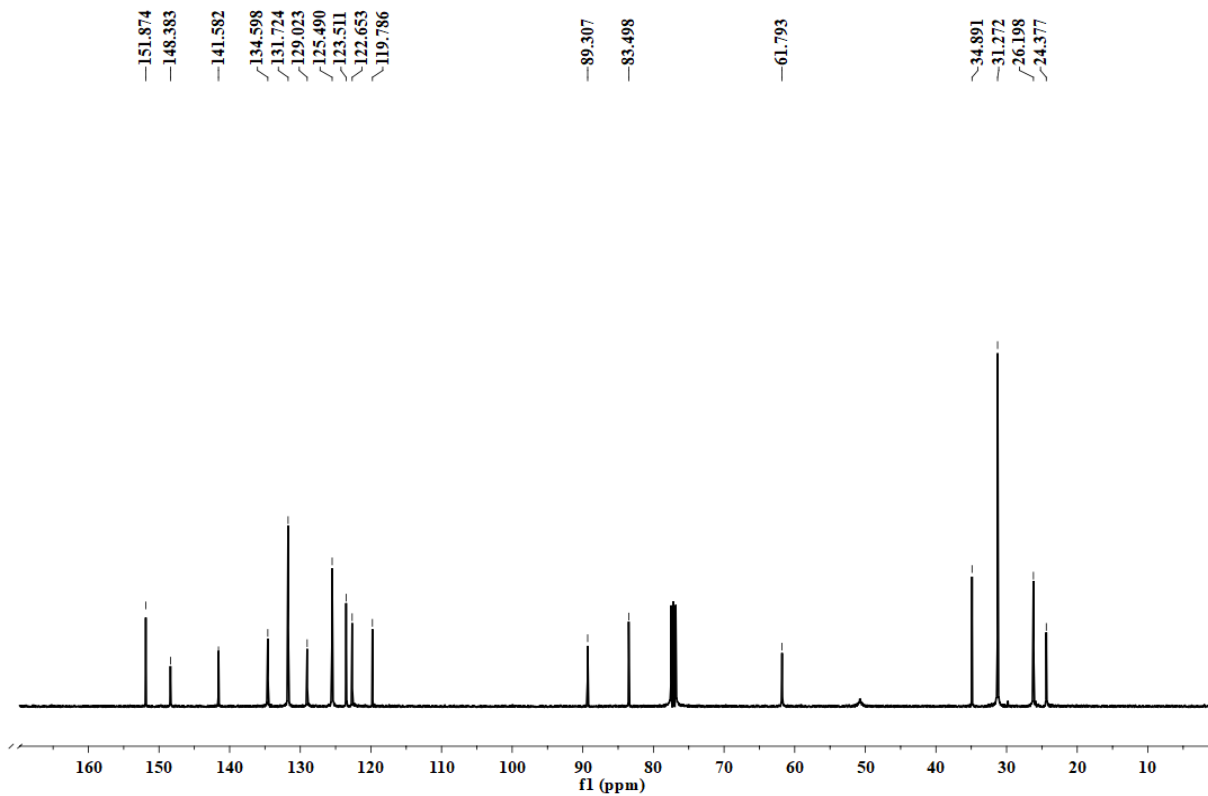

Figure S107: <sup>13</sup>C NMR spectrum of 8al taking CDCl<sub>3</sub> as solvent.

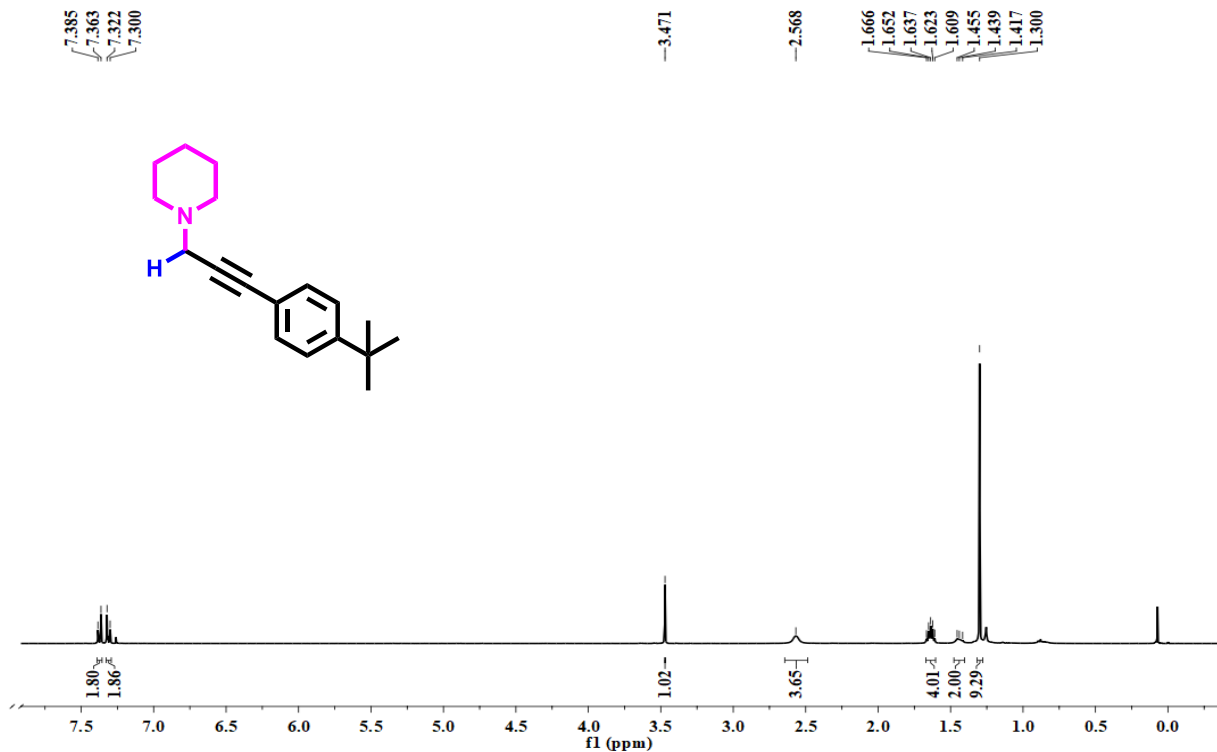

Figure S108: <sup>1</sup>H NMR spectrum of 8am taking CDCl<sub>3</sub> as solvent.

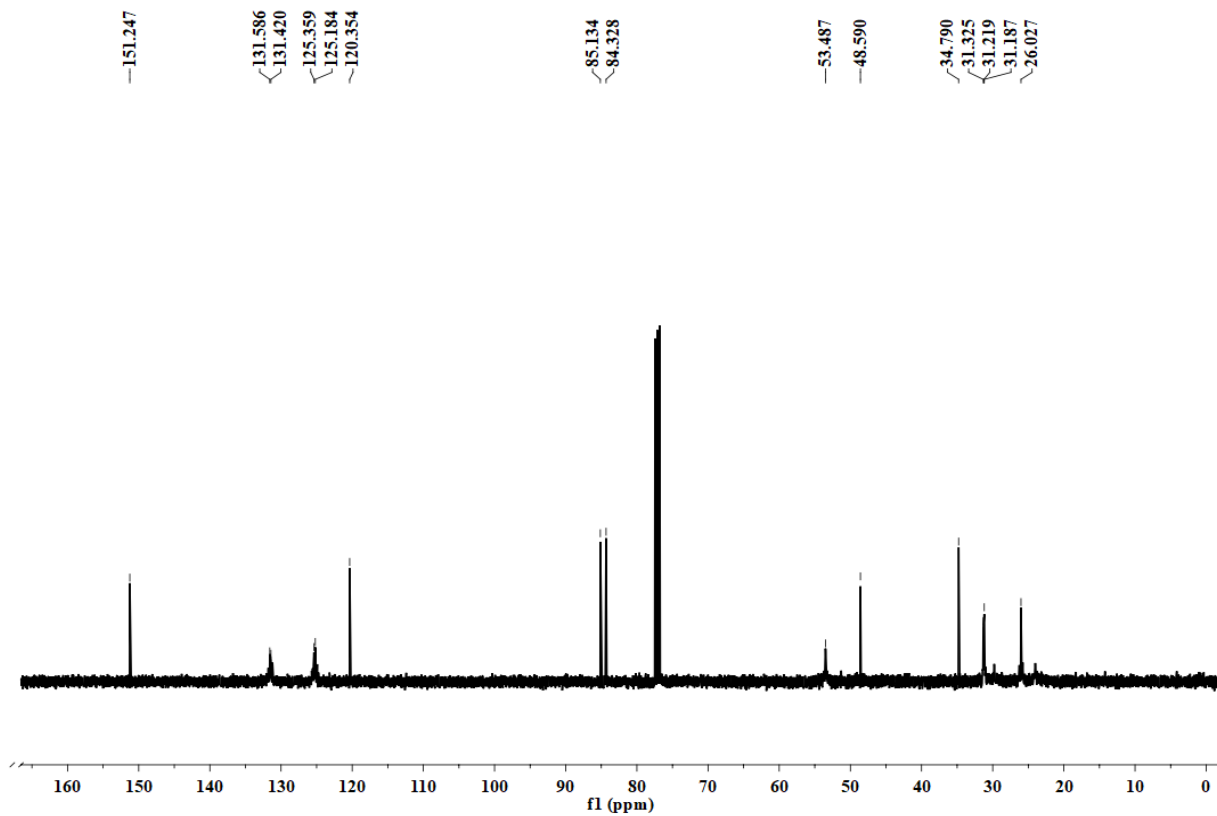

Figure S109: <sup>13</sup>C NMR spectrum of 8am taking CDCl<sub>3</sub> as solvent.

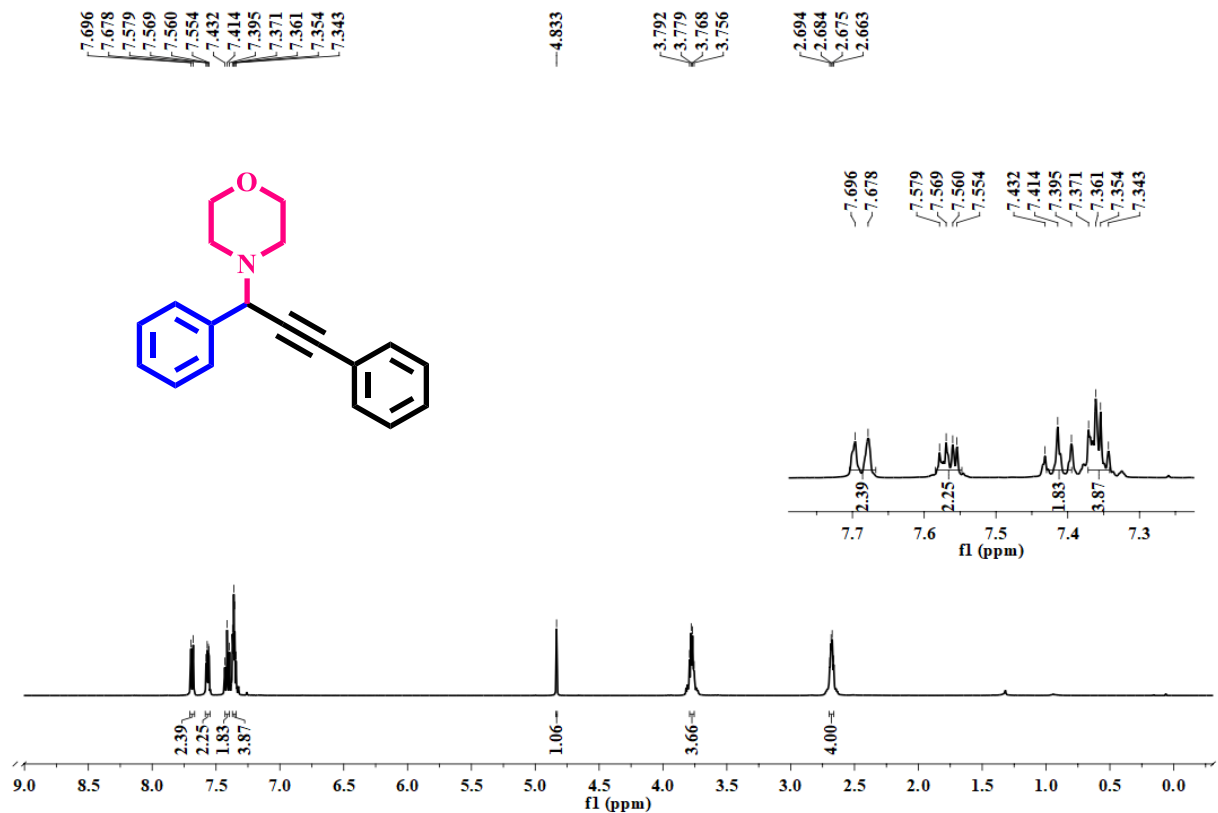

Figure S110: <sup>1</sup>H NMR spectrum of 9aa taking CDCl<sub>3</sub> as solvent.

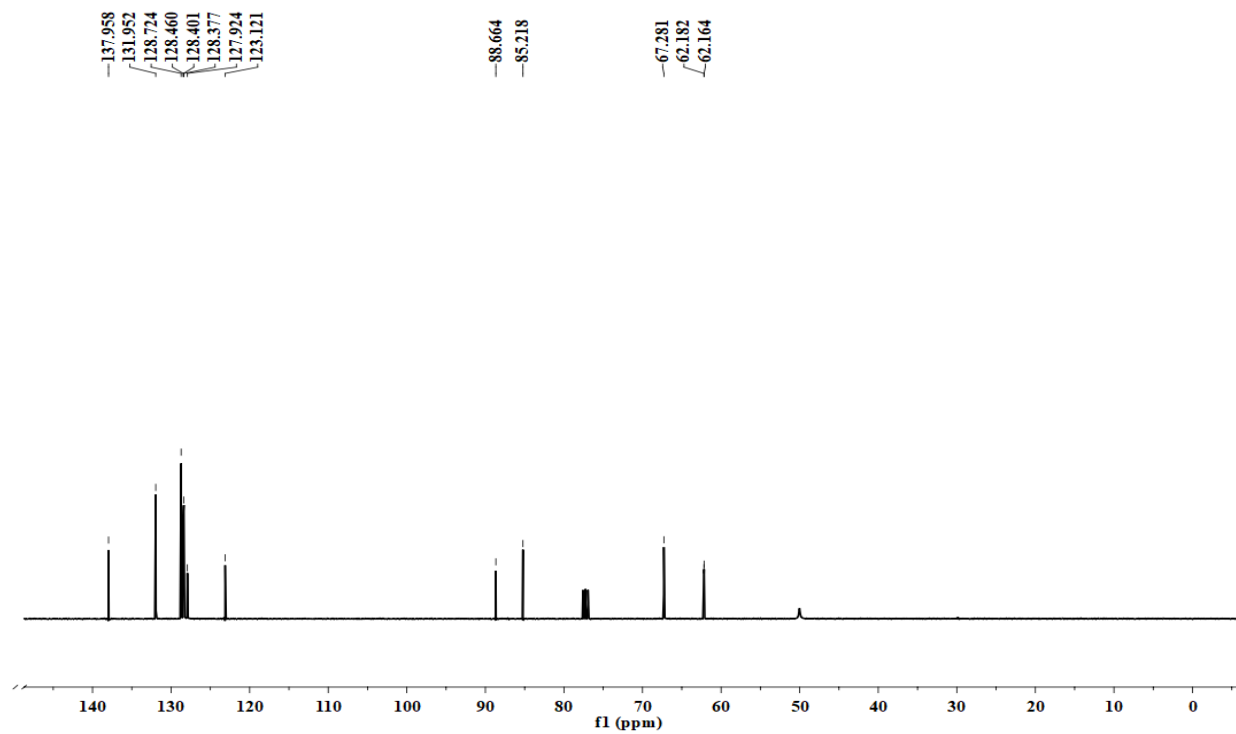

Figure S111: <sup>13</sup>C NMR spectrum of 9aa taking CDCl<sub>3</sub> as solvent.

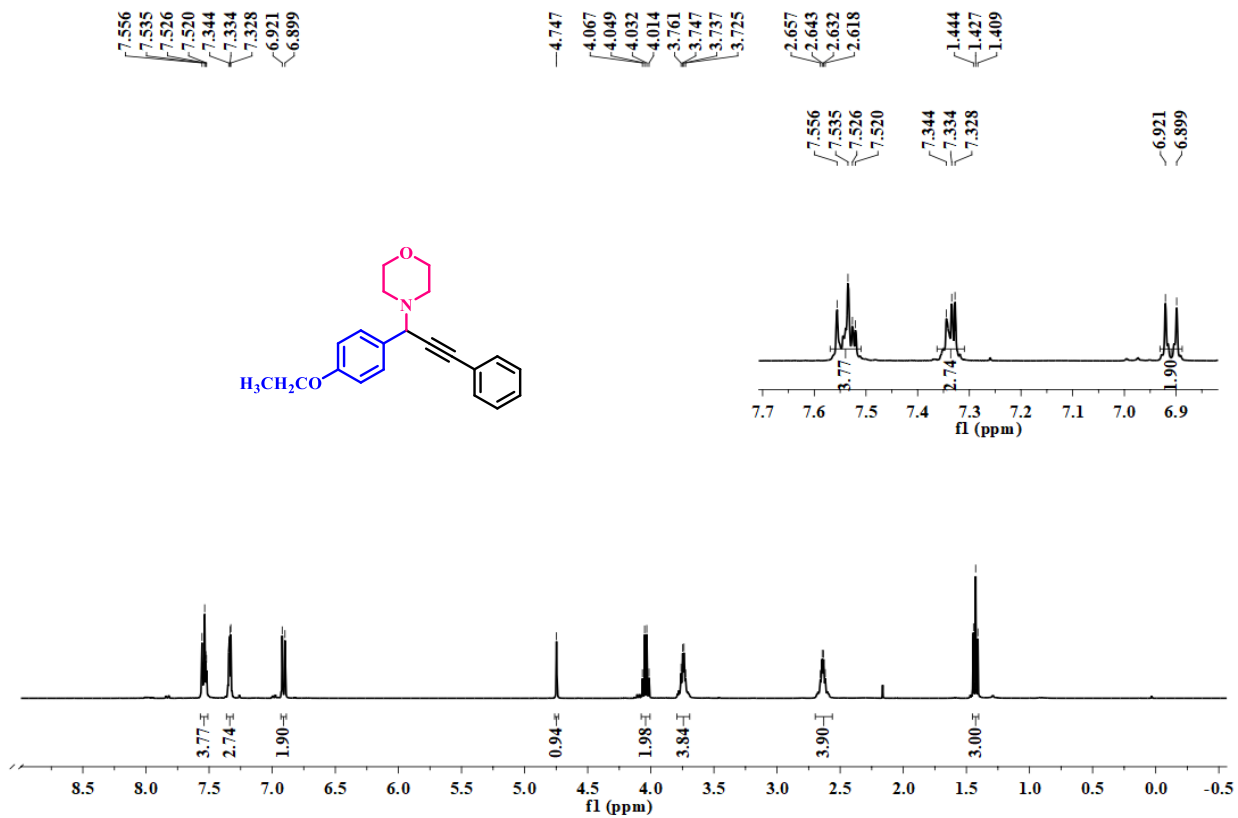

Figure S112: <sup>1</sup>H NMR spectrum of 9ab taking CDCl<sub>3</sub> as solvent.

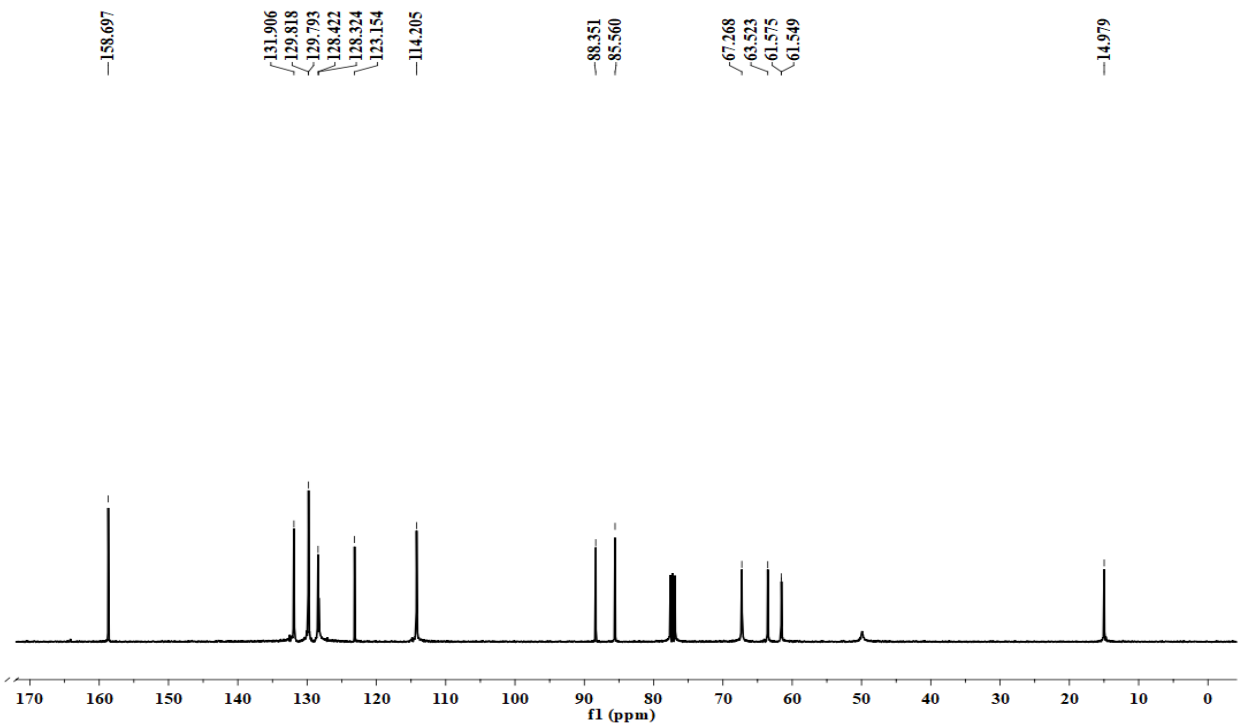

Figure S113: <sup>13</sup>C NMR spectrum of 9ab taking CDCl<sub>3</sub> as solvent.



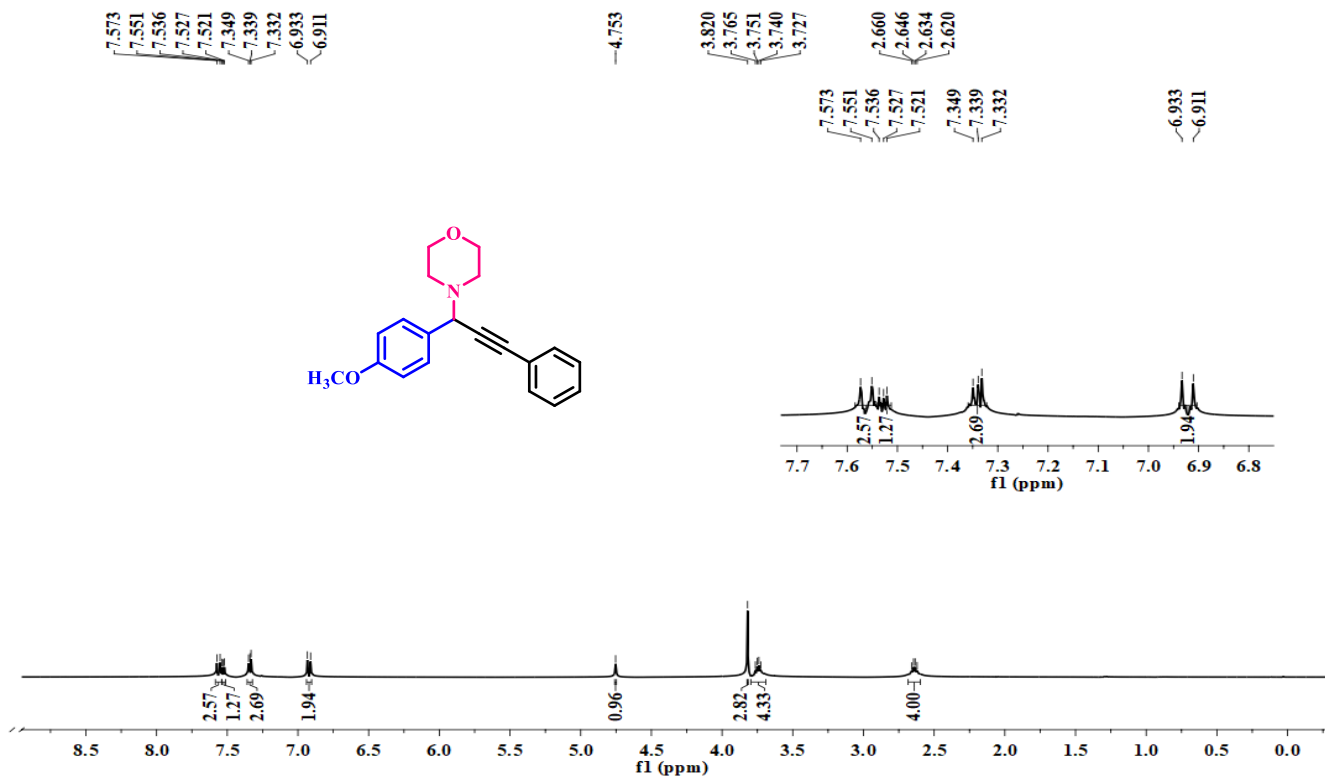

Figure S114: <sup>1</sup>H NMR spectrum of 9ac taking CDCl<sub>3</sub> as solvent.

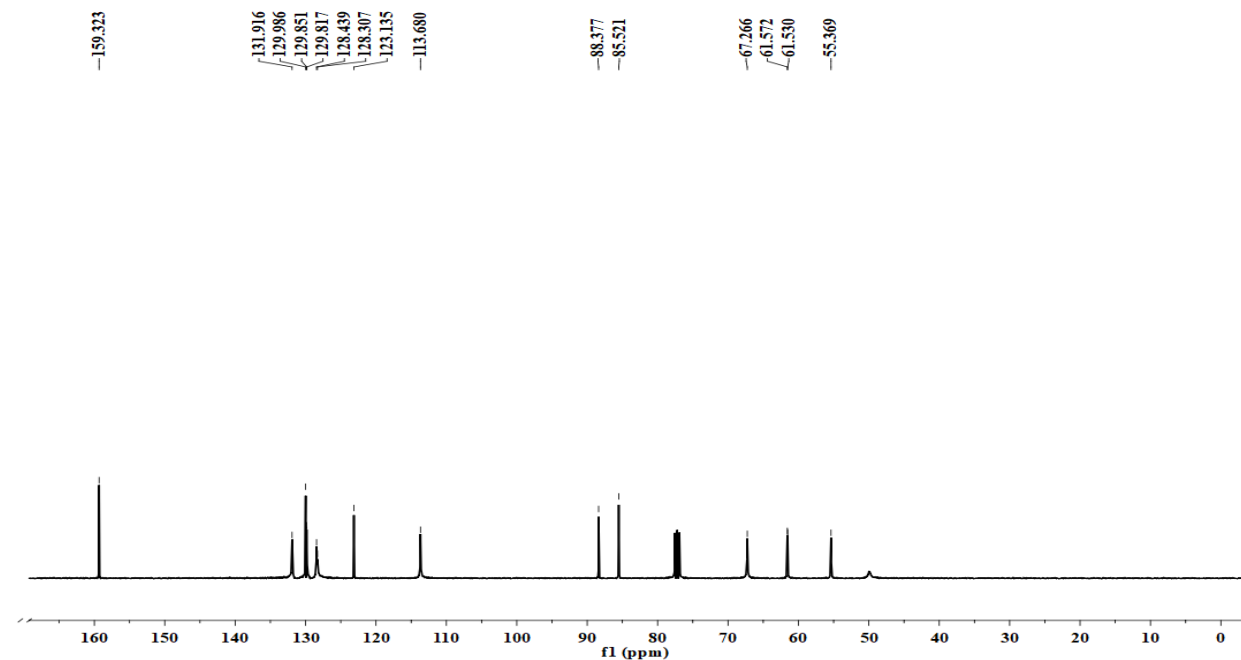

Figure S115: <sup>13</sup>C NMR spectrum of 9ac taking CDCl<sub>3</sub> as solvent.

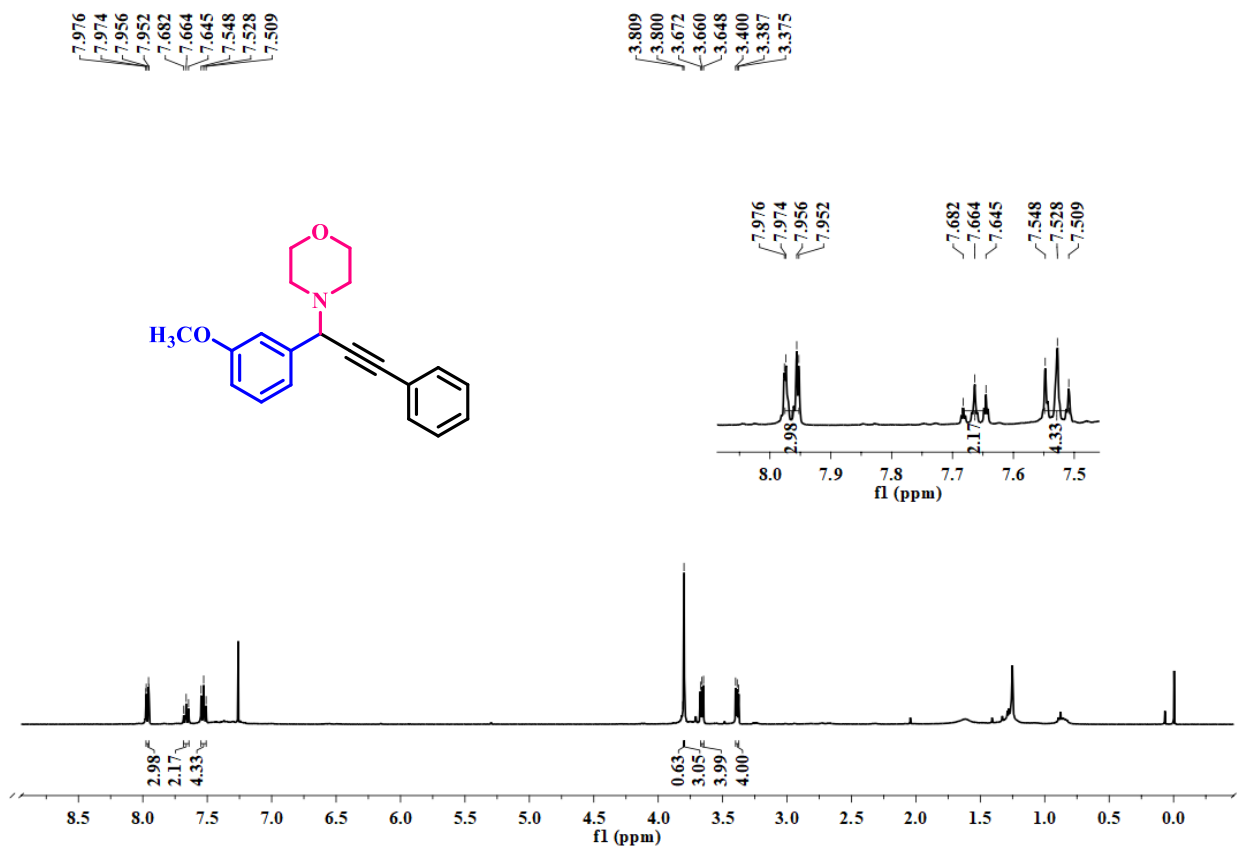

Figure S116: <sup>1</sup>H NMR spectrum of 9ad taking CDCl<sub>3</sub> as solvent.

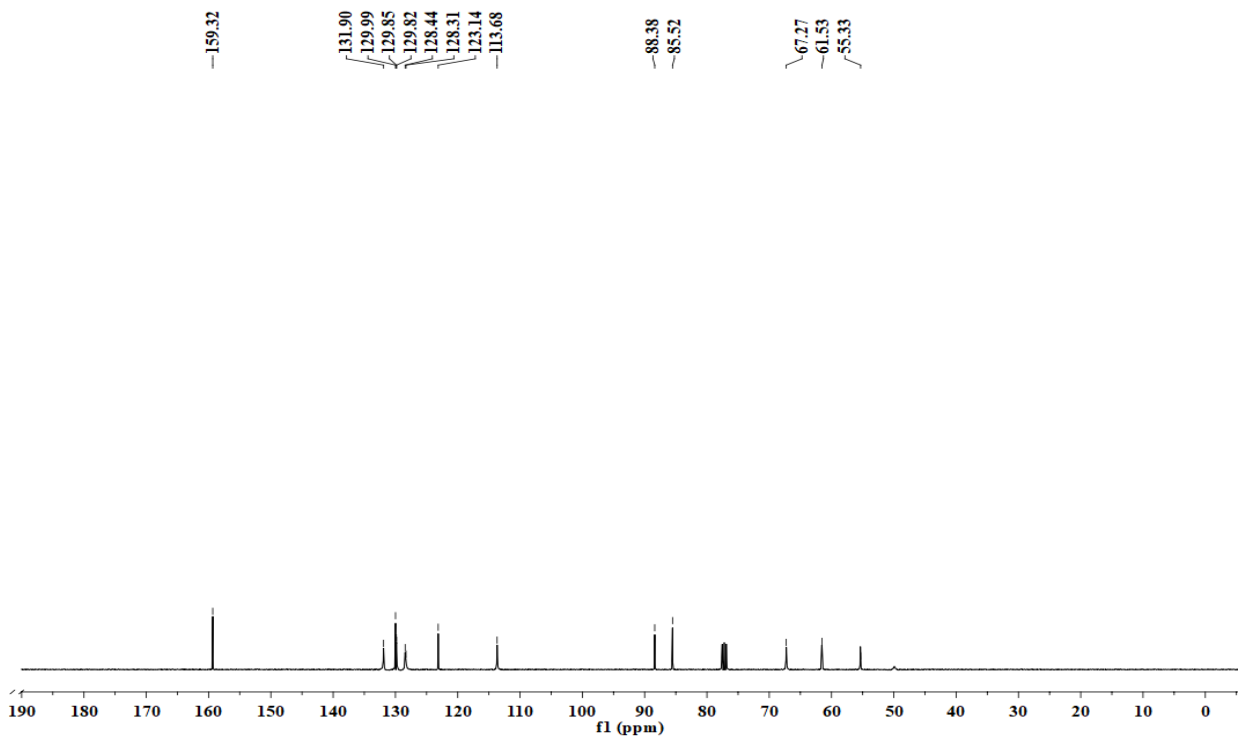

Figure S117: <sup>13</sup>C NMR spectrum of 9ad taking CDCl<sub>3</sub> as solvent.

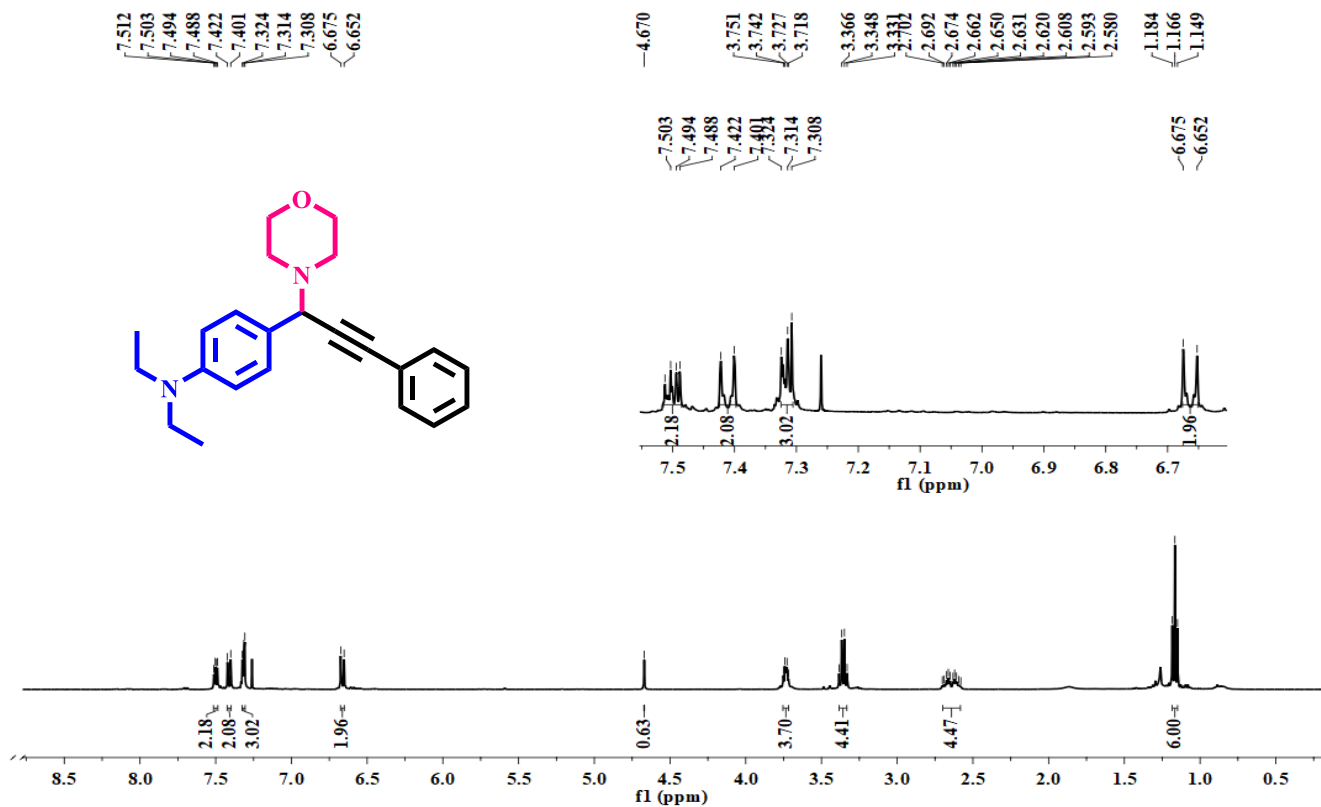

Figure S118: <sup>1</sup>H NMR spectrum of 9ae taking CDCl<sub>3</sub> as solvent.

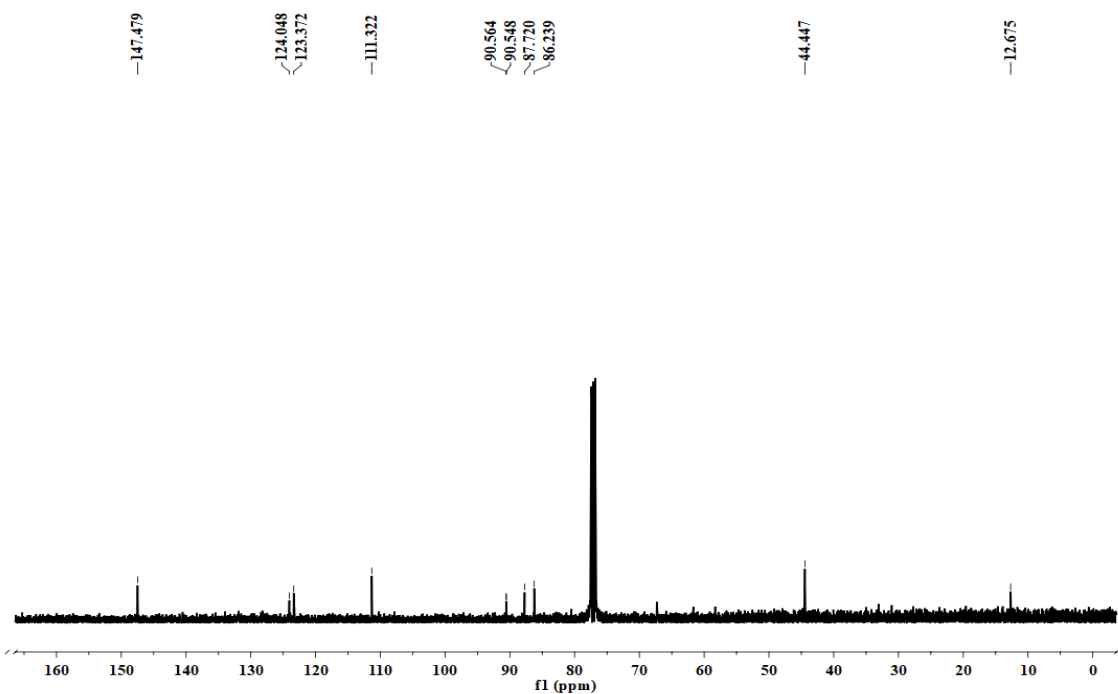

Figure S119: <sup>13</sup>C NMR spectrum of 9ae taking CDCl<sub>3</sub> as solvent.

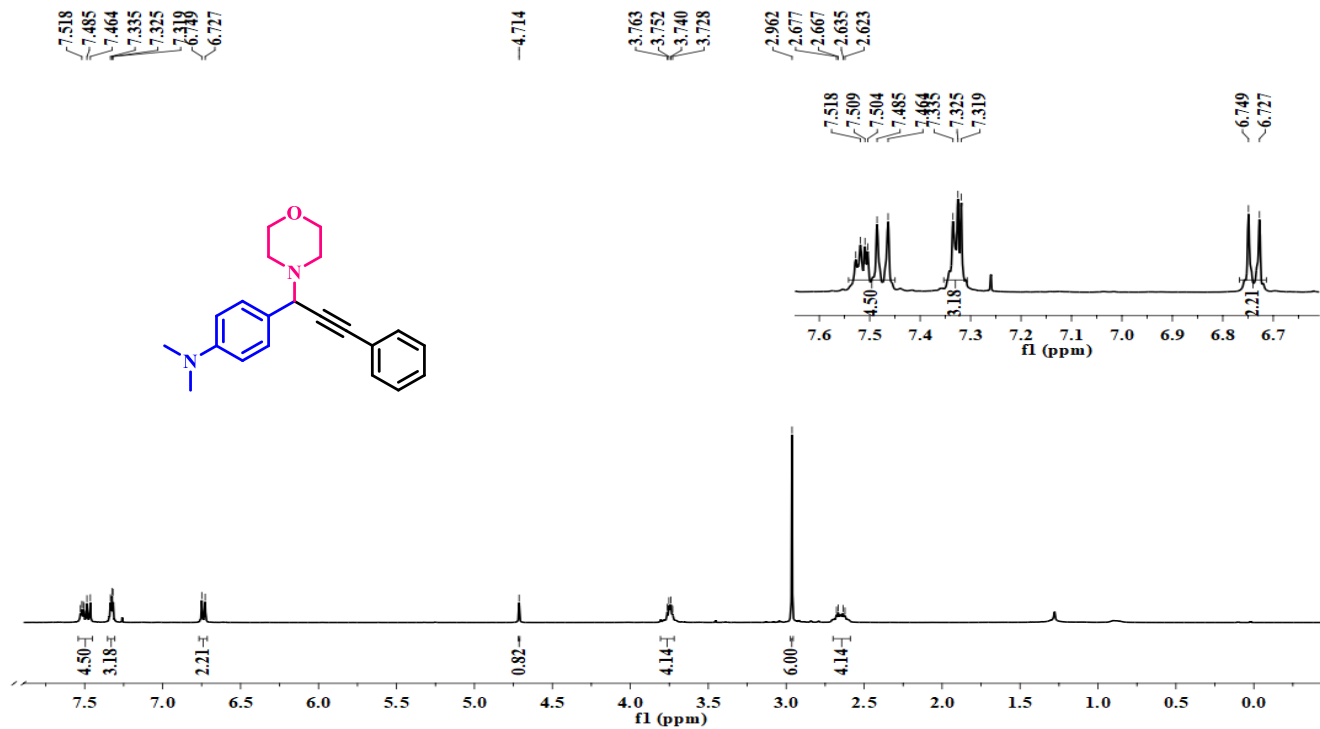

Figure S120: <sup>1</sup>H NMR spectrum of 9af taking CDCl<sub>3</sub> as solvent.

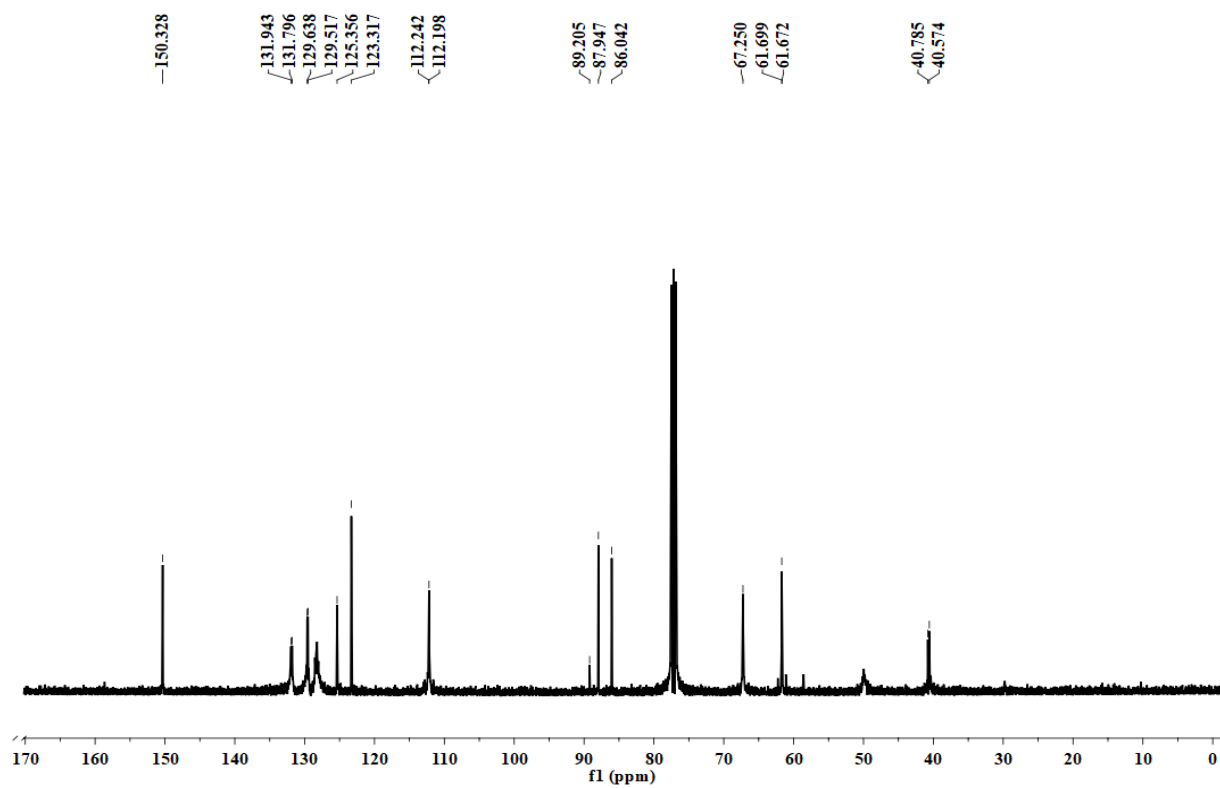

Figure S121: <sup>13</sup>C NMR spectrum of 9af taking CDCl<sub>3</sub> as solvent.

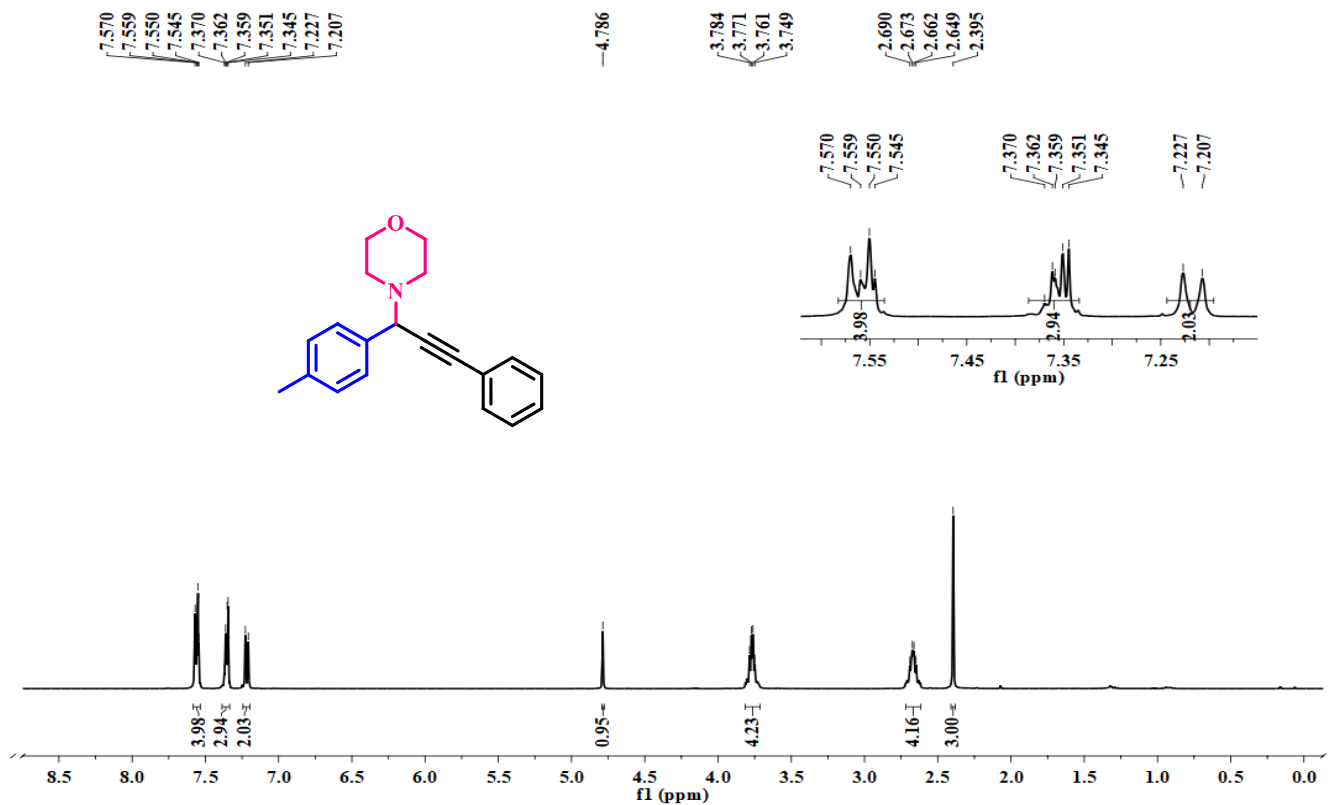

Figure S122: <sup>1</sup>H NMR spectrum of 9ag taking CDCl<sub>3</sub> as solvent.

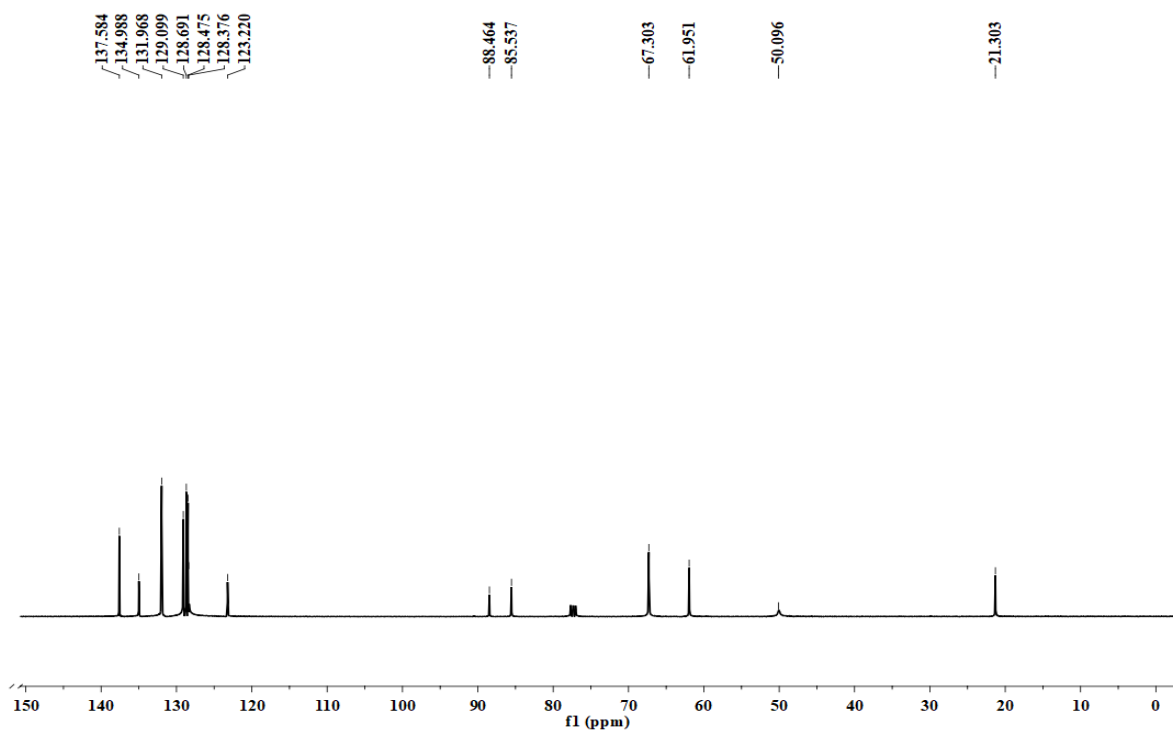

Figure S123: <sup>13</sup>C NMR spectrum of 9ag taking CDCl<sub>3</sub> as solvent.

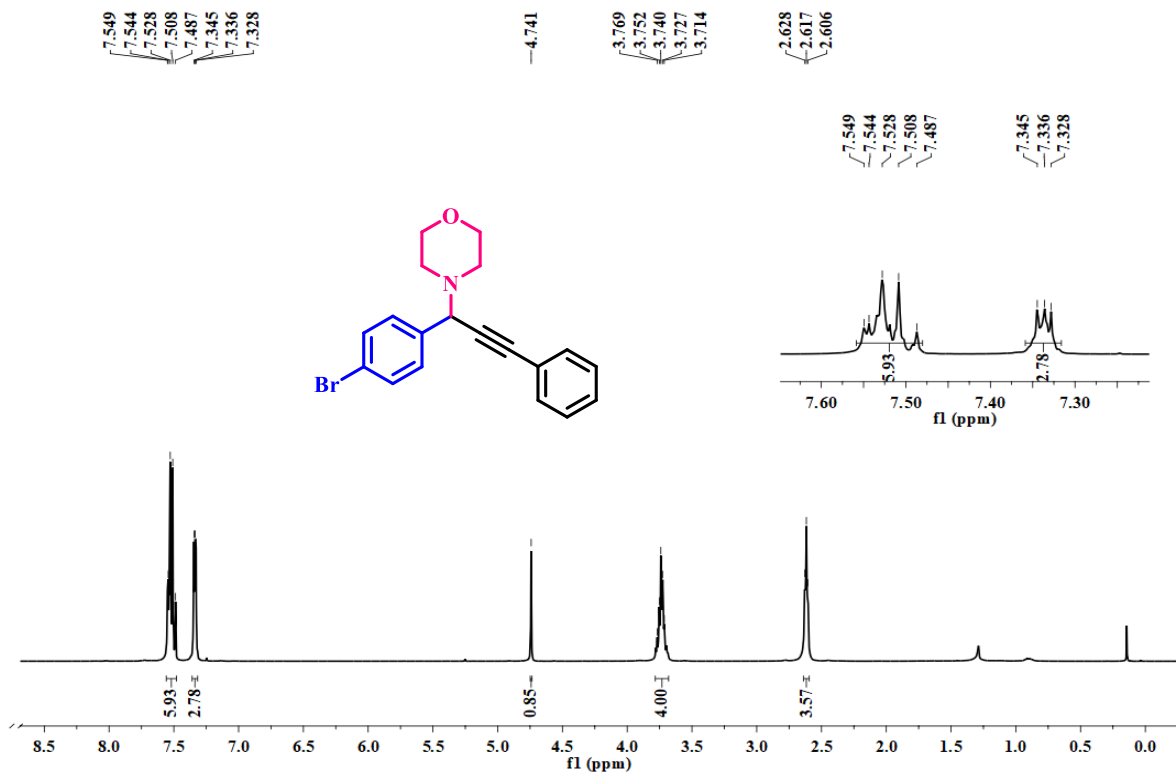

Figure S124: <sup>1</sup>H NMR spectrum of taking 9ah CDCl<sub>3</sub> as solvent.

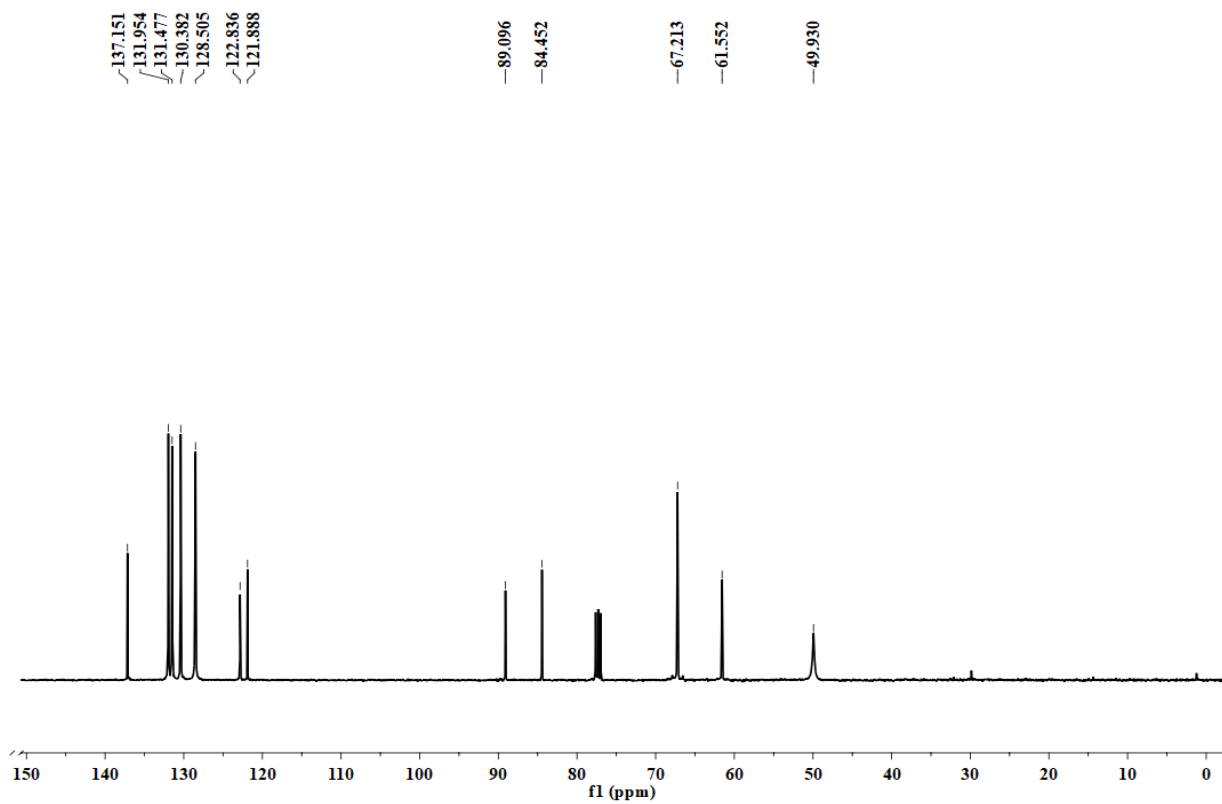

Figure S125: <sup>13</sup>C NMR spectrum of 9ah taking CDCl<sub>3</sub> as solvent.

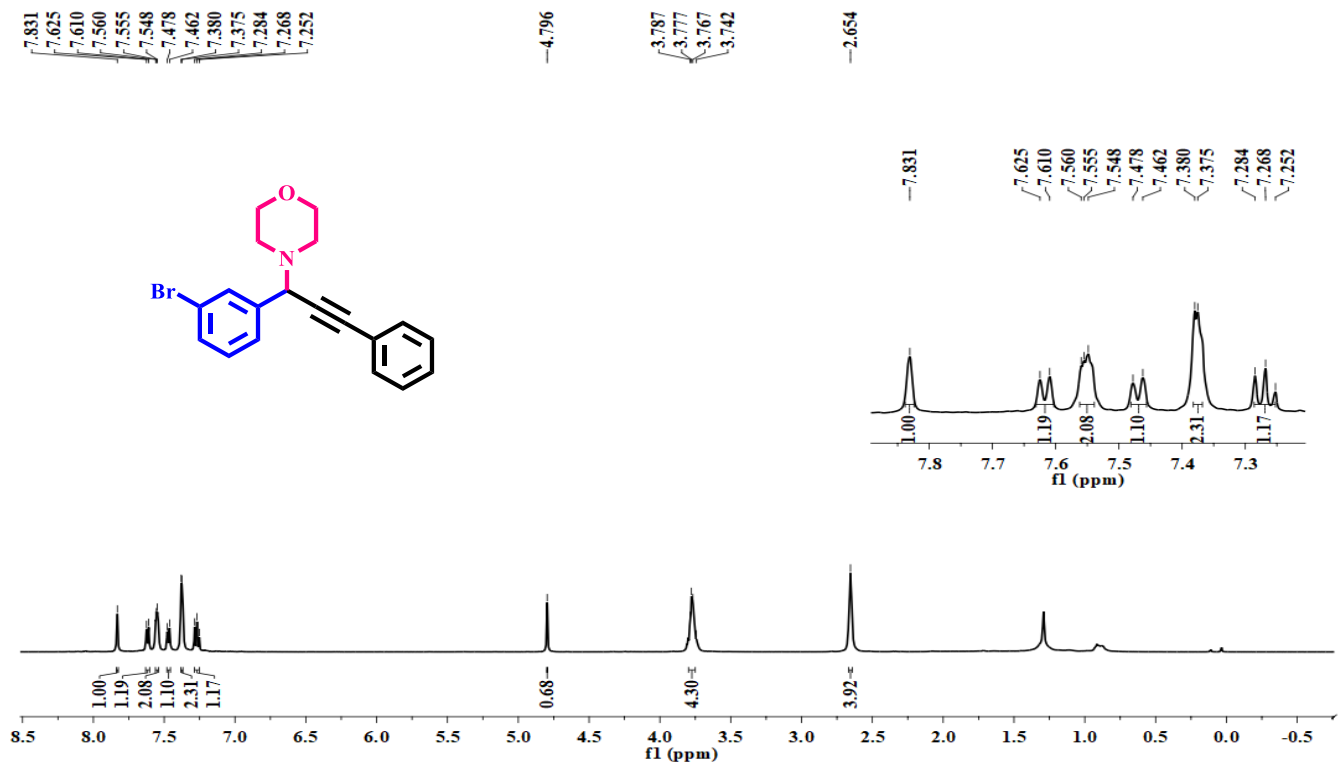

Figure S126: <sup>1</sup>H NMR spectrum of 9ai taking CDCl<sub>3</sub> as solvent.

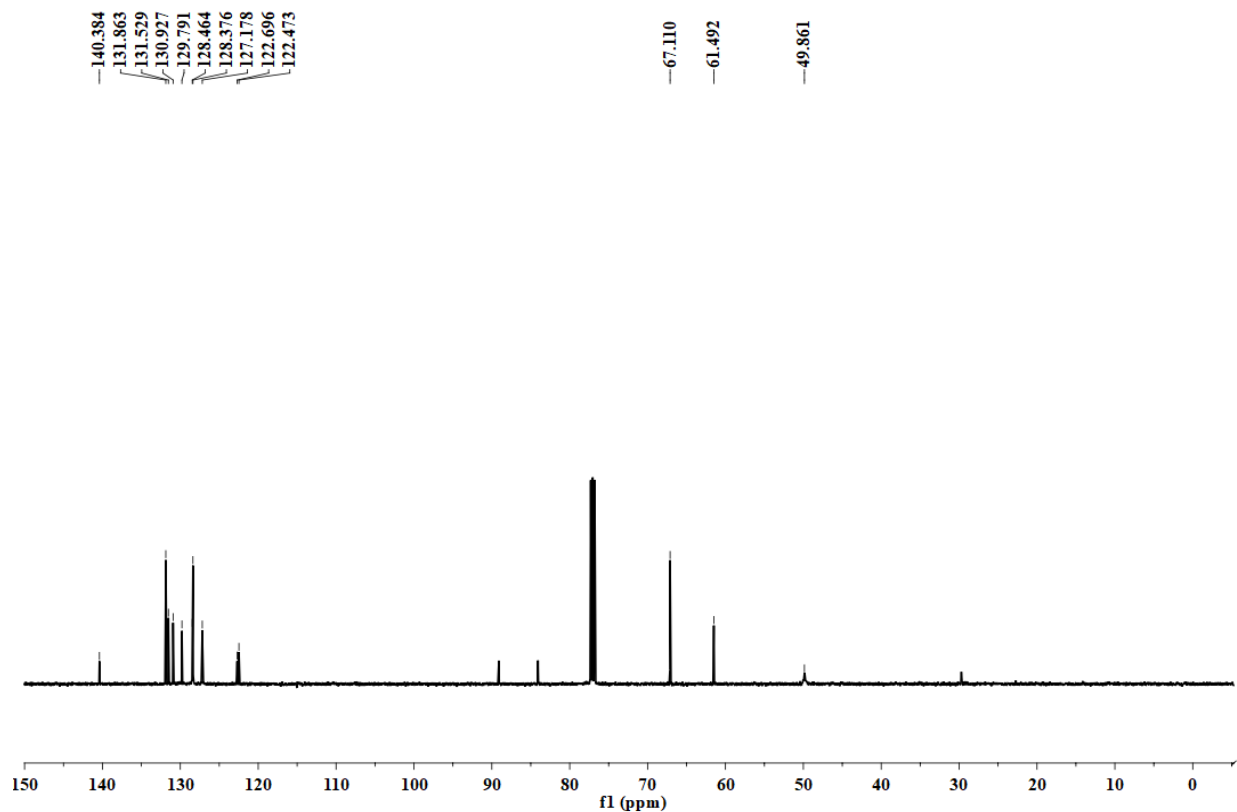

Figure S127: <sup>13</sup>C NMR spectrum of 9ai taking CDCl<sub>3</sub> as solvent.

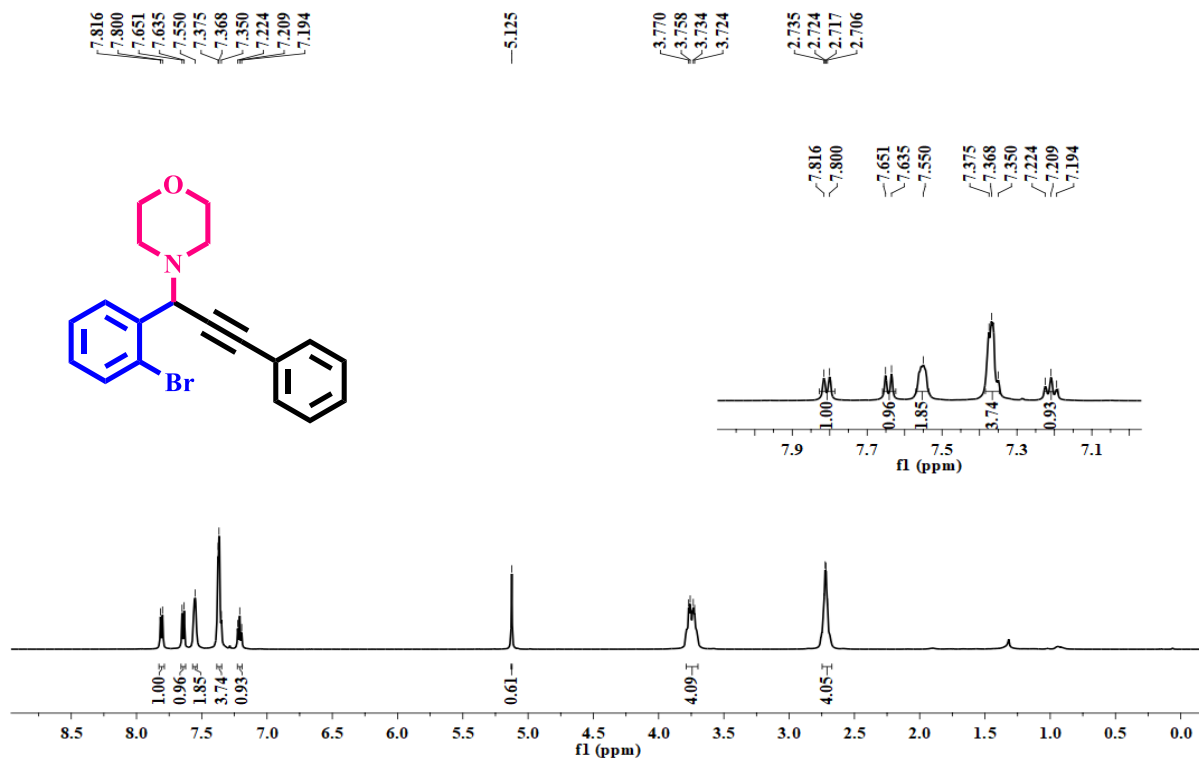

Figure S128: <sup>1</sup>H NMR spectrum of 9aj taking CDCl<sub>3</sub> as solvent.

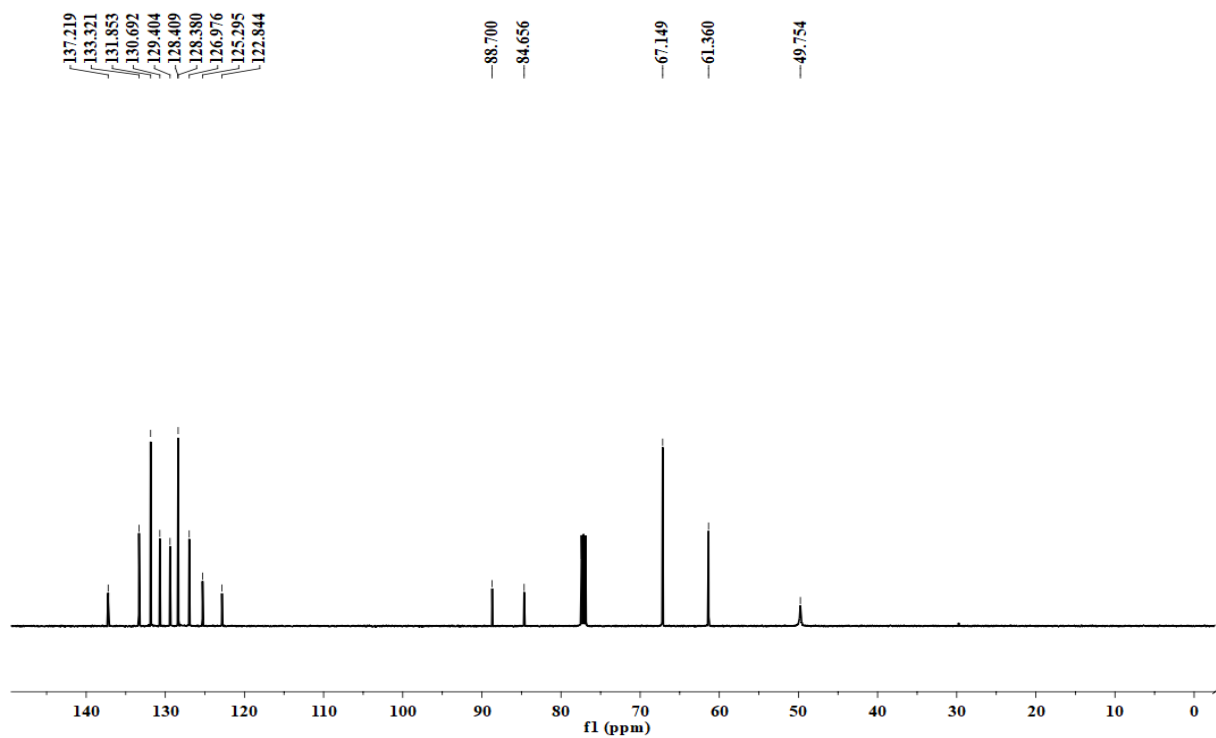

Figure S129: <sup>13</sup>C NMR spectrum of 9aj taking CDCl<sub>3</sub> as solvent.



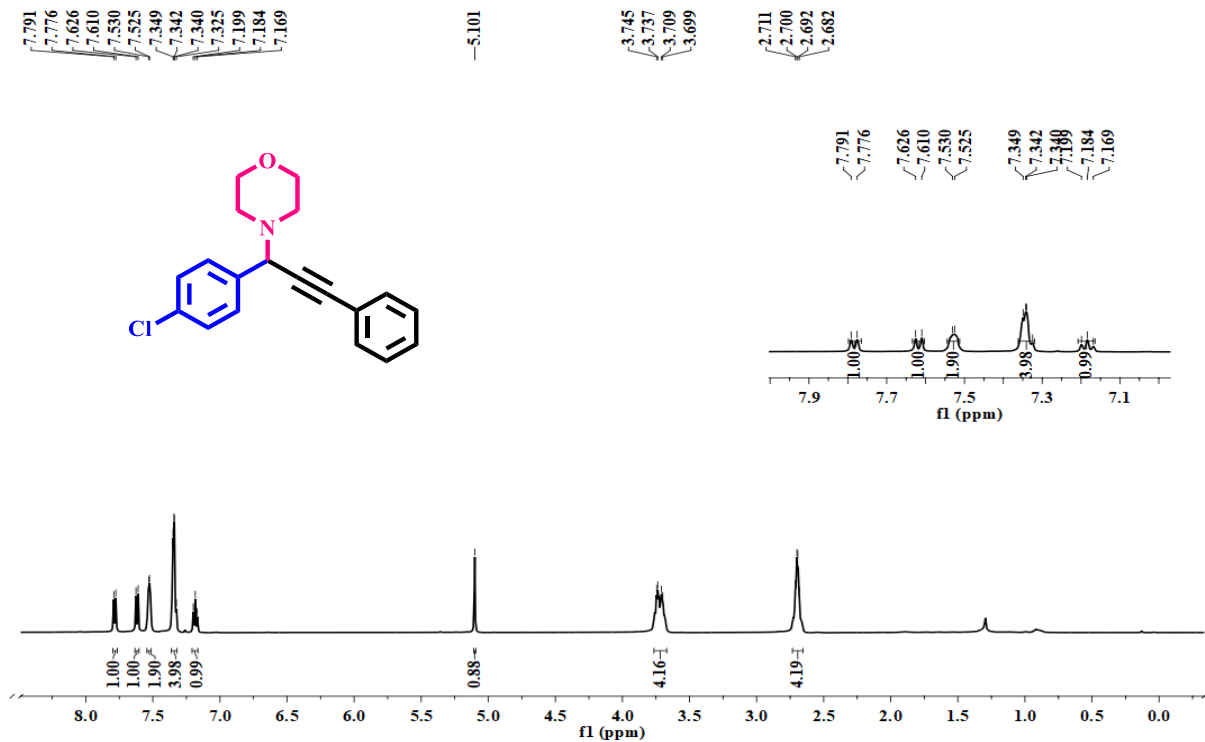

Figure S130: <sup>1</sup>H NMR spectrum of 9ak taking CDCl<sub>3</sub> as solvent.

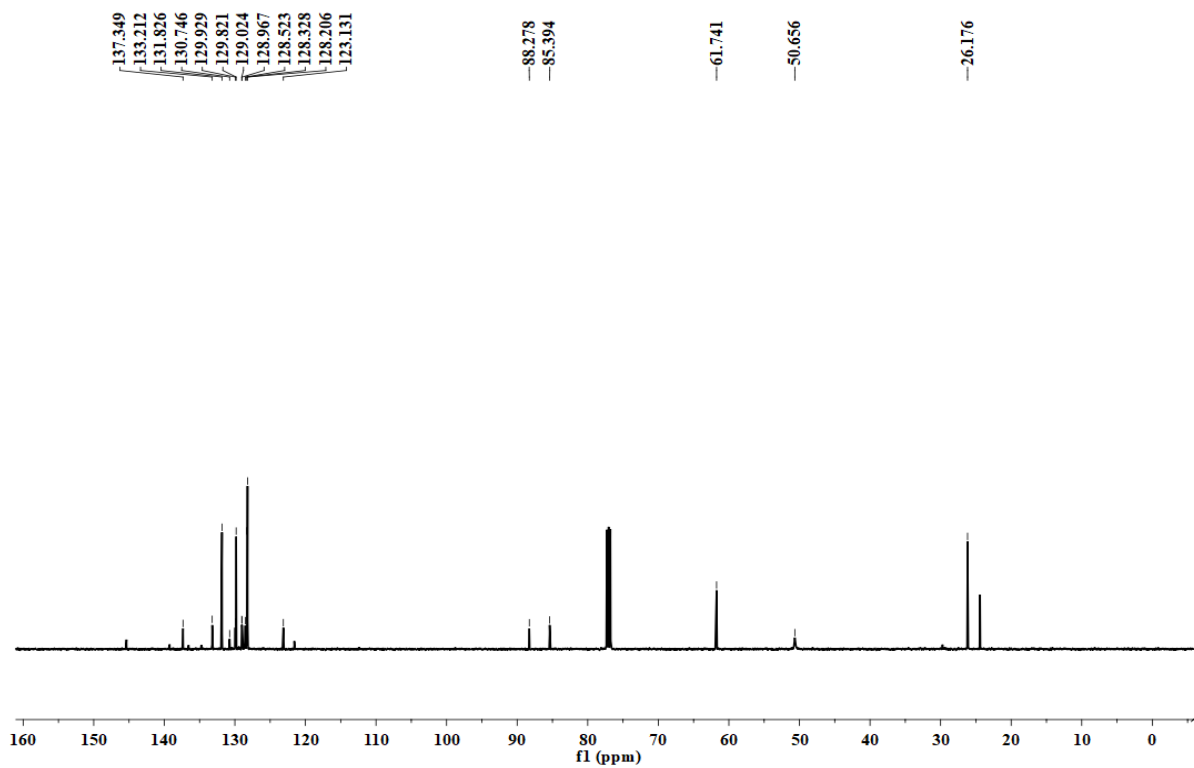

Figure S131: <sup>13</sup>C NMR spectrum of 9ak taking CDCl<sub>3</sub> as solvent.

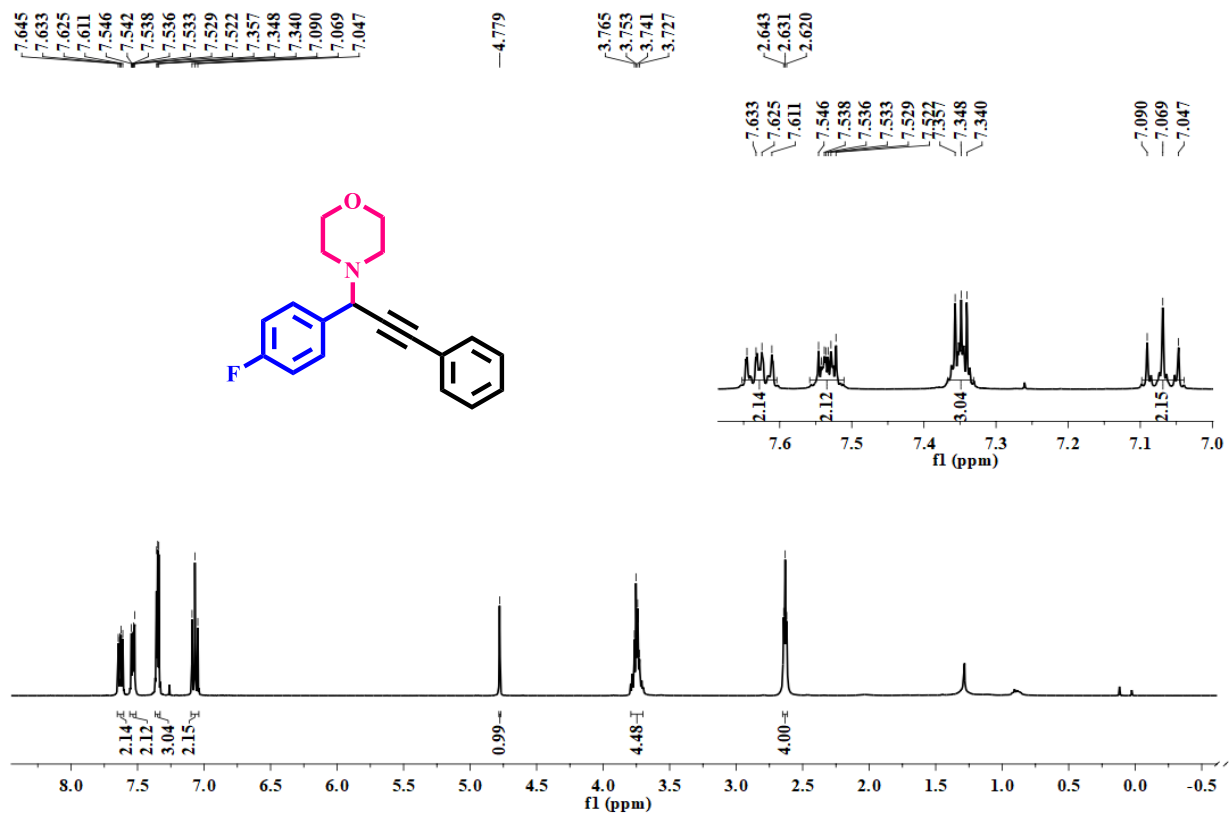

Figure S132: <sup>1</sup>H NMR spectrum of 9al taking CDCl<sub>3</sub> as solvent.

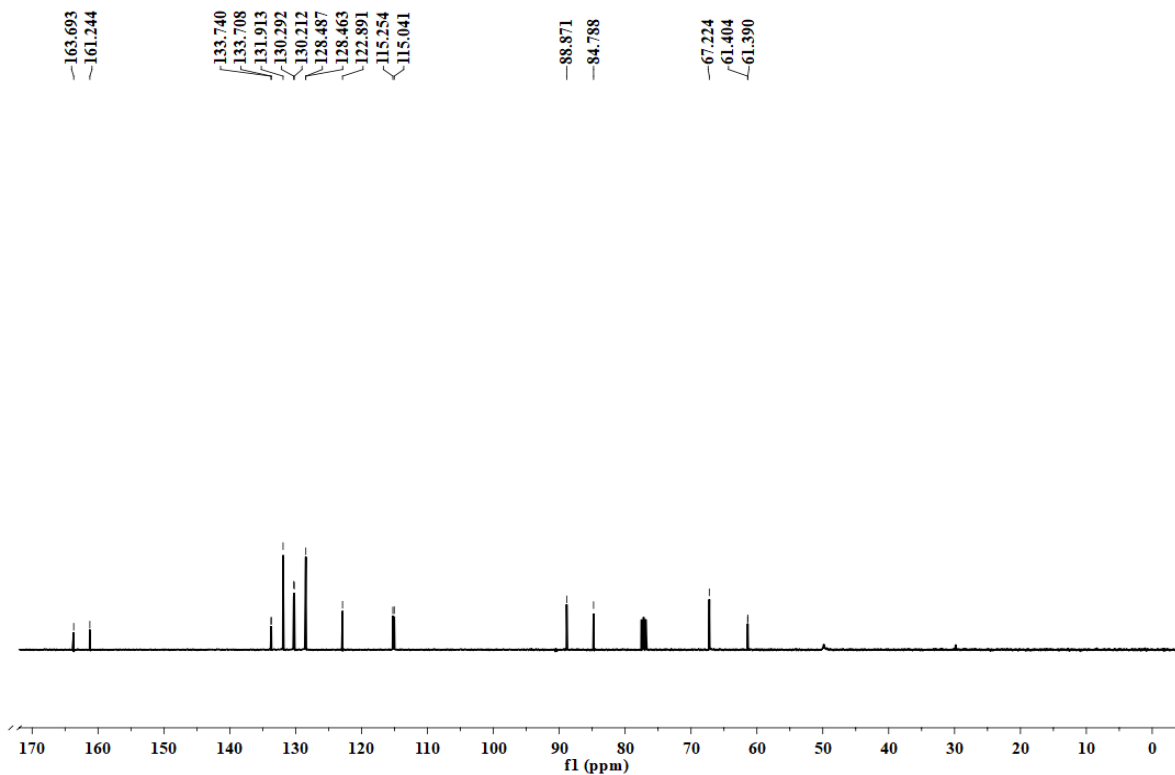

Figure S133: <sup>13</sup>C NMR spectrum of 9al taking CDCl<sub>3</sub> as solvent.

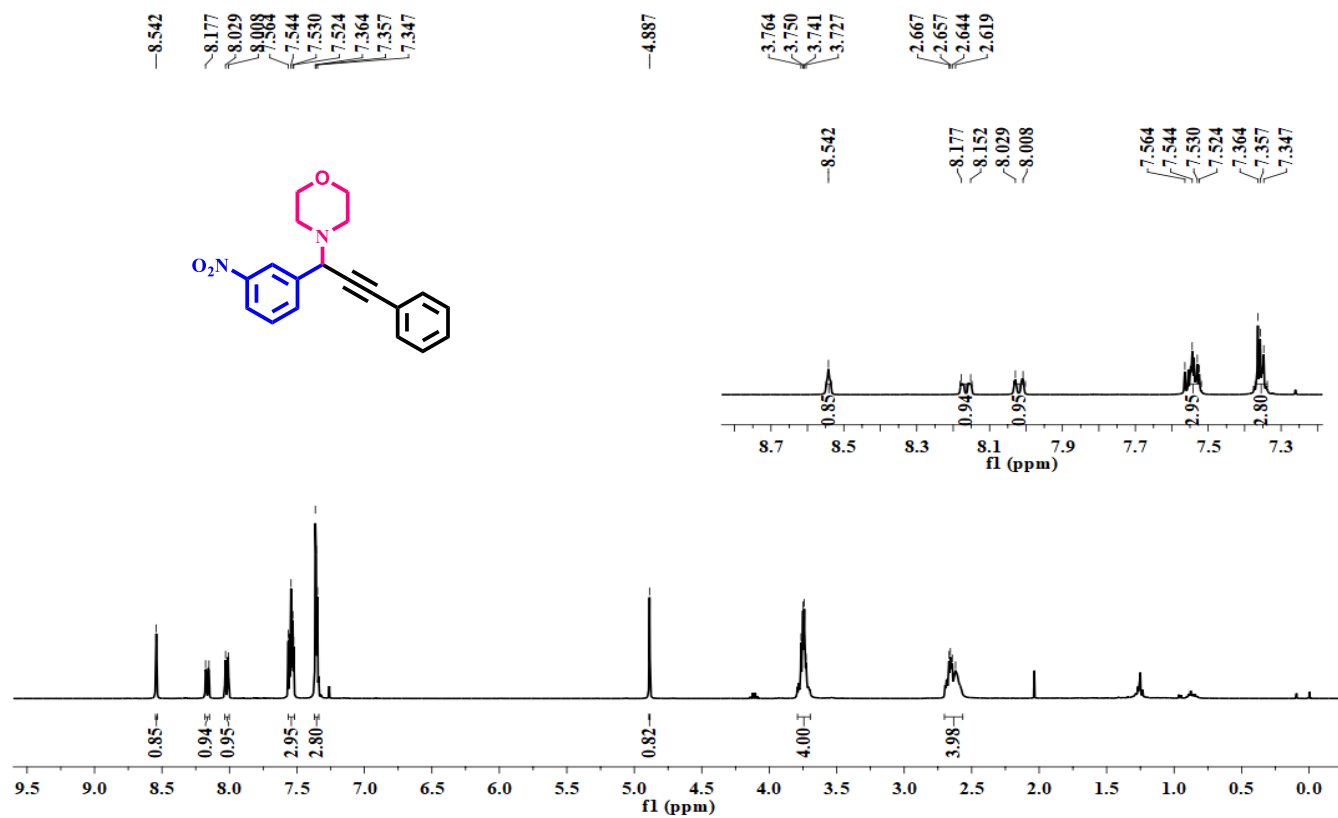

Figure S134: <sup>1</sup>H NMR spectrum of 9am taking CDCl<sub>3</sub> as solvent.

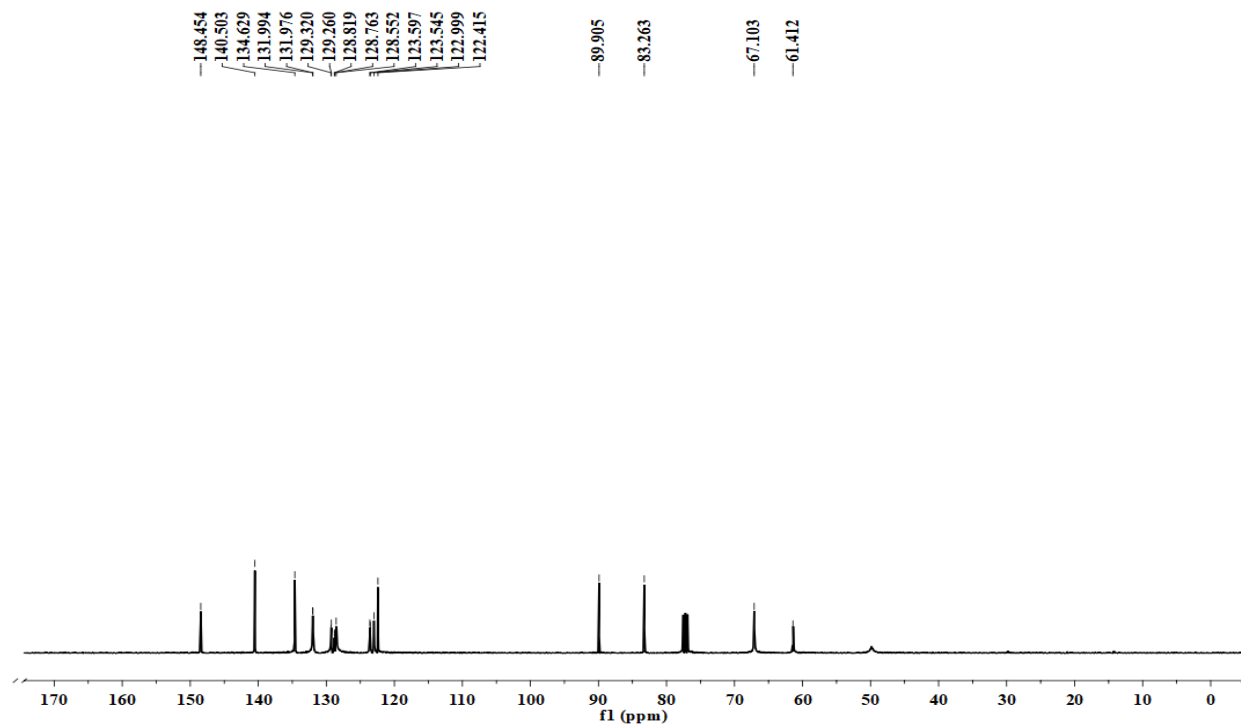

Figure S135: <sup>13</sup>C NMR spectrum of 9am taking CDCl<sub>3</sub> as solvent.

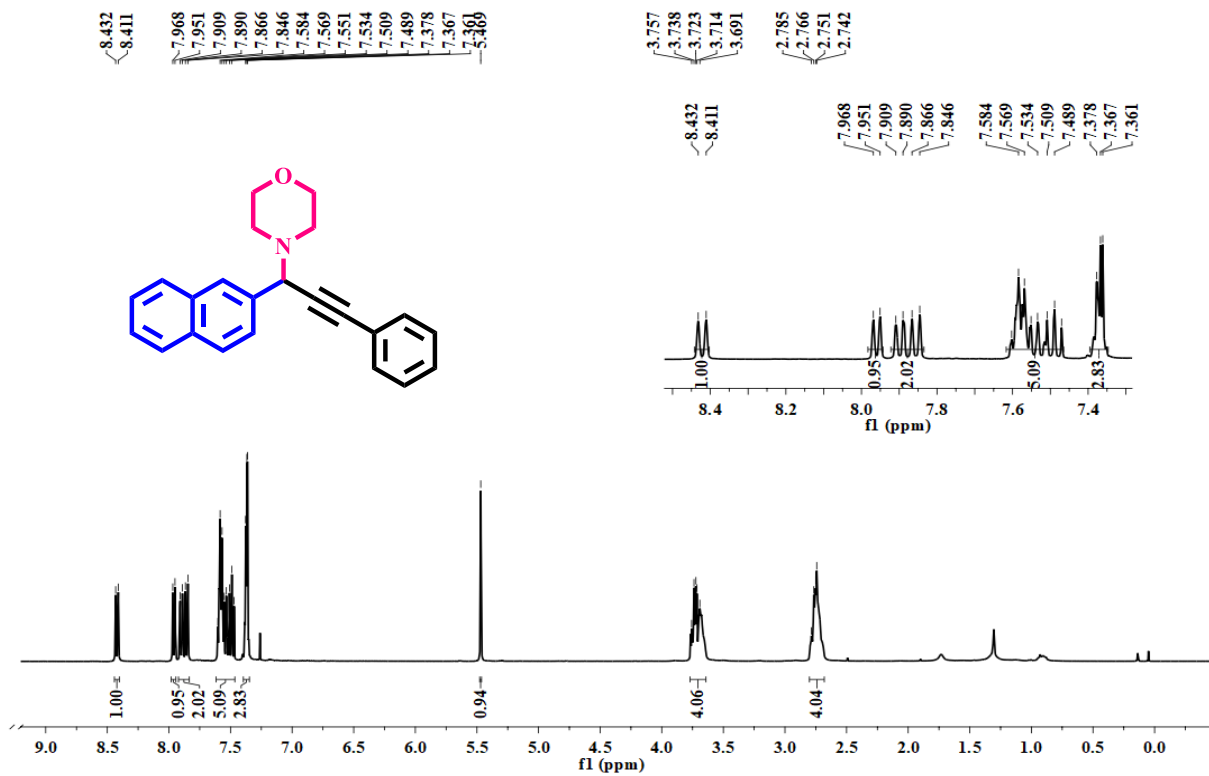

Figure S136: <sup>1</sup>H NMR spectrum of 9an taking CDCl<sub>3</sub> as solvent.

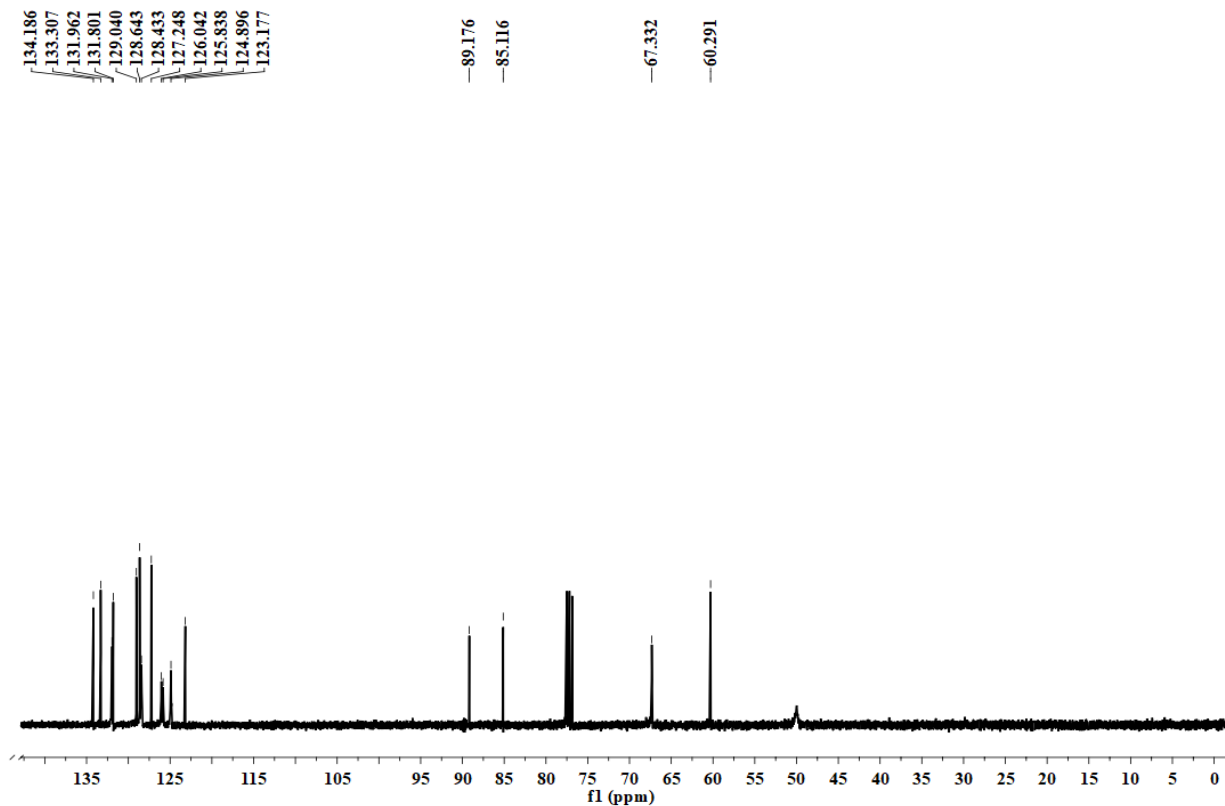

Figure S137: <sup>13</sup>C NMR spectrum of 9an taking CDCl<sub>3</sub> as solvent.

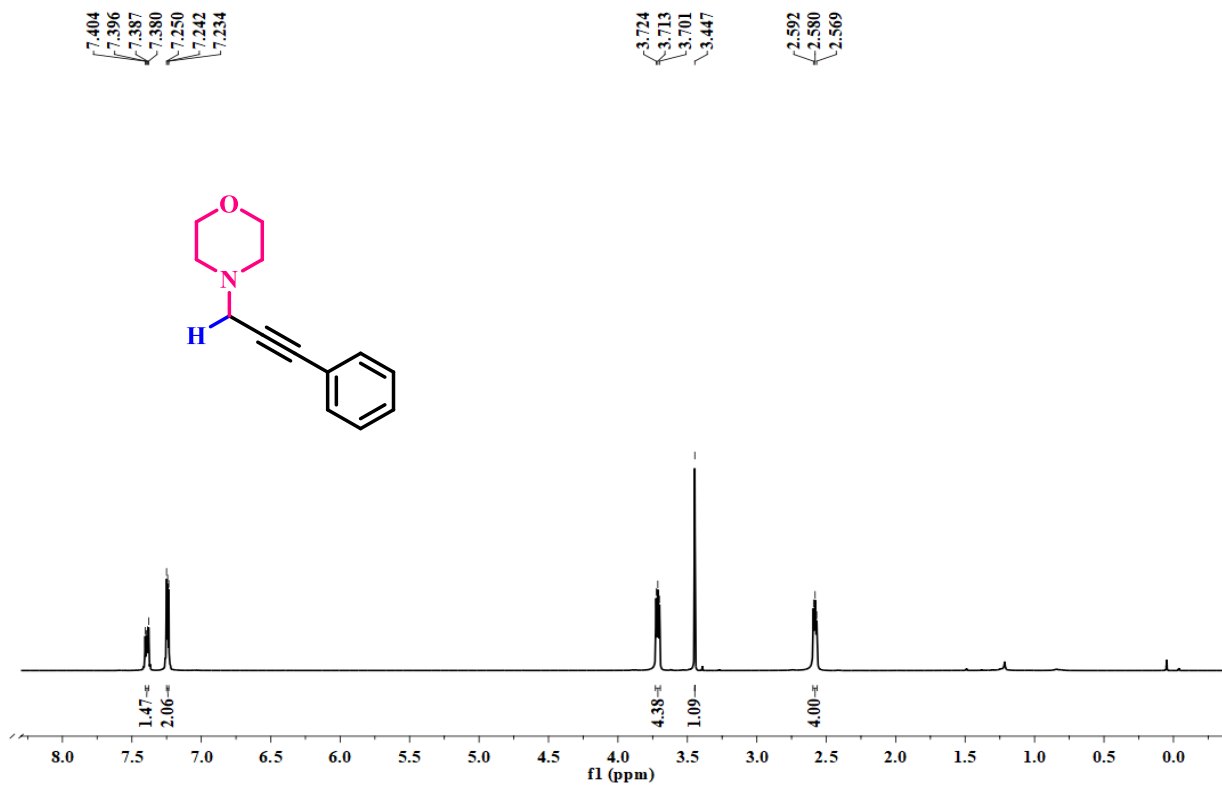

Figure S138: <sup>1</sup>H NMR spectrum of 9ao taking CDCl<sub>3</sub> as solvent.

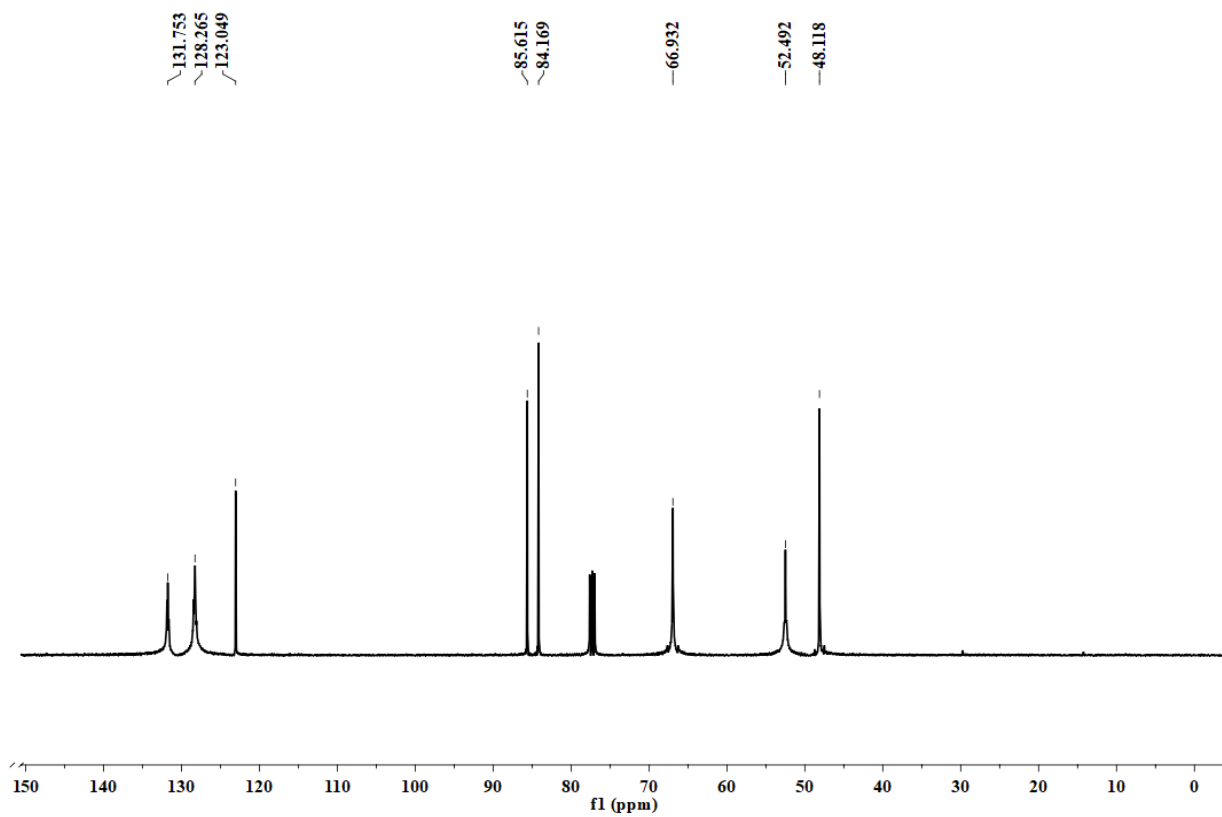

Figure S139: <sup>13</sup>C NMR spectrum of 9ao taking CDCl<sub>3</sub> as solvent.

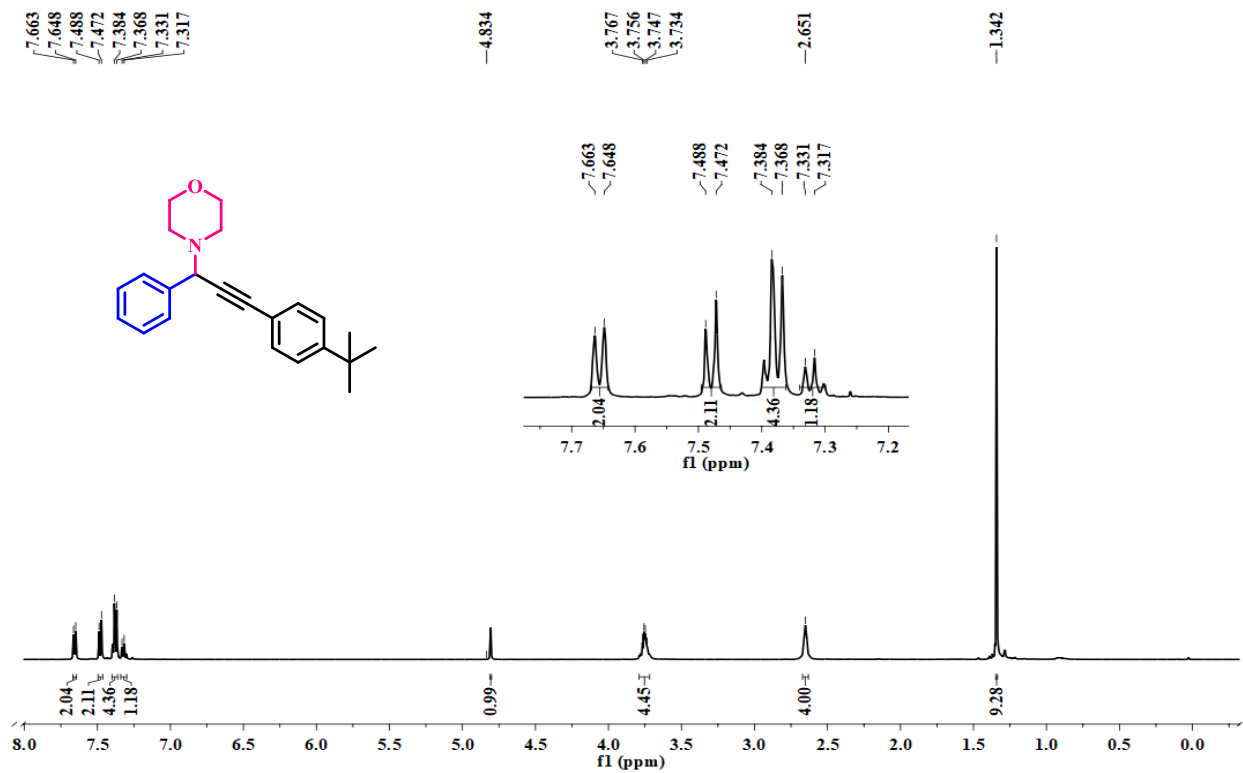

Figure S140: <sup>1</sup>H NMR spectrum of 10a taking CDCl<sub>3</sub> as solvent.

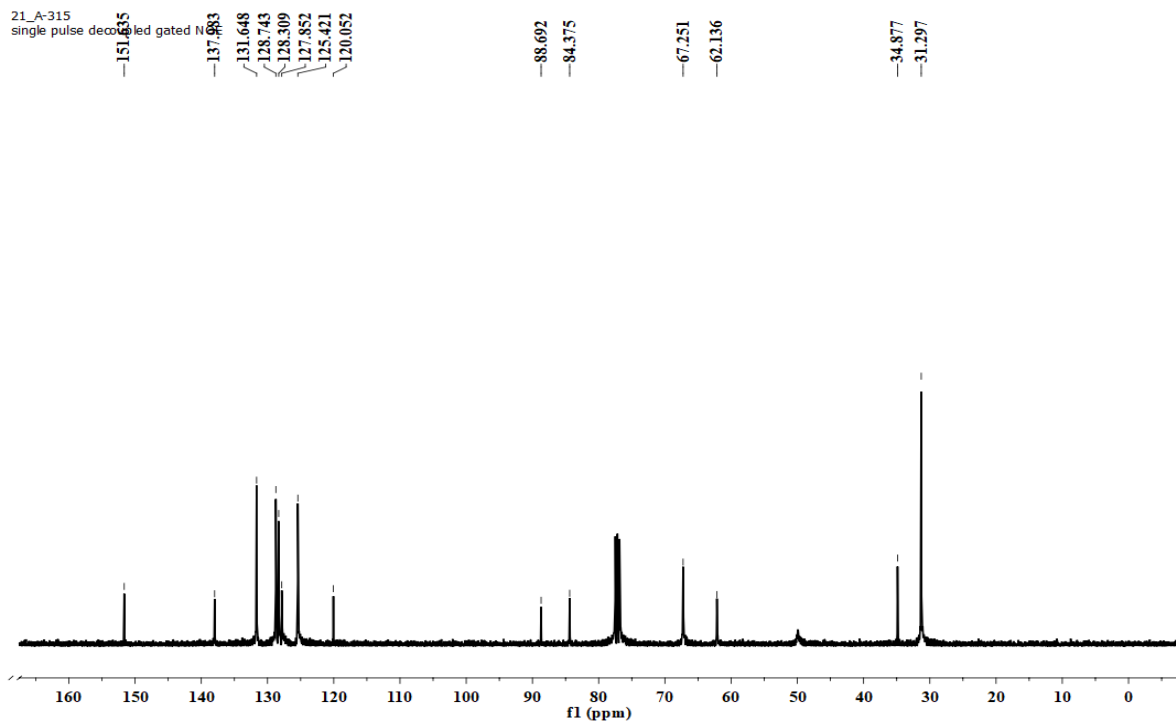

Figure S141: <sup>13</sup>C NMR spectrum of 10a taking CDCl<sub>3</sub> as solvent.

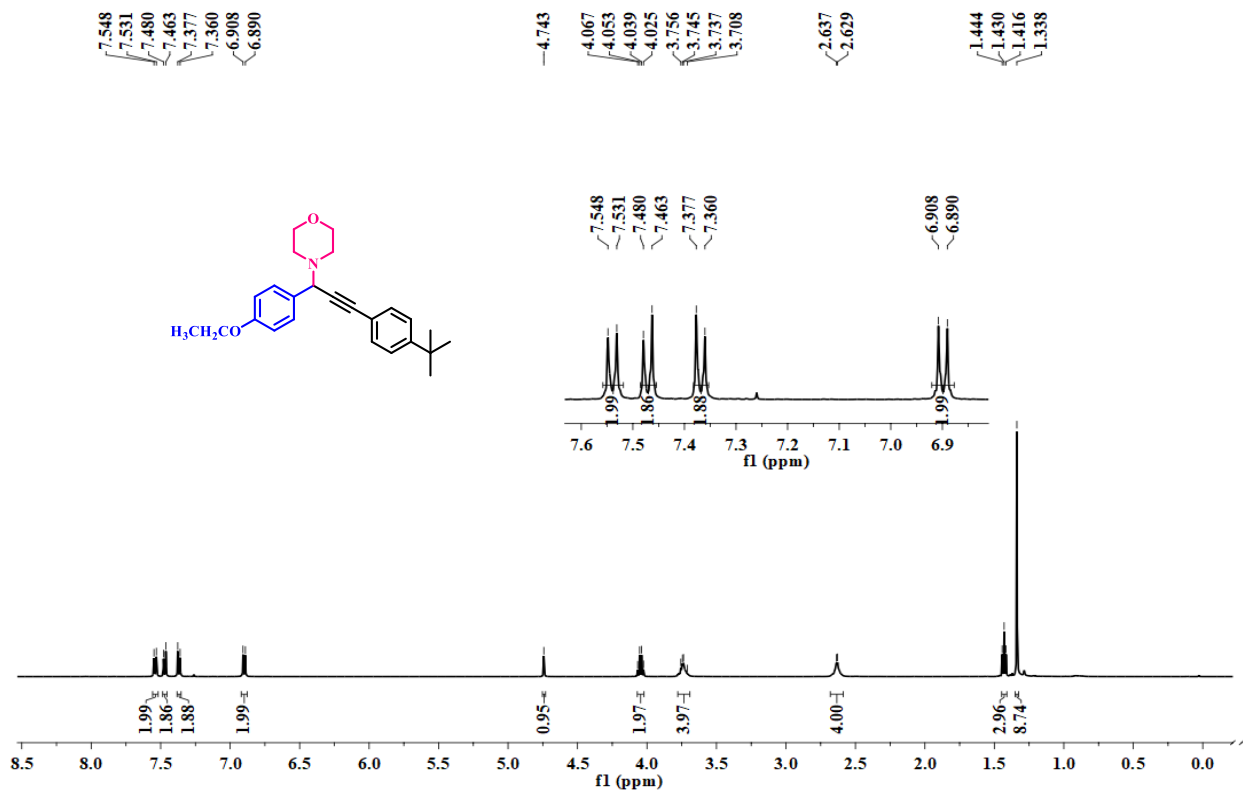

Figure S142: <sup>1</sup>H NMR spectrum of 10ab taking CDCl<sub>3</sub> as solvent.

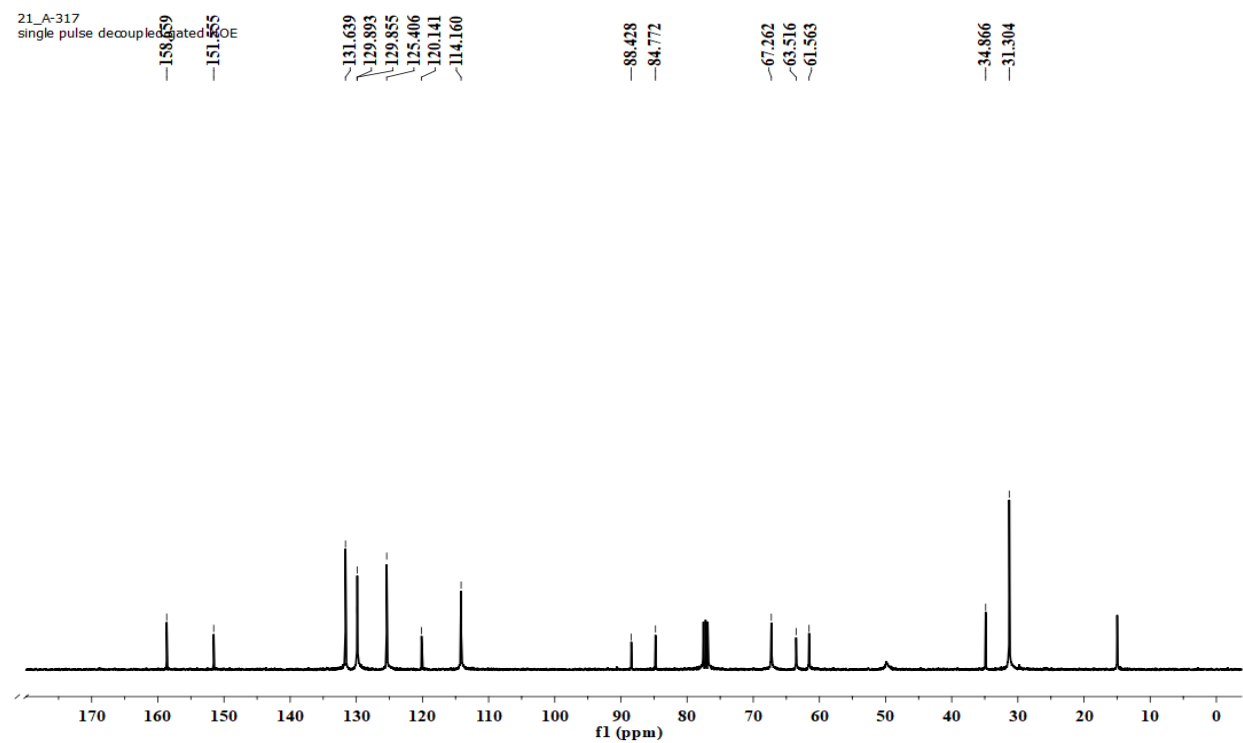

Figure S143: <sup>13</sup>C NMR spectrum of 10ab taking CDCl<sub>3</sub> as solvent.

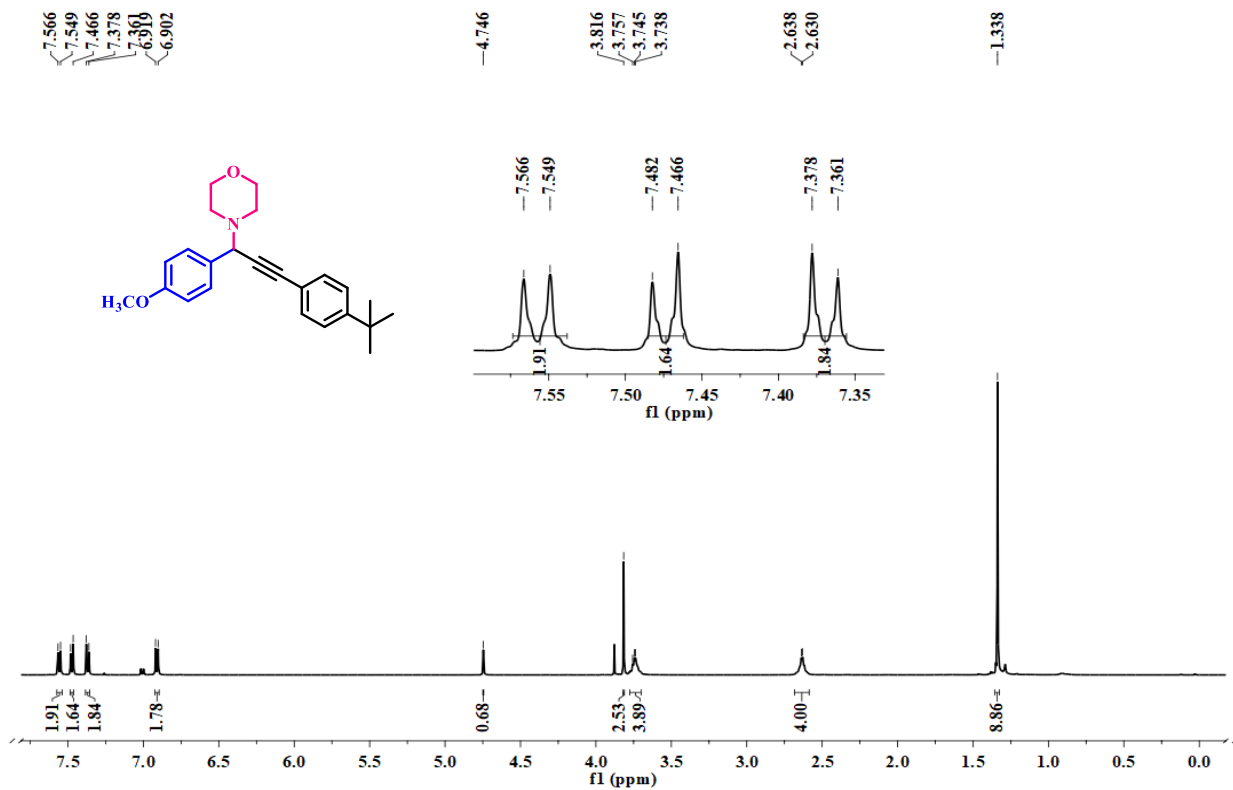

Figure S144: <sup>1</sup>H NMR spectrum of 10ac taking CDCl<sub>3</sub> as solvent.

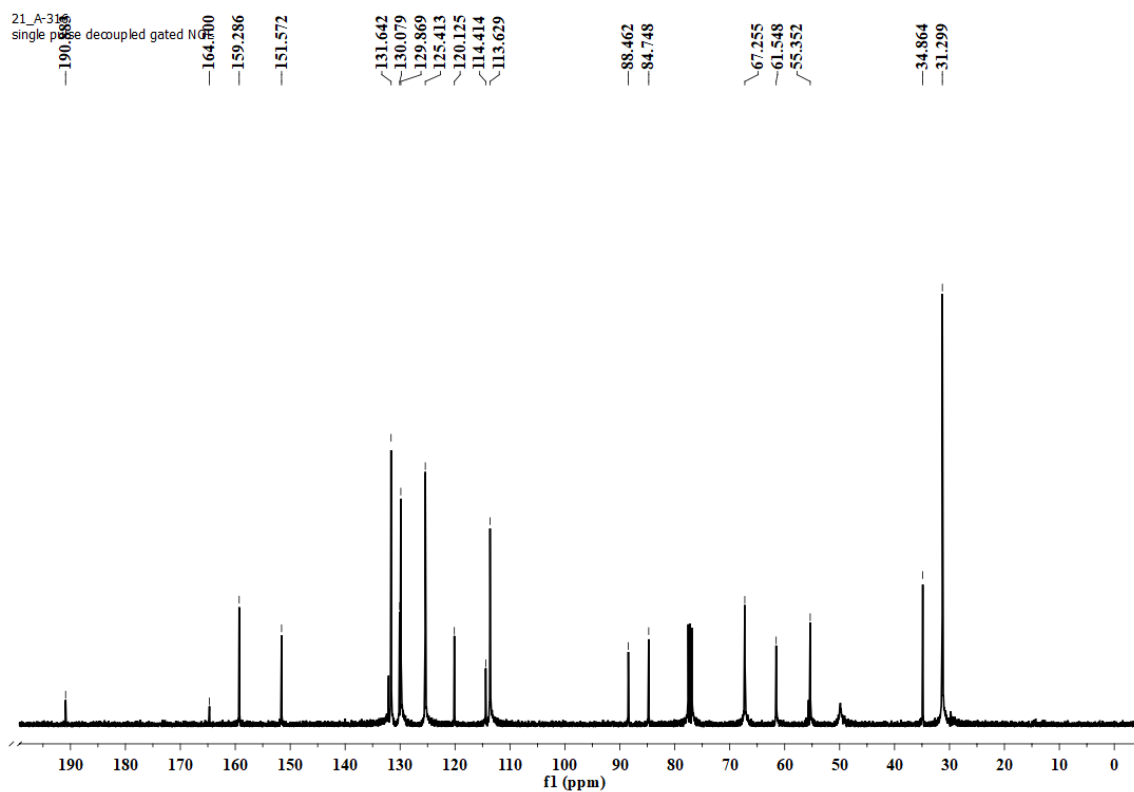

Figure S145: <sup>13</sup>C NMR spectrum of 10ac taking CDCl<sub>3</sub> as solvent.



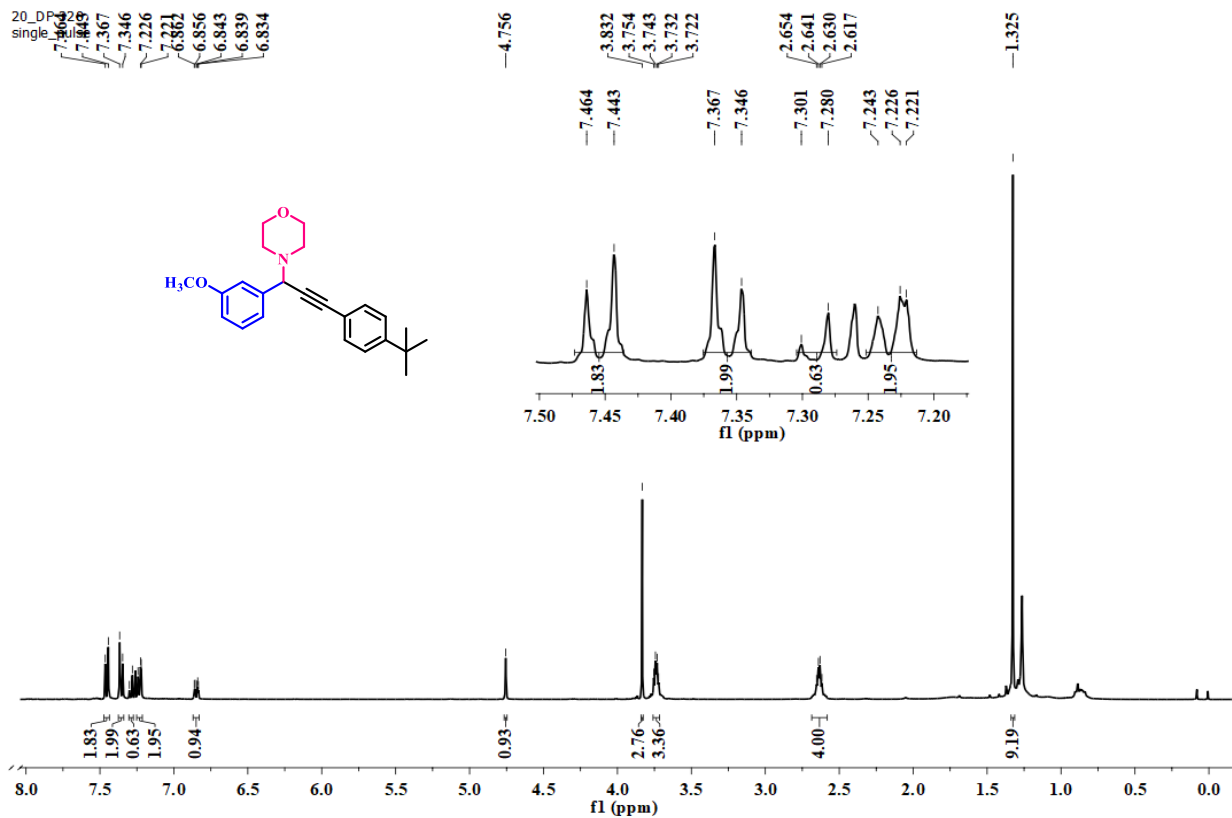

Figure S146:  $^1\text{H}$  NMR spectrum of 10ad taking  $\text{CDCl}_3$  as solvent.

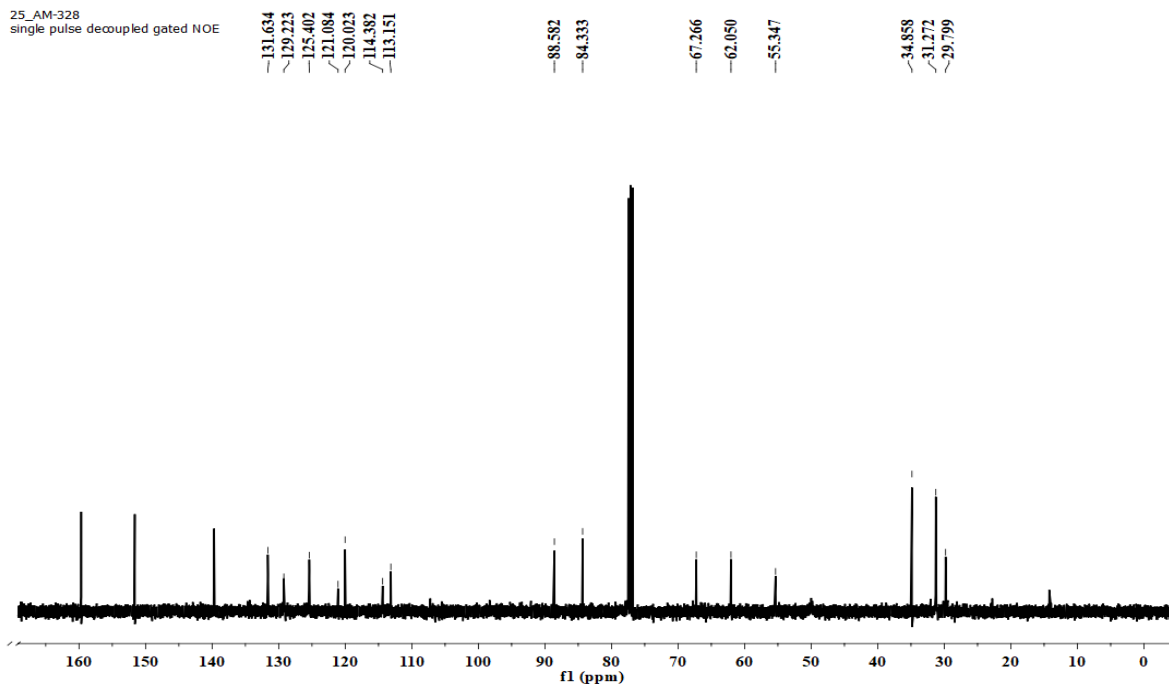

Figure S147:  $^{13}\text{C}$  NMR spectrum of 10ad taking  $\text{CDCl}_3$  as solvent.

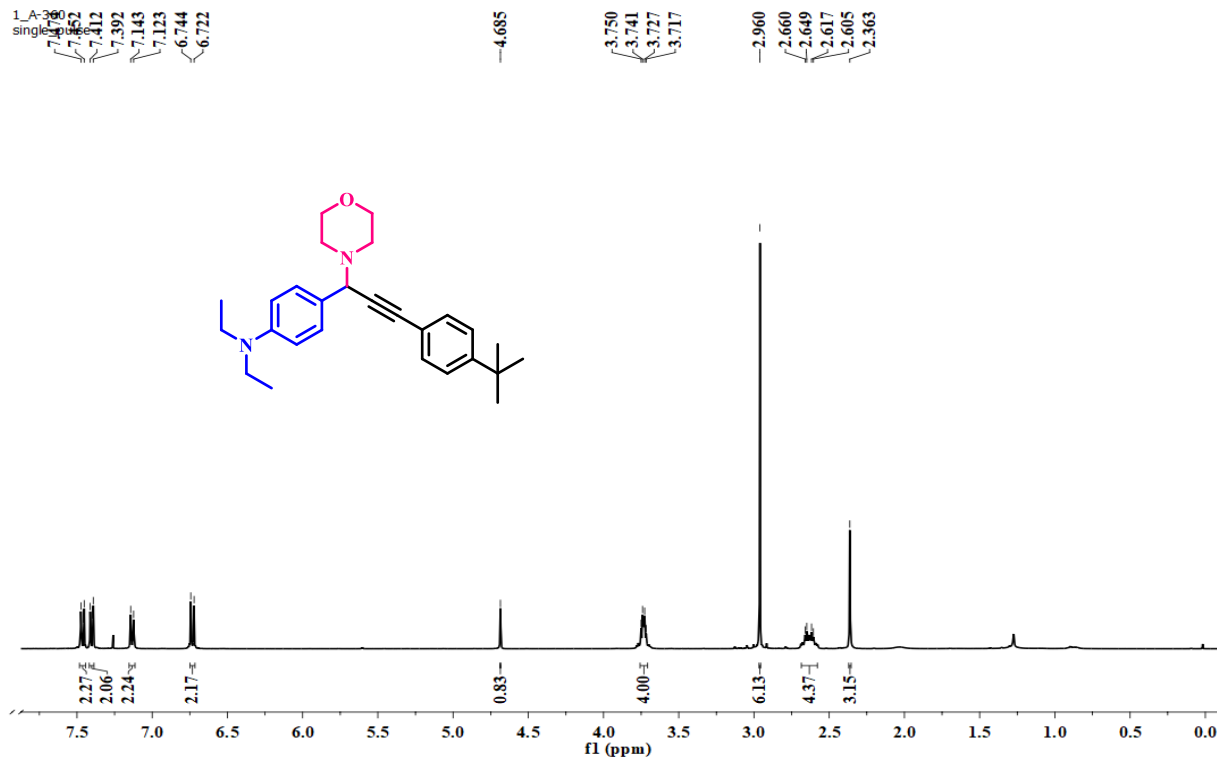

Figure S148:  $^1\text{H}$  NMR spectrum of 10ae taking  $\text{CDCl}_3$  as solvent.

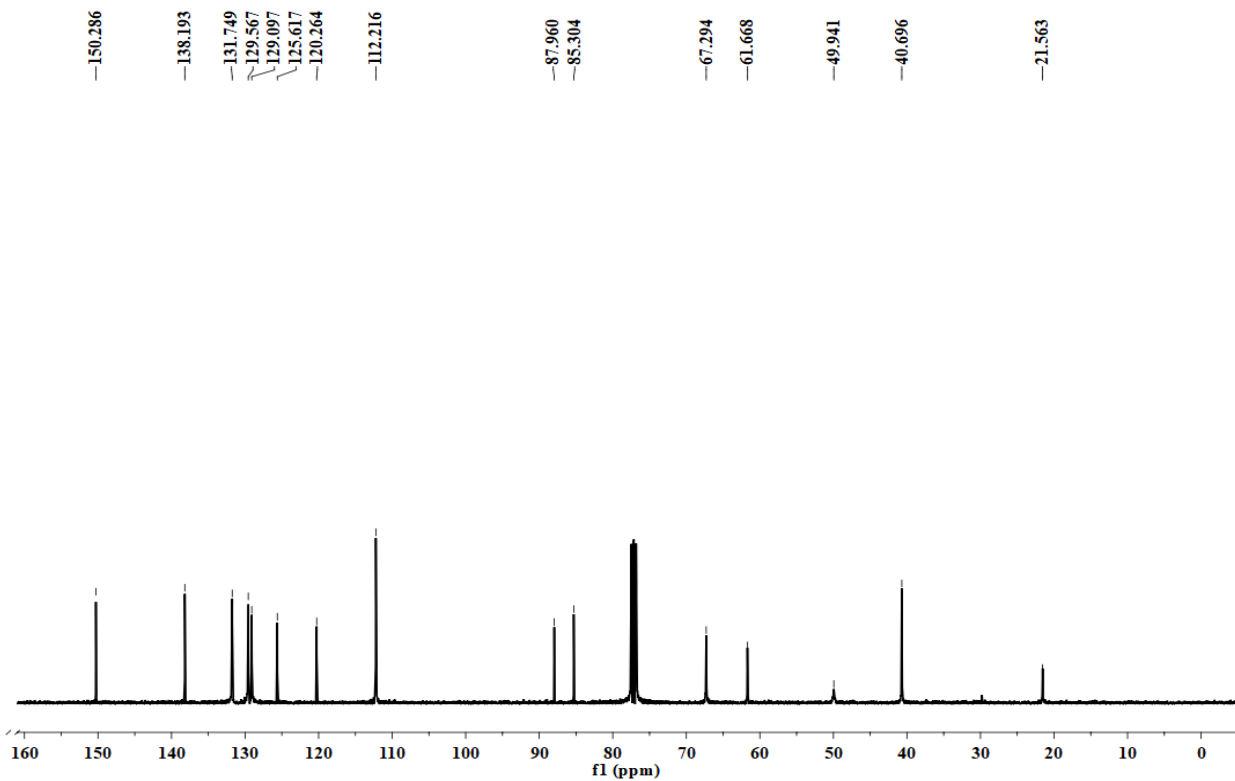

Figure S149:  $^{13}\text{C}$  NMR spectrum of 10ae taking  $\text{CDCl}_3$  as solvent.

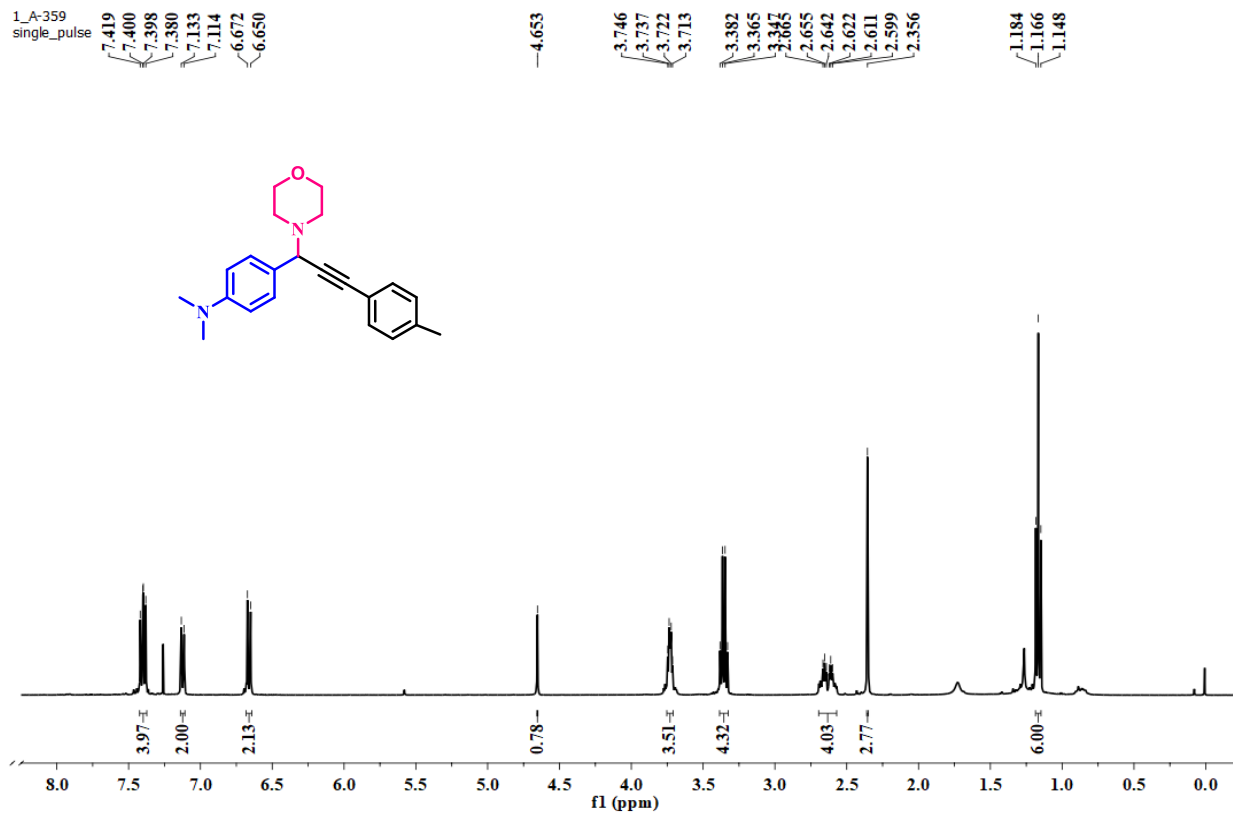

Figure S150:  $^1\text{H}$  NMR spectrum of 10af taking  $\text{CDCl}_3$  as solvent.

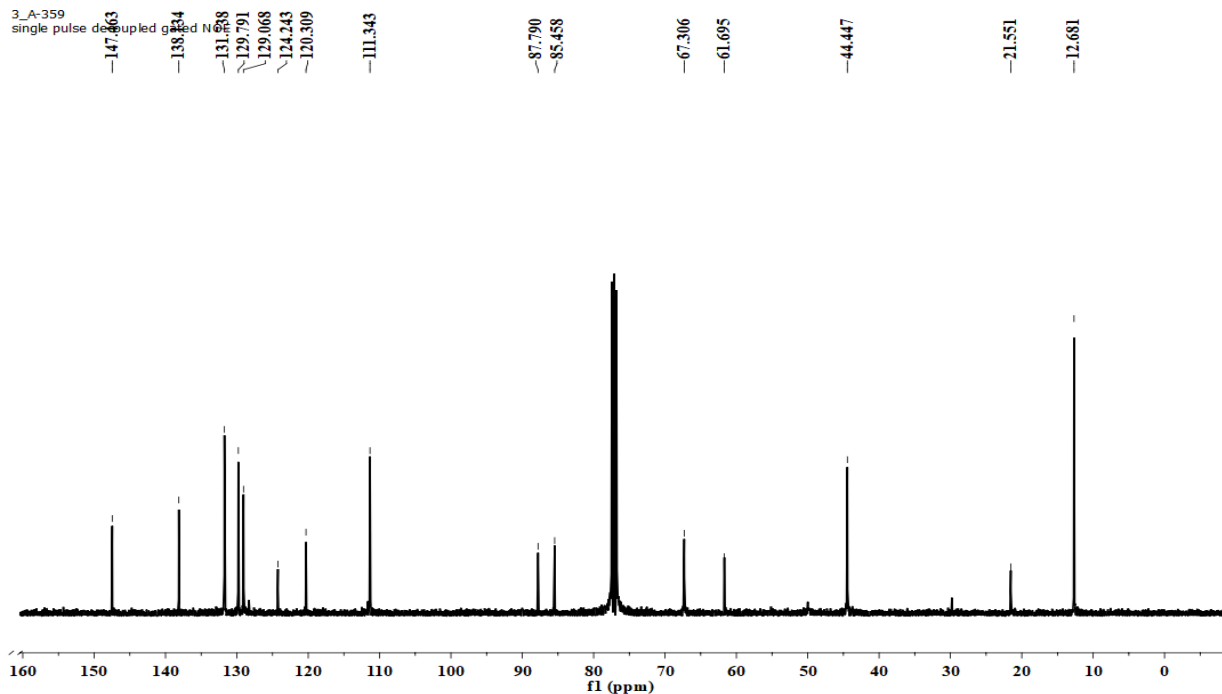

Figure S151:  $^{13}\text{C}$  NMR spectrum of 10af taking  $\text{CDCl}_3$  as solvent.

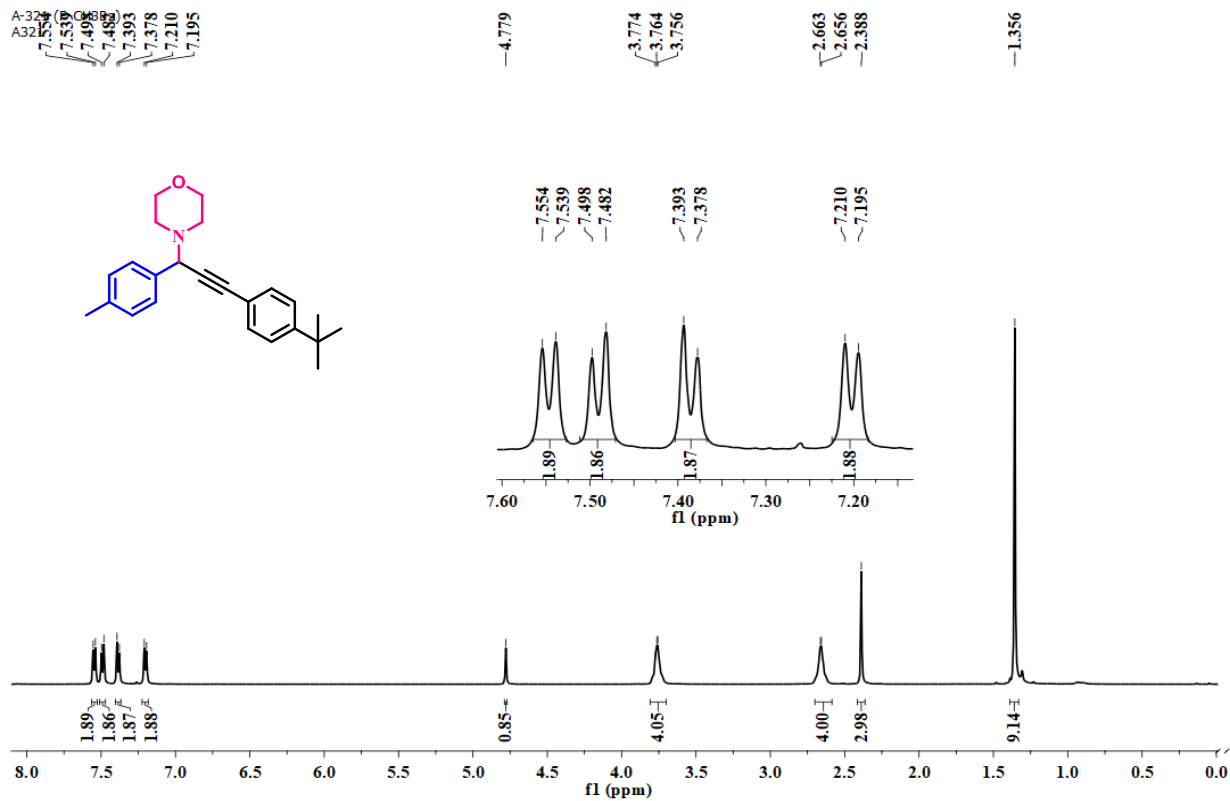

Figure S152: <sup>1</sup>H NMR spectrum of 10ag taking CDCl<sub>3</sub> as solvent.

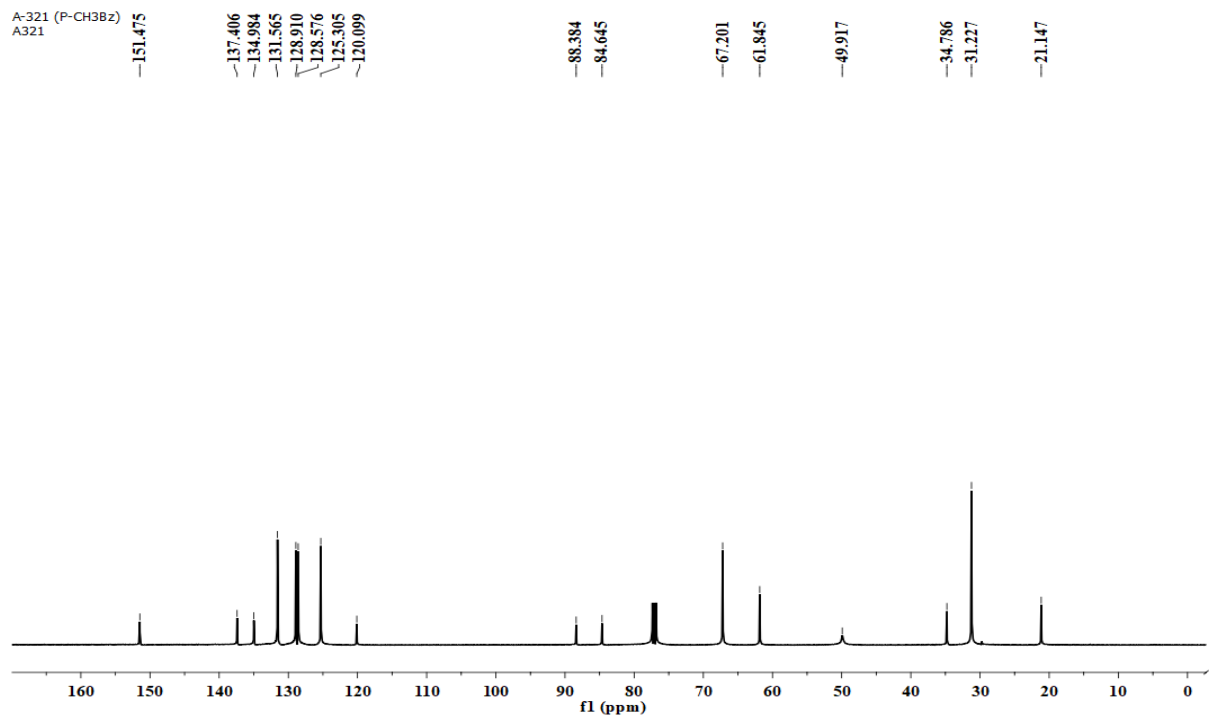

Figure S153: <sup>13</sup>C NMR spectrum of 10ag taking CDCl<sub>3</sub> as solvent.

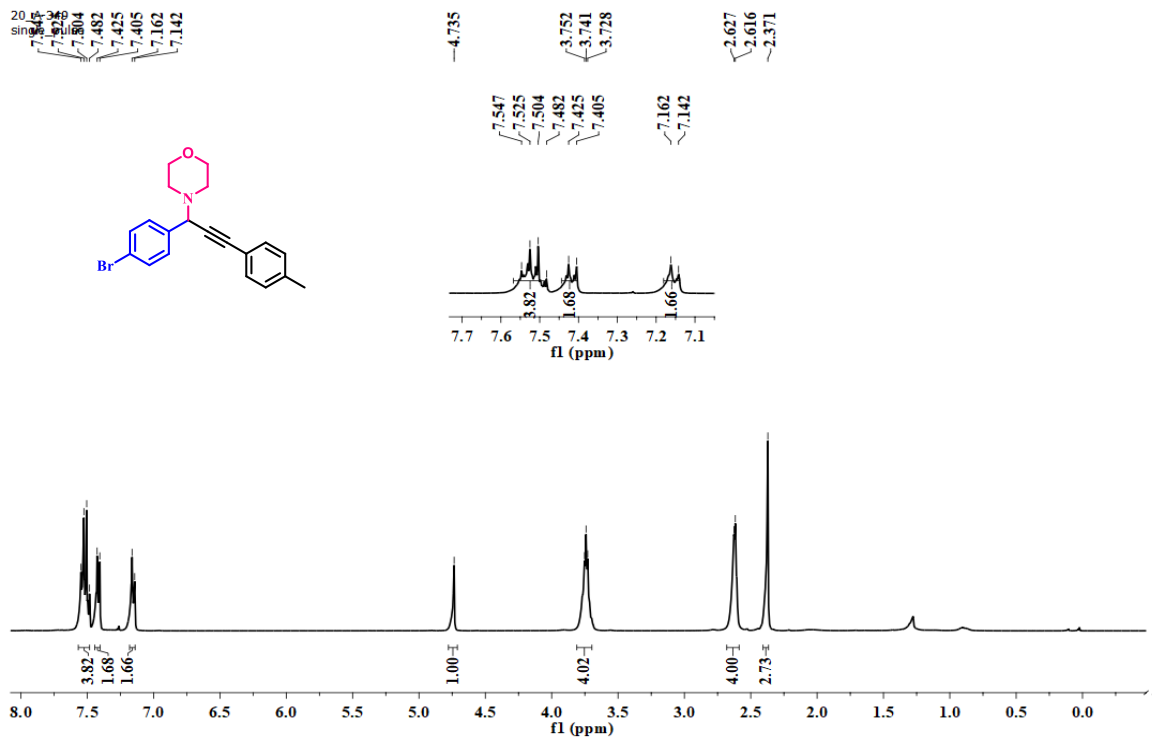

Figure S154: <sup>1</sup>H NMR spectrum of 10ah taking CDCl<sub>3</sub> as solvent.

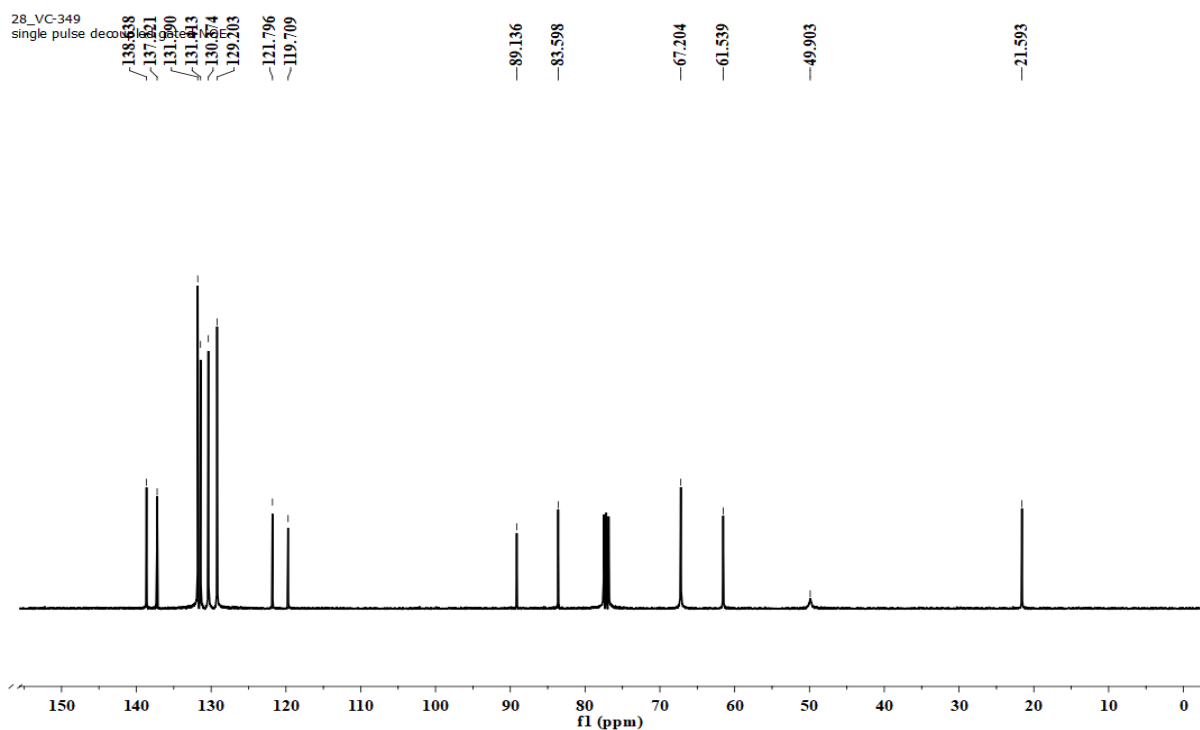

Figure S155: <sup>13</sup>C NMR spectrum of 10ah taking CDCl<sub>3</sub> as solvent.

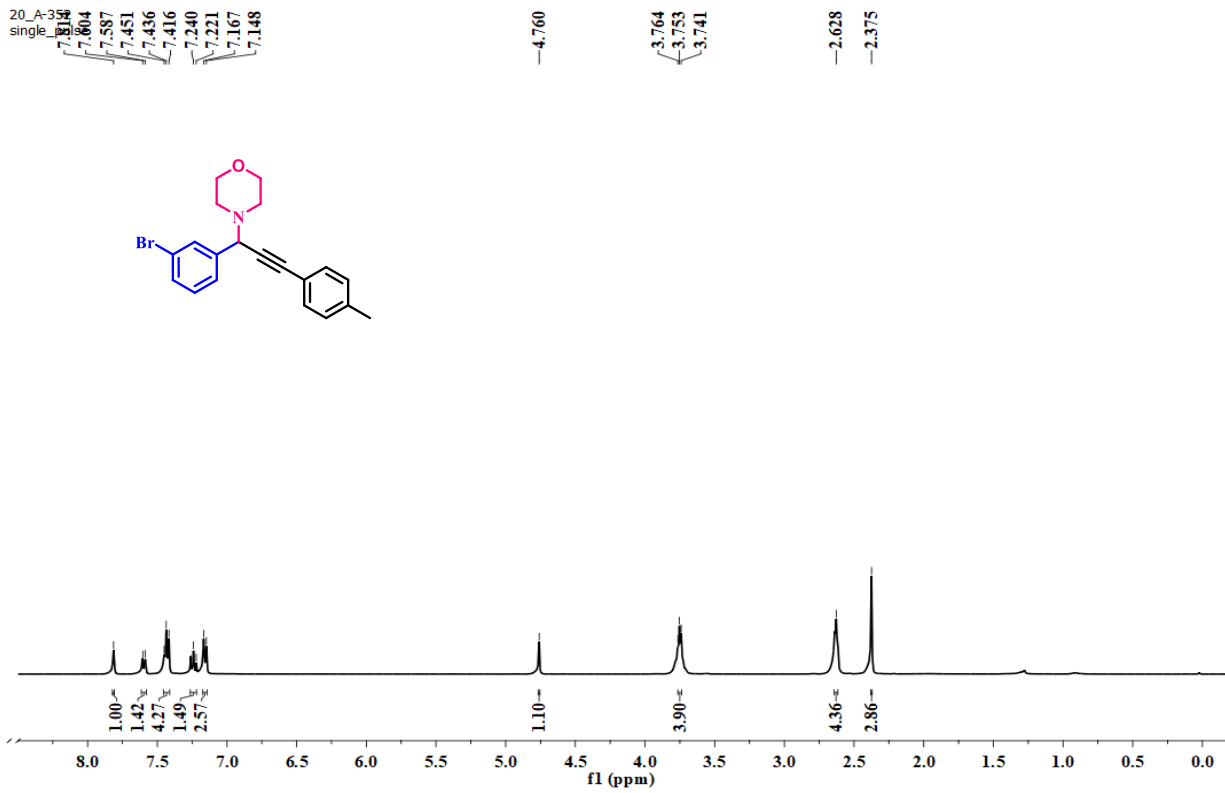

Figure S156:  $^1\text{H}$  NMR spectrum of 10ai taking  $\text{CDCl}_3$  as solvent.

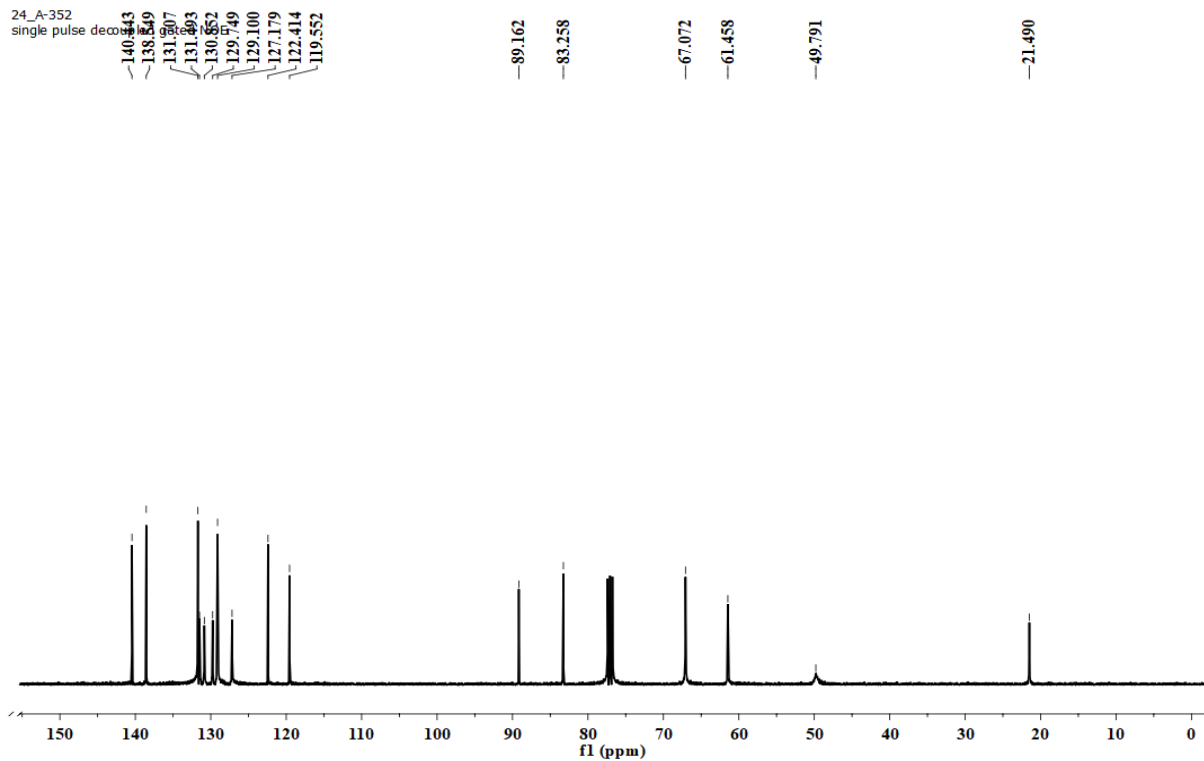

Figure S157:  $^{13}\text{C}$  NMR spectrum of 10ai taking  $\text{CDCl}_3$  as solvent.

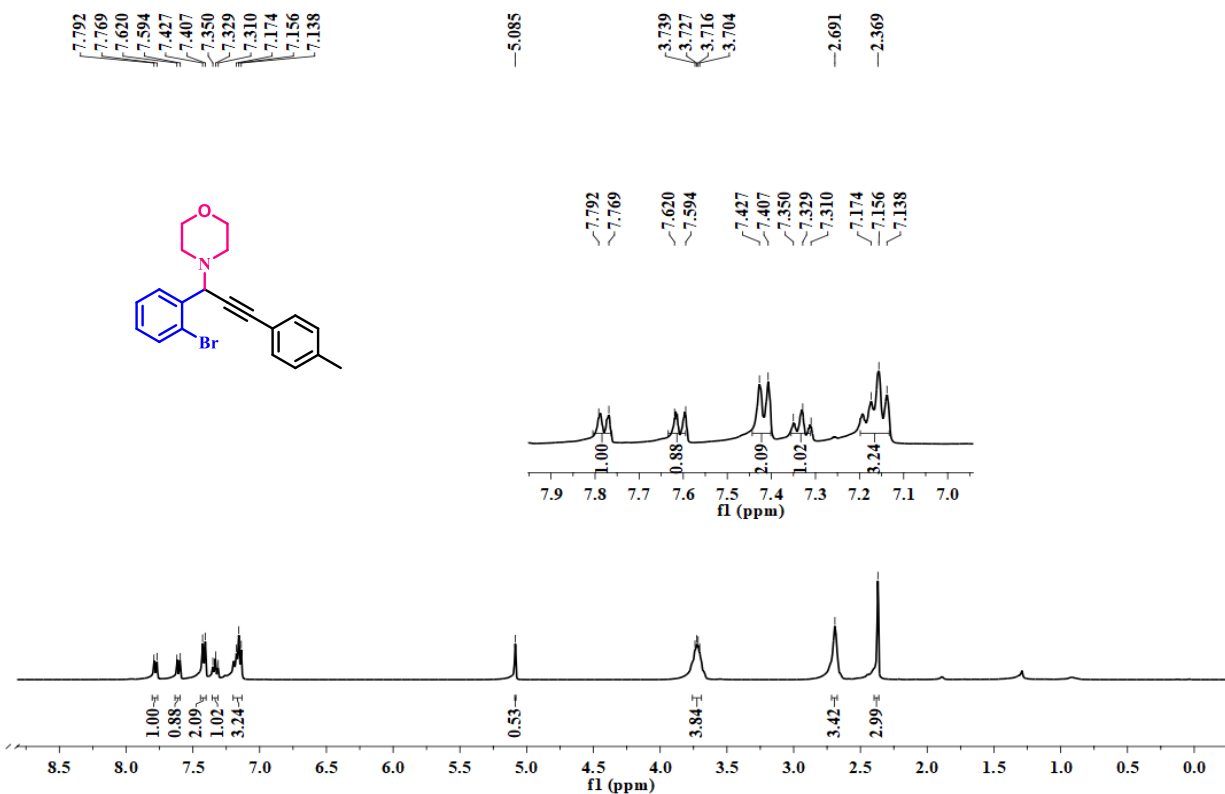

Figure S158: <sup>1</sup>H NMR spectrum of 10aj taking CDCl<sub>3</sub> as solvent.

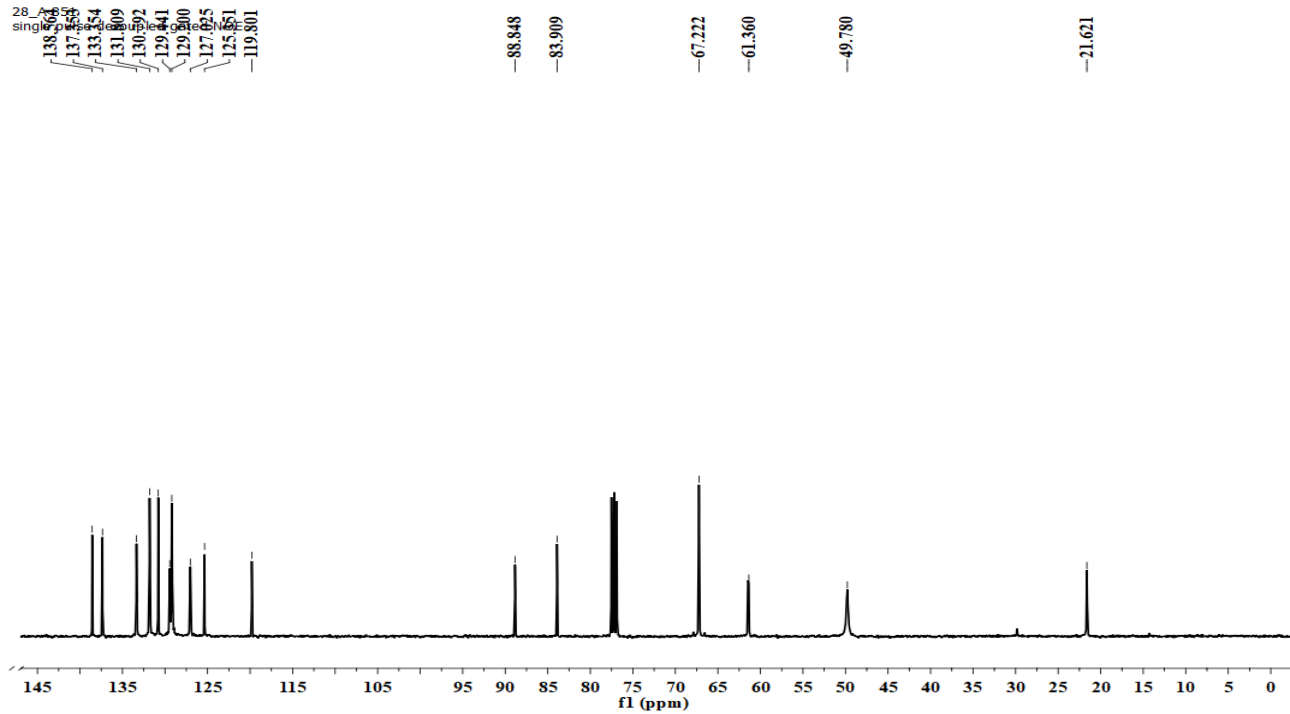

Figure S159: <sup>13</sup>C NMR spectrum of 10aj taking CDCl<sub>3</sub> as solvent.

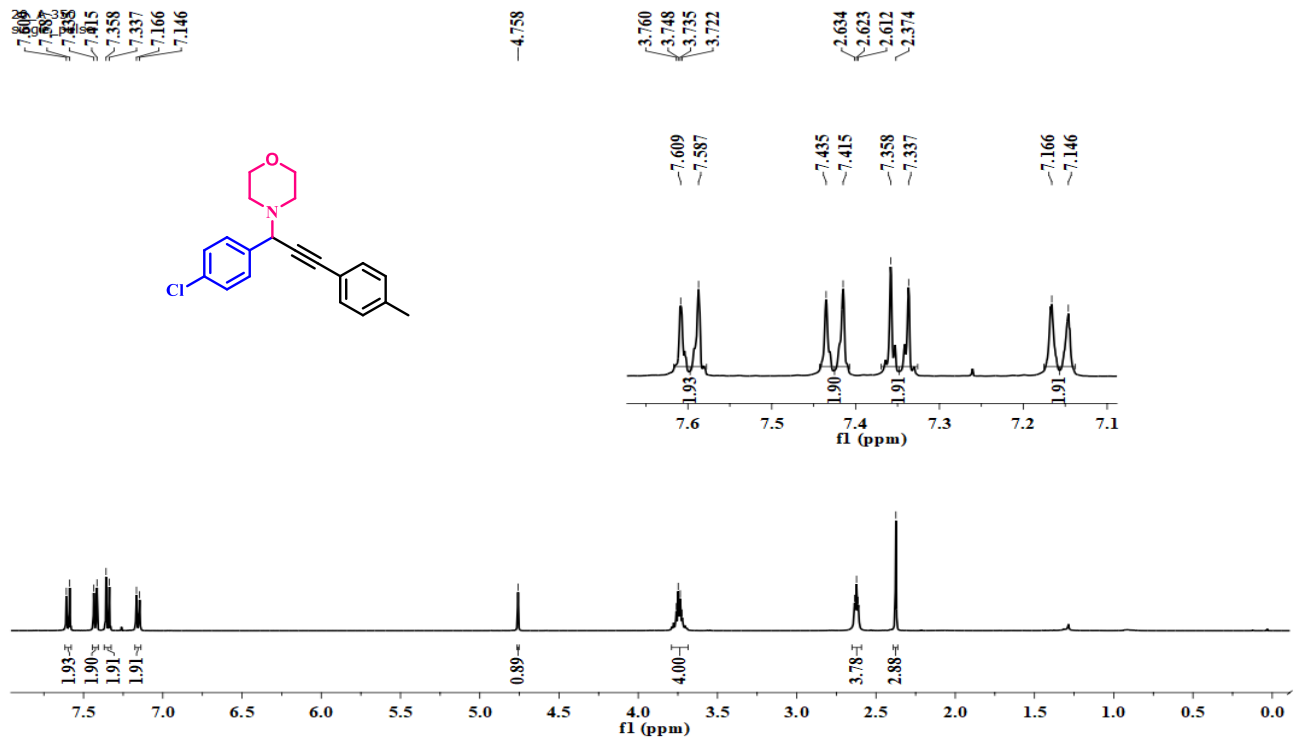

Figure S160: <sup>1</sup>H NMR spectrum of 10ak taking CDCl<sub>3</sub> as solvent.

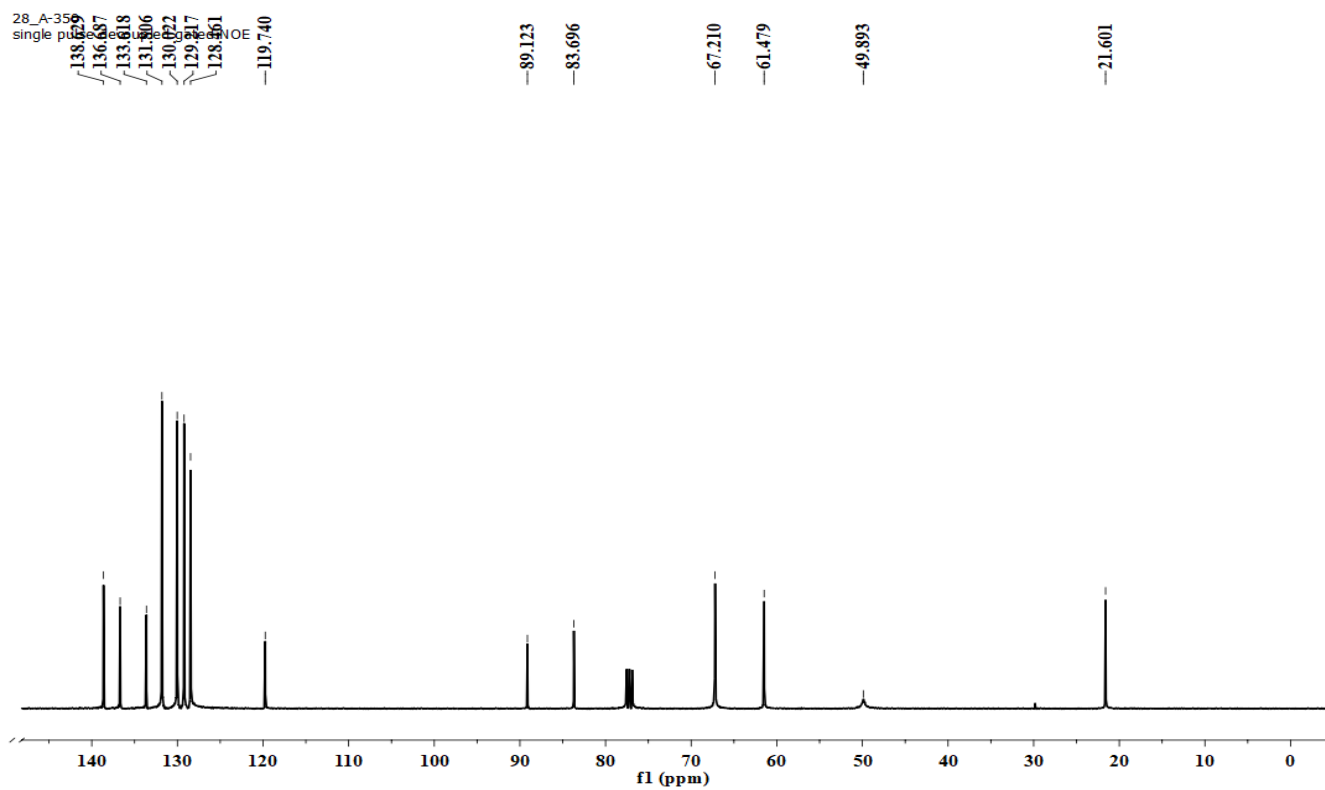

Figure S161: <sup>13</sup>C NMR spectrum of 10ak taking CDCl<sub>3</sub> as solvent.



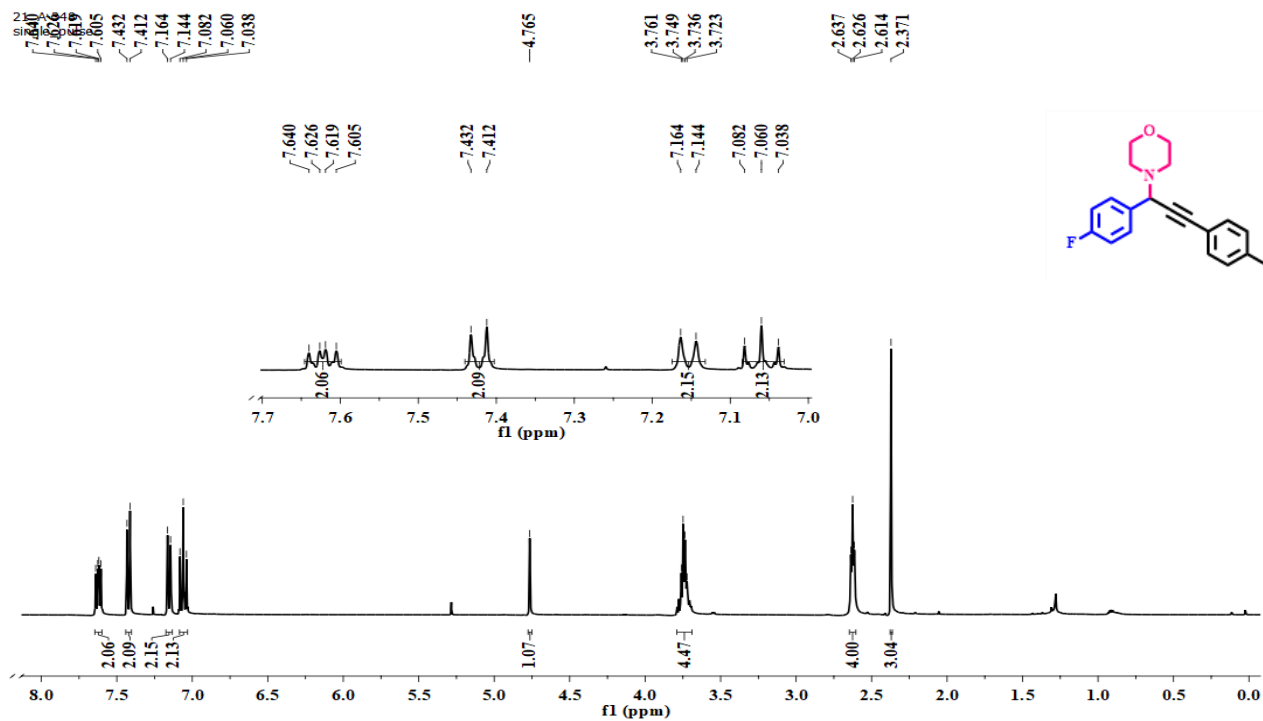

**Figure S162:** <sup>1</sup>H NMR spectrum of 10al taking CDCl<sub>3</sub> as solvent

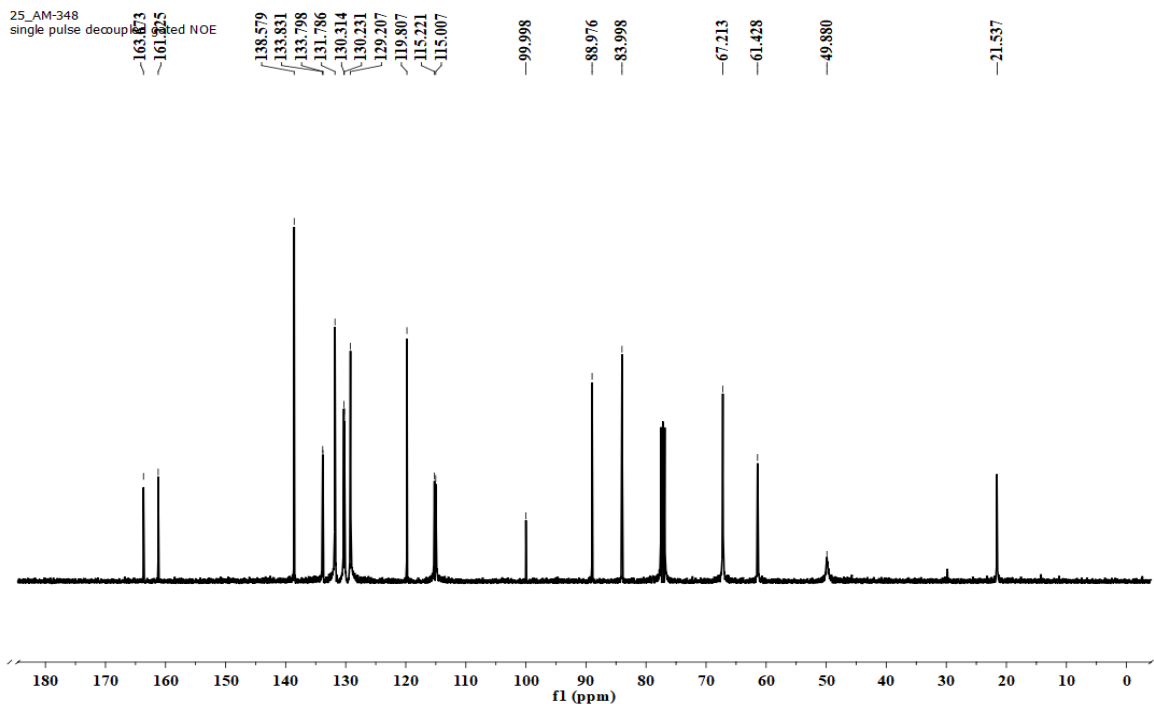

**Figure S163:** <sup>13</sup>C NMR spectrum of 10al taking CDCl<sub>3</sub> as solvent.

1\_A-361  
single\_pulse

8.541  
8.157  
8.026  
8.007  
7.961  
7.541  
7.521  
7.440  
7.420  
7.172  
7.153

4.874

3.764  
3.750  
3.741  
3.727

2.690  
2.681  
2.662  
2.653  
2.616  
2.373

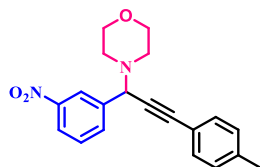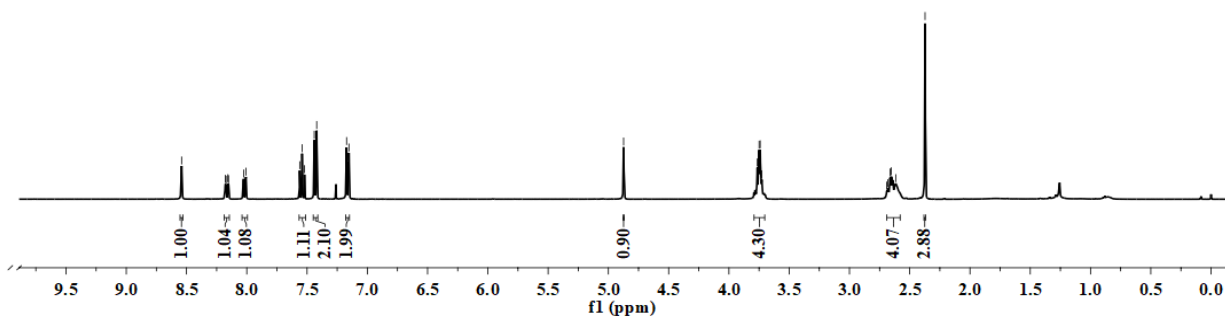

Figure S164: <sup>1</sup>H NMR spectrum of 10am taking CDCl<sub>3</sub> as solvent.

148.458  
140.643  
138.942  
134.638  
131.852  
129.264  
123.603  
122.954  
119.327

90.034

82.493

67.113

61.419

49.936

29.786

21.596

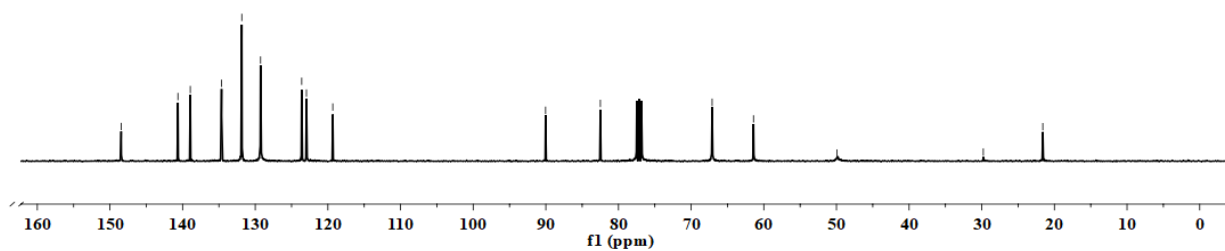

Figure S165: <sup>13</sup>C NMR spectrum of 10am taking CDCl<sub>3</sub> as solvent.

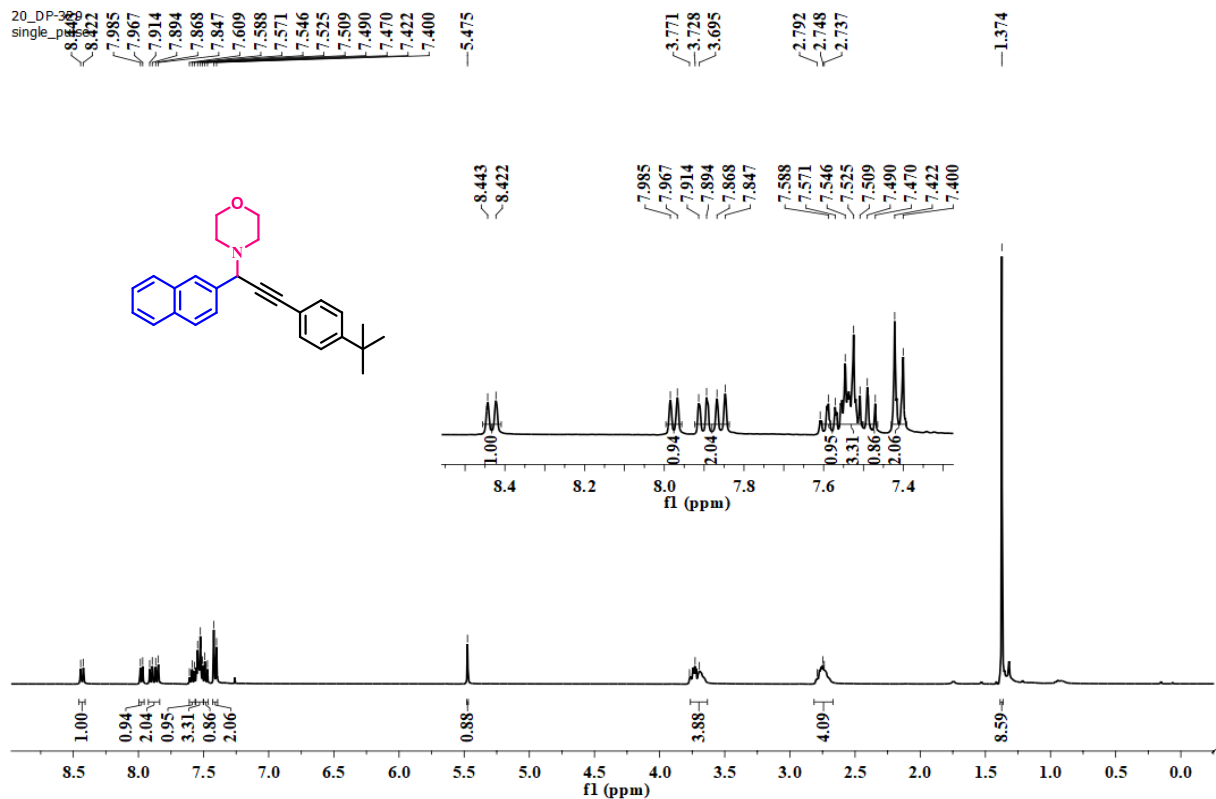

Figure S166: <sup>1</sup>H NMR spectrum of 10a taking CDCl<sub>3</sub> as solvent.

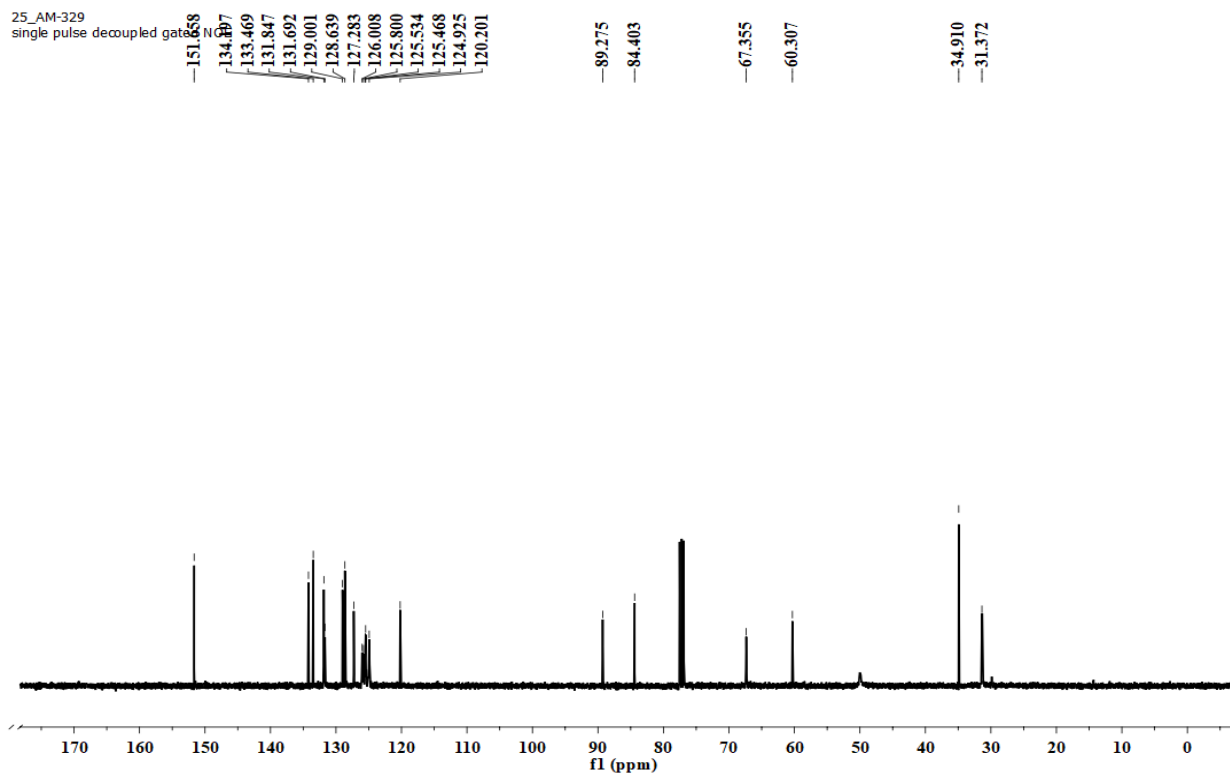

Figure S167: <sup>13</sup>C NMR spectrum of 10a taking CDCl<sub>3</sub> as solvent.

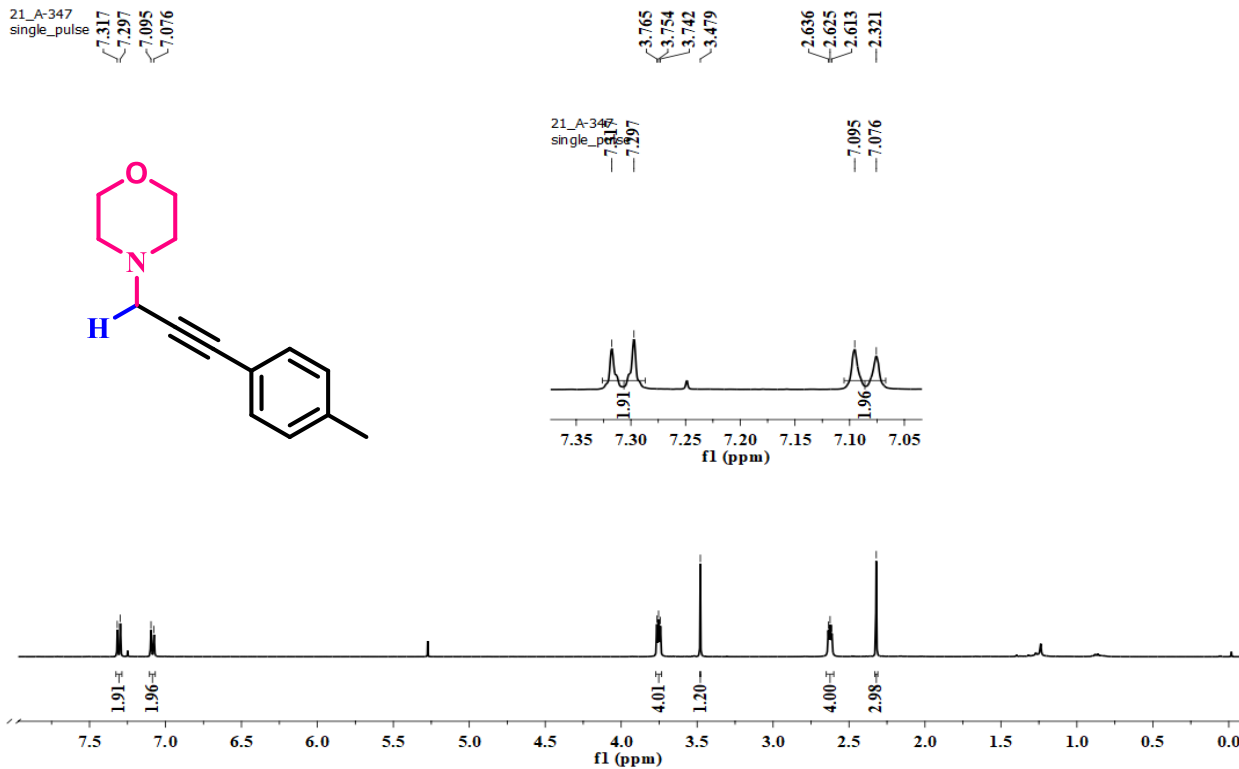

Figure S168:  $^1\text{H}$  NMR spectrum of 10ao taking  $\text{CDCl}_3$  as solvent.

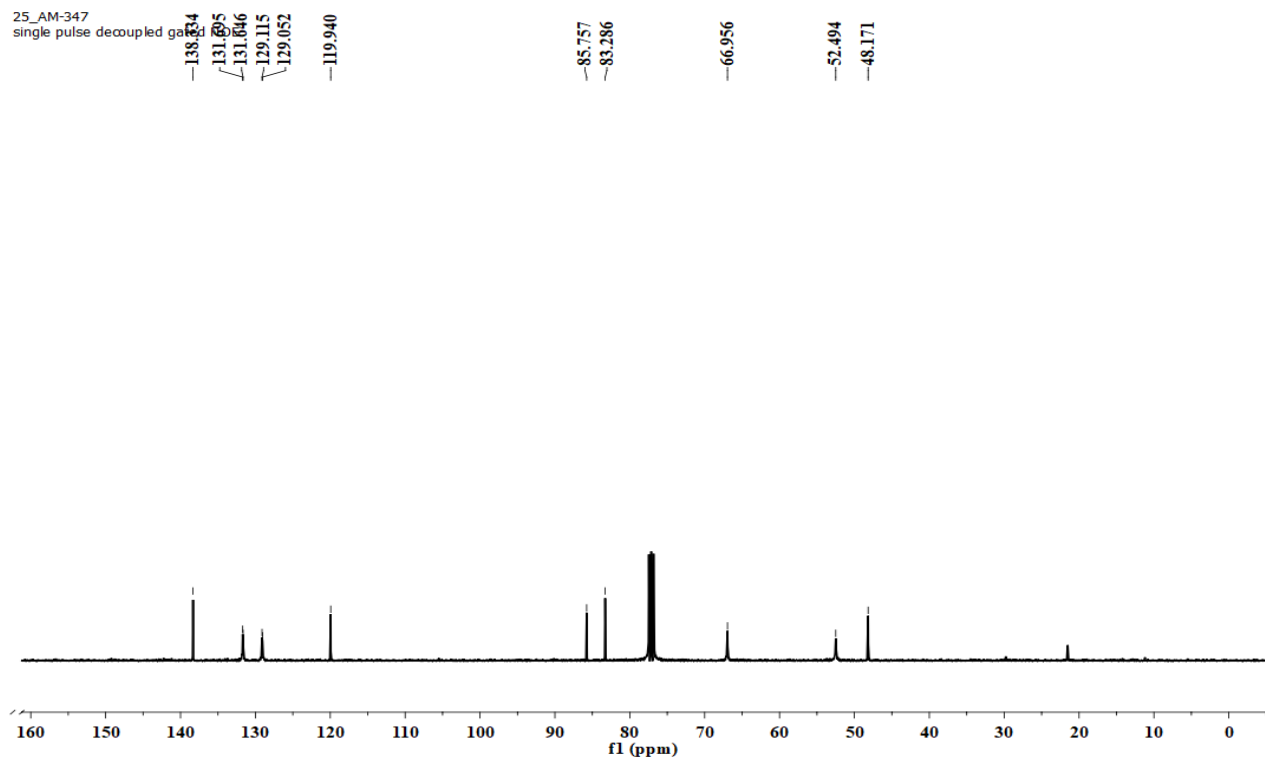

Figure S169:  $^{13}\text{C}$  NMR spectrum of 10ao taking  $\text{CDCl}_3$  as solvent.
